# Supplementary material for: Catalytic asymmetric construction of dispirotriheterocyclic structures through [3+2] cycloadditions of 4-amino pyrazolone-based azomethine ylides
Source: Royal Society of Chemistry journal article supplement (doi:10.1039/d2nj02895f), 2022-01-01
Supplement: d2nj02895f1.pdf [file d2nj02895f1.pdf]

**Catalytic asymmetric construction of dispirotriheterocyclic structures through  
[3+2] cycloadditions of 4-amino pyrazolone-based azomethine ylides**  
Yue Huang, Xiaoze Bao, Xingfu Wei, Jianfang Zhang, Shah Nawaz, Jingping Qu and  
Baomin Wang\*

State Key Laboratory of Fine Chemicals, Department of Pharmaceutical Sciences,  
School of Chemical Engineering, Dalian University of Technology, Dalian 116024, P.  
R. China  
bmwang@dlut.edu.cn

**Contents:**

|                                         |    |
|-----------------------------------------|----|
| 1. General information .....            | 1  |
| 2. Experimental sections .....          | 1  |
| 3. X-ray crystal structure of 4ad ..... | 67 |

## 1. General information

Unless otherwise noted, materials were purchased from commercial suppliers and used without further purification. Column chromatography was performed on silica gel (200~300 mesh). Enantiomeric excesses (*ee*) were determined by HPLC using corresponding commercial chiral columns as stated at 30 °C with UV detector at 254 nm. Optical rotations were reported as follows:  $[\alpha]_D^T$  (c g/100 mL, solvent). All  $^1\text{H}$  NMR and  $^{19}\text{F}$  NMR spectra were recorded on a Bruker Avance II 400 MHz and Bruker Avance III 471 MHz respectively,  $^{13}\text{C}$  NMR spectra were recorded on a Bruker Avance II 101 MHz or Bruker Avance III 126 MHz with chemical shifts reported as ppm (in  $\text{CDCl}_3$ , TMS as an internal standard). Data for  $^1\text{H}$  NMR are recorded as follows: chemical shift ( $\delta$ , ppm), multiplicity (s = singlet, d = doublet, t = triplet, m = multiplet, br = broad singlet, dd = double doublet, coupling constants in Hz, integration). HRMS (ESI) was obtained with an HRMS/MS instrument (LTQ Orbitrap XL TM). The absolute configuration of **4ad** was assigned by the X-ray analysis.

Starting materials: All the aldehydes were commercially obtained and recrystallized or distilled prior to use. (1) 4-Amino pyrazolones were prepared following the reported procedures: 5 X. Bao, S. Wei, X. Qian, J. Qu, B. Wang, L. Zou and G. Ge, *Org. Lett.*, 2018, **20**, 3394. (2) Methyleneindolinones were synthesized according to following literature procedures: (a) K. Suman, L. Srinu and S. Thennarasu, *Org. Lett.*, 2014, **16**, 3732; (b) A. Huang, J. J. Kodanko and L. E. Overman, *J. Am. Chem. Soc.*, **2004**, *126*, 14043.

## 2. Experimental sections

### General procedure for the synthesis of **4**

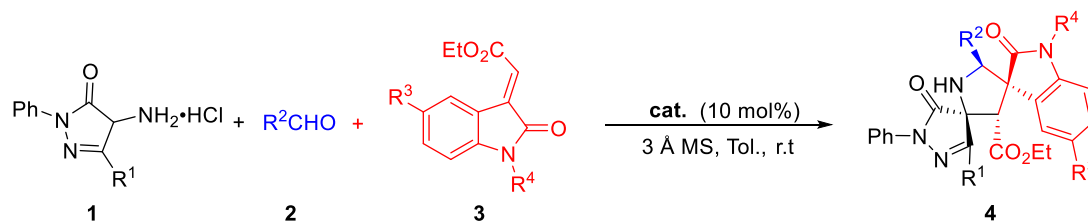

In a reaction tube, 4-amino pyrazolone **1** (0.24 mmol), methyleneindolinone **3** (0.2 mmol), catalyst (0.02 mmol) and 3 Å MS (200 mg) were added into toluene (2 mL). Then aldehyde **2** (0.24 mmol) was added and the reaction solution was stirred at 25 °C. After the reaction was complete (monitored by TLC), the crude product was purified by column chromatography (ethyl acetate/petroleum ether = 1/20 to 1/4) on silica gel to give the product **4**.

**Table 1:** Optimization of reaction conditions. <sup>a</sup> BPA=chiral phosphoric acid.

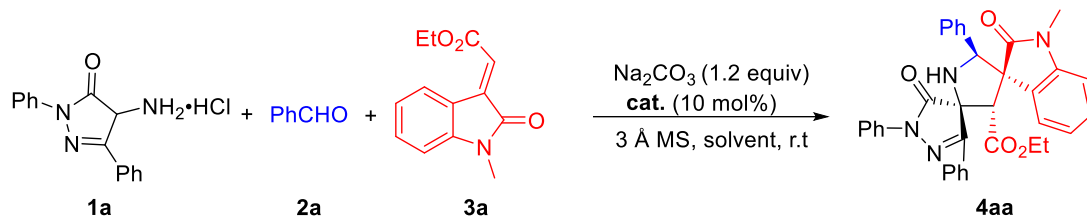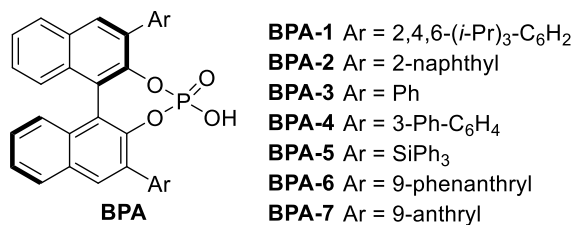

| entry               | Cat.         | Additives         | Solvent           | t[h] | Yield[%] <sup>b</sup> | dr <sup>c</sup> | ee[%] <sup>d</sup> |
|---------------------|--------------|-------------------|-------------------|------|-----------------------|-----------------|--------------------|
| 1                   | <b>BPA-1</b> | 3 Å               | DCM               | 59   | 74                    | >20:1           | 35                 |
| 2                   | <b>BPA-2</b> | 3 Å               | DCM               | 59   | 94                    | >20:1           | 65                 |
| 3                   | <b>BPA-3</b> | 3 Å               | DCM               | 59   | 53                    | >20:1           | 25                 |
| 4                   | <b>BPA-4</b> | 3 Å               | DCM               | 59   | 70                    | >20:1           | 25                 |
| 5                   | <b>BPA-5</b> | 3 Å               | DCM               | 59   | 64                    | >20:1           | 0                  |
| 6                   | <b>BPA-6</b> | 3 Å               | DCM               | 59   | 83                    | >20:1           | 93                 |
| 7                   | <b>BPA-7</b> | 3 Å               | DCM               | 59   | 65                    | >20:1           | 90                 |
| 8                   | <b>BPA-6</b> | 3 Å               | CHCl <sub>3</sub> | 43   | 78                    | >20:1           | 78                 |
| 9                   | <b>BPA-6</b> | 3 Å               | THF               | 13   | 73                    | >20:1           | 40                 |
| 10                  | <b>BPA-6</b> | 3 Å               | Et <sub>2</sub> O | 13   | 85                    | >20:1           | 76                 |
| 11                  | <b>BPA-6</b> | 3 Å               | Tol               | 24   | 85                    | >20:1           | 96                 |
| 12 <sup>e</sup>     | <b>BPA-6</b> | 3 Å               | Tol               | 67   | 96                    | >20:1           | 95                 |
| 13 <sup>e</sup>     | <b>BPA-6</b> | 4 Å               | Tol               | 60   | 88                    | >20:1           | 95                 |
| 14 <sup>e</sup>     | <b>BPA-6</b> | 5 Å               | Tol               | 36   | 85                    | >20:1           | 96                 |
| 15 <sup>e</sup>     | <b>BPA-6</b> | MgSO <sub>4</sub> | Tol               | 36   | 82                    | >20:1           | 95                 |
| 16 <sup>e</sup>     | <b>BPA-6</b> | -                 | Tol               | 84   | 72                    | >20:1           | 95                 |
| 17 <sup>e,f</sup>   | <b>BPA-6</b> | 3 Å               | Tol               | 60   | 86                    | >20:1           | 95                 |
| 18 <sup>e,f,g</sup> | <b>BPA-6</b> | 3 Å               | Tol               | 60   | 97                    | >20:1           | 95                 |

<sup>a</sup>The reaction was conducted with **1a** (0.1 mmol), **2a** (0.12 mmol), **3a** (0.12 mmol) and **cat.** (0.01 mmol), MS (100 mg) in solvent (1.0 mL) at room temperature under argon. <sup>b</sup>Isolated yield. <sup>c</sup>Detected by <sup>1</sup>HNMR of the crude product.

<sup>d</sup>Detected by chiral HPLC analysis. <sup>e</sup>Without Na<sub>2</sub>CO<sub>3</sub> <sup>f</sup>No protection. <sup>g</sup>A the ratio of **1a/2a/3a** was 1.2/1.2/1.

## Gram-scale reaction

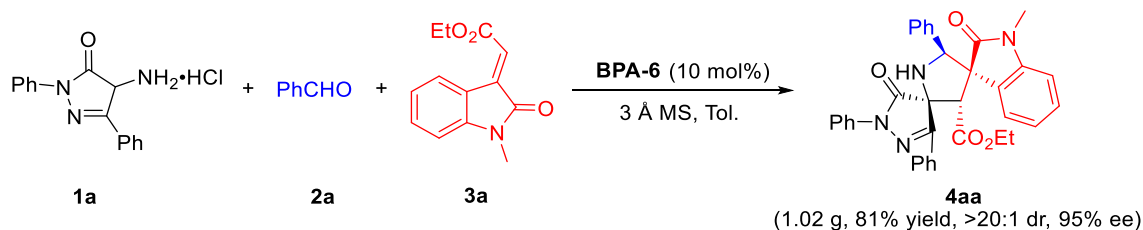

In a reaction tube, 4-amino pyrazolone **1a** (0.264 mmol), **3a** (0.22 mmol), **BPA-6** (0.022 mmol) and 3 Å MS (220 mg) were added into toluene (2.2 mL). Then aldehyde **2a** (0.264 mmol) was added and the reaction solution was stirred at 25 °C. After the reaction was complete (monitored by TLC), the crude product was purified by column chromatography (ethyl acetate/petroleum ether = 1/20 to 1/4) on silica gel to give the product **4aa** with 81% yield, >20:1 dr and 95% ee.

### Procedure for the Synthesis of **5**

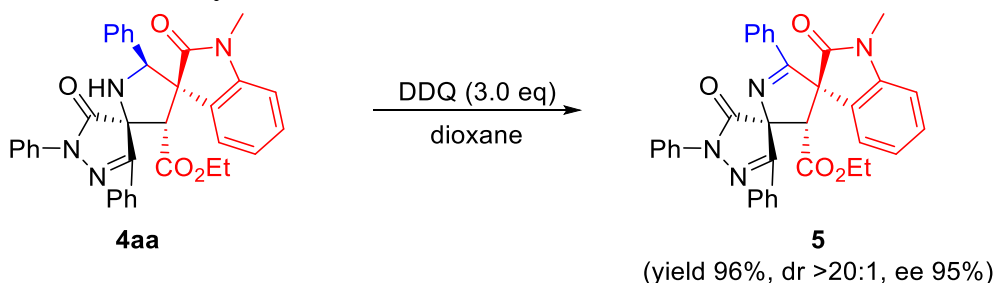

A reaction tube was charged with **4aa** (0.2 mmol) and dioxane (2 mL), then DDQ (0.6 mmol) was added. The reaction was stirred at room temperature until it was complete (monitored by TLC), then the crude product was purified by column chromatography (ethyl acetate/petroleum ether = 1/10) on silica gel to give the product **5** as a white solid.

## Copies of $^1\text{H}$ NMR and $^{13}\text{C}$ NMR spectra

### 4aa

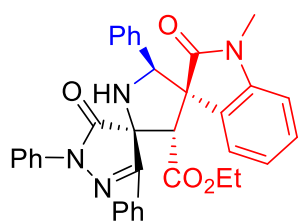

**4aa**

Prepared according to the procedure within 72 h as White solid (110.6 mg, 97% yield, dr > 20:1). mp 176.2 – 177.5 °C;  $[\alpha]_D^{19} = -385.22$  ( $c$  0.46,  $\text{CH}_2\text{Cl}_2$ );  $^1\text{H}$  NMR (400 MHz,  $\text{CDCl}_3$ )  $\delta$  8.69 (d,  $J = 7.7$  Hz, 2H), 8.05 – 8.11 (m, 3H), 7.58 – 7.65 (m, 2H), 7.56 – 7.42 (m, 3H), 7.31 (dd,  $J = 7.6$  Hz, 1H), 7.25 – 7.14 (m, 5H), 7.13 – 7.00 (m, 2H), 6.69 (d,  $J = 7.5$  Hz, 1H), 5.95 (s, 1H), 4.72 (s, 1H), 3.79 – 3.38 (m, 2H), 2.79 (s, 3H), 2.68 (s, 1H), 0.49 (t,  $J = 6.9$  Hz, 3H);  $^{13}\text{C}$  NMR (101 MHz,  $\text{CDCl}_3$ )  $\delta$  177.43, 175.08, 167.67, 155.14, 143.88, 138.18, 136.45, 130.73, 129.70, 129.59, 129.00, 128.90, 128.65, 128.16, 127.92, 127.64, 126.71, 125.67, 125.32, 123.43, 119.28, 107.42, 70.87, 69.21, 60.85, 60.41, 58.44, 26.02, 13.17; HRMS (ESI)  $m/z$  Calcd. for  $\text{C}_{35}\text{H}_{31}\text{N}_4\text{O}_4^+$  ( $[\text{M}+\text{H}]^+$ ) 571.2340, Found 571.2323; Enantiomeric excess was determined to be 95% (determined by HPLC using chiral AD-H column, hexane/2-propanol = 70/30,  $\lambda = 254$  nm, 30 °C, 0.8 mL/min,  $t_{\text{major}} = 9.9$  min,  $t_{\text{minor}} = 18.0$  min).

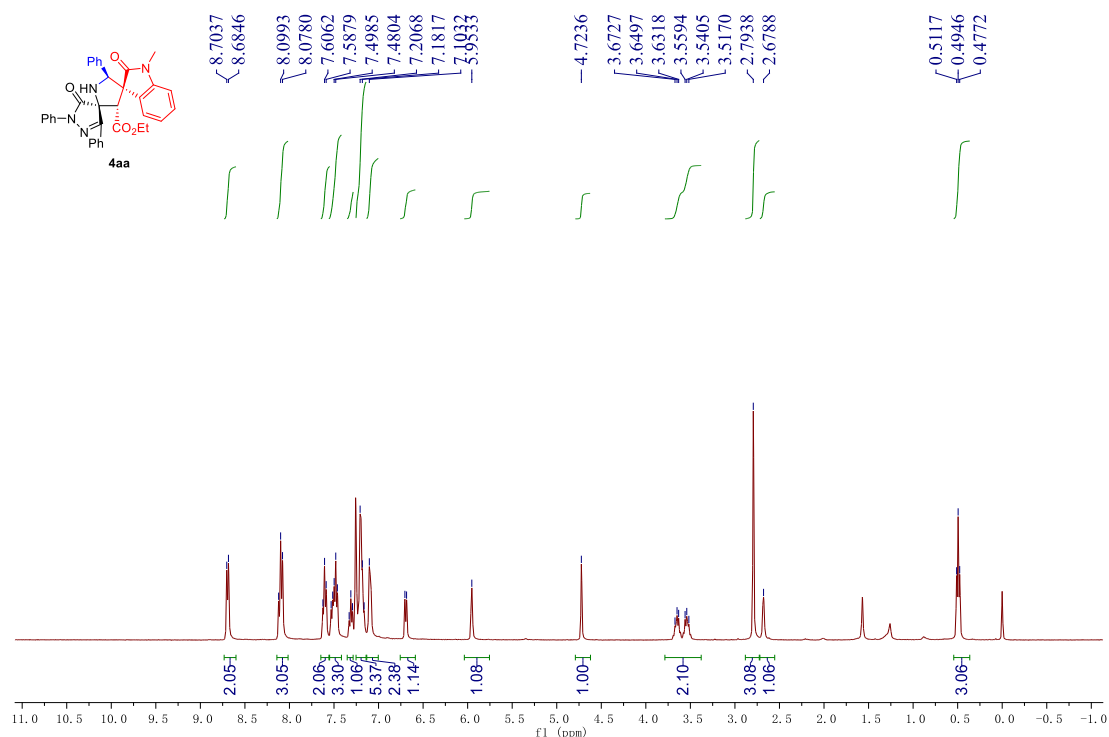

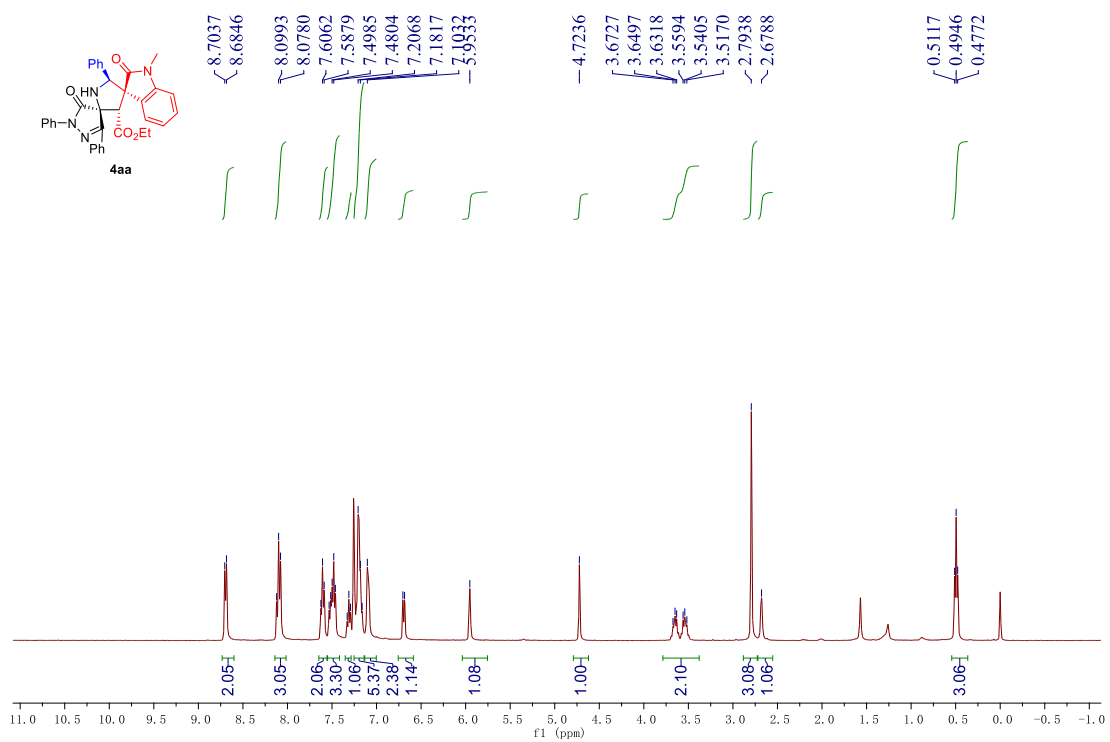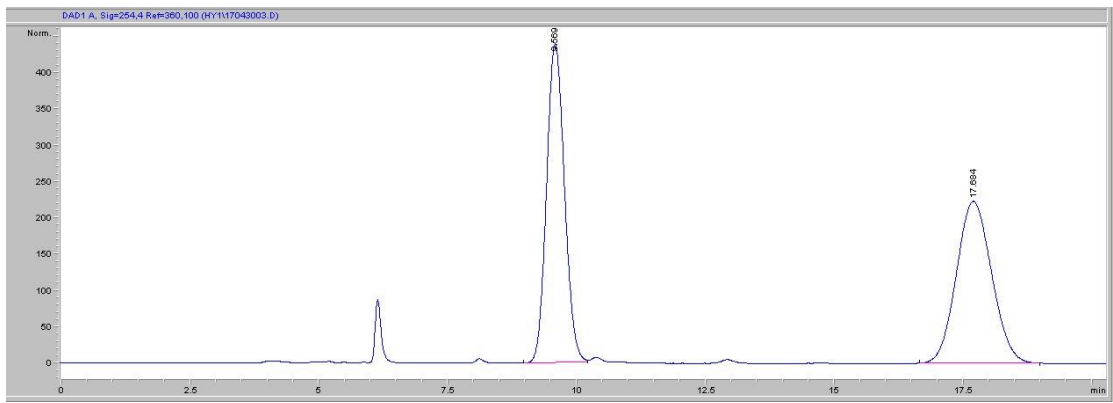

| # | Time   | Area    | Height | Width  | Area%  | Symmetry |
|---|--------|---------|--------|--------|--------|----------|
| 1 | 9.569  | 10640.8 | 439    | 0.3788 | 50.075 | 0.869    |
| 2 | 17.684 | 10608.7 | 222.9  | 0.7352 | 49.925 | 0.888    |

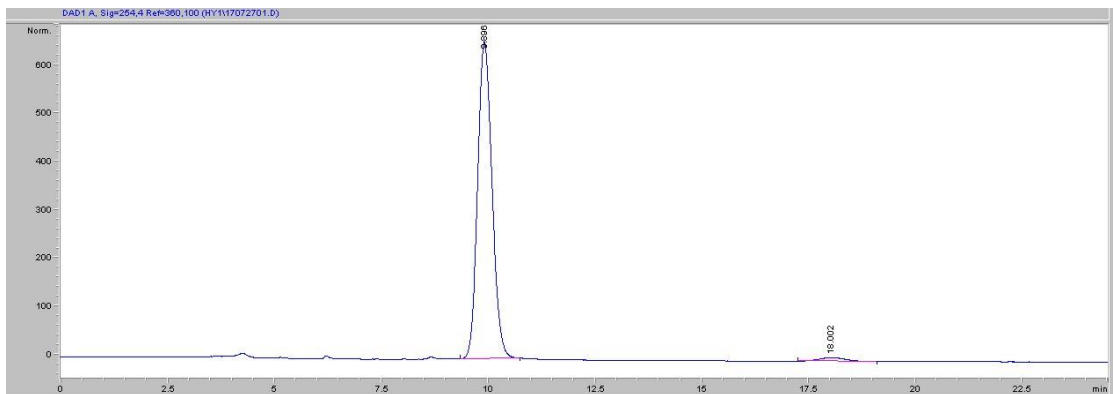

| # | Time   | Area    | Height | Width  | Area%  | Symmetry |
|---|--------|---------|--------|--------|--------|----------|
| 1 | 9.896  | 15444.4 | 658.2  | 0.3658 | 97.894 | 0.829    |
| 2 | 18.002 | 332.2   | 7.7    | 0.5161 | 2.106  | 0.805    |

#### 4ab

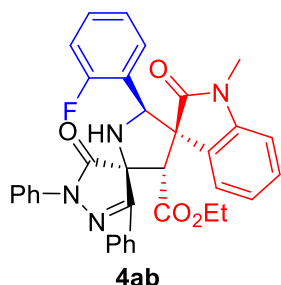

Prepared according to the procedure within 72 h as White solid (93.0 mg, 79% yield, dr > 20:1). mp 110.0 – 110.5 °C;  $[\alpha]_D^{18} = -341.31$  ( $c$  0.49,  $\text{CH}_2\text{Cl}_2$ );  $^1\text{H NMR}$  (400 MHz,  $\text{CDCl}_3$ )  $\delta$  8.66 (d,  $J = 7.6$  Hz, 2H), 8.16 – 8.15 (m, 3H), 7.82 – 7.91 (m, 1H), 7.70 – 7.50 (m, 2H), 7.54 – 7.43 (m, 3H), 7.29 – 7.09 (m, 5H), 6.74 – 6.82 (m, 1H), 6.69 (d,  $J = 7.6$  Hz, 1H), 6.28 (d,  $J = 3.8$  Hz, 1H), 4.73 (s, 1H), 3.46 – 3.66 (m, 2H), 2.87 (s, 3H), 2.60 (d,  $J = 3.8$  Hz, 1H), 0.48 (t,  $J = 7.1$  Hz, 3H);  $^{19}\text{F NMR}$  (470 MHz,  $\text{CDCl}_3$ )  $\delta$  -116.57;  $^{13}\text{C NMR}$  (101 MHz,  $\text{CDCl}_3$ )  $\delta$  177.42, 174.97, 167.51, 154.87, 143.74, 138.12, 130.73, 129.73 ( $J = 3.6$  Hz), 129.53, 129.42 ( $J = 3.8$  Hz), 129.41, 128.99, 128.92, 128.49, 127.54, 125.86, 125.34, 123.87, 123.84, 123.71, 123.42, 119.27, 114.57 ( $J = 21.5$  Hz), 107.26, 70.77, 62.03, 60.89, 59.87, 58.88, 26.18, 13.12; HRMS (ESI)  $m/z$  Calcd. for  $\text{C}_{35}\text{H}_{30}\text{FN}_4\text{O}_4^+$  ( $[\text{M}+\text{H}]^+$ ) 589.2246, Found 589.2234; Enantiomeric excess was determined to be 90% (determined by HPLC using chiral AD-H column, hexane/2-propanol = 70/30,  $\lambda = 254$  nm, 30 °C, 0.8 mL/min,  $t_{\text{major}} = 9.2$  min,  $t_{\text{minor}} = 14.0$  min).

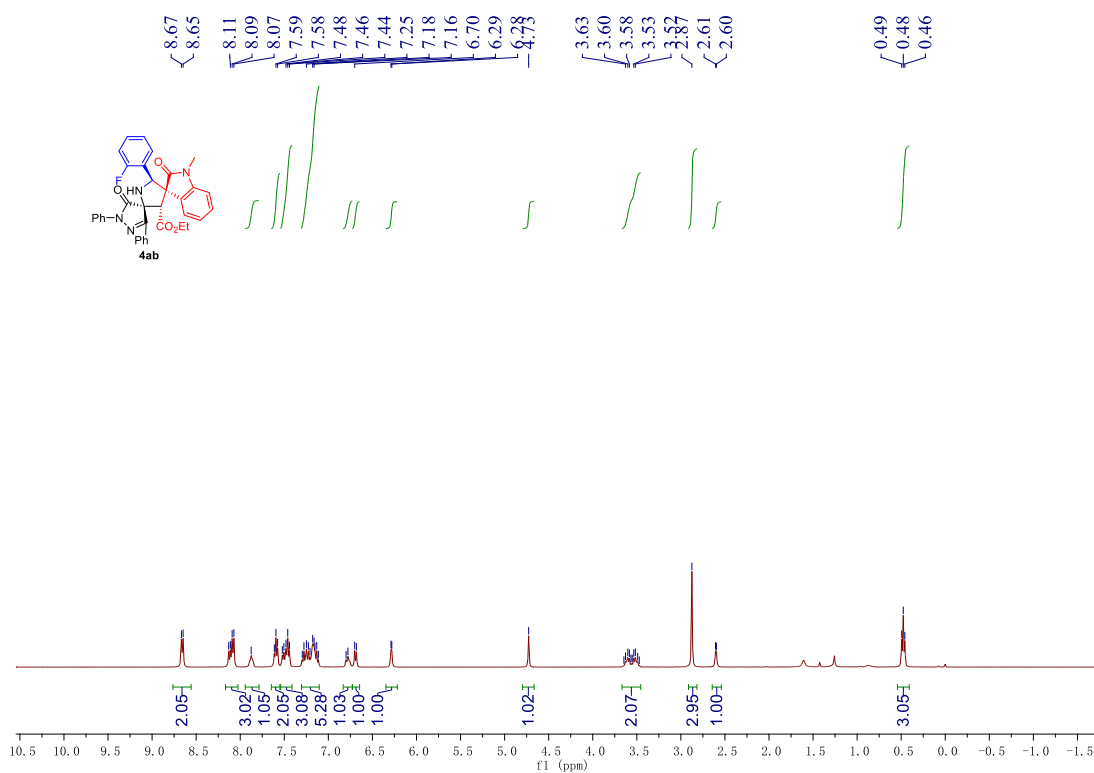

177.42  
 174.97  
 167.51  
 154.87  
 143.74  
 138.12  
 130.73  
 129.75  
 129.71  
 129.53  
 129.44  
 129.41  
 129.36  
 128.99  
 128.92  
 128.49  
 127.54  
 125.86  
 125.34  
 123.87  
 123.84  
 123.71  
 123.42  
 119.27  
 114.68  
 114.46  
 107.26  
 70.77  
 62.03  
 60.89  
 59.87  
 58.88  
 26.18  
 13.12

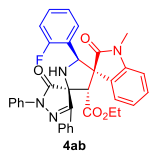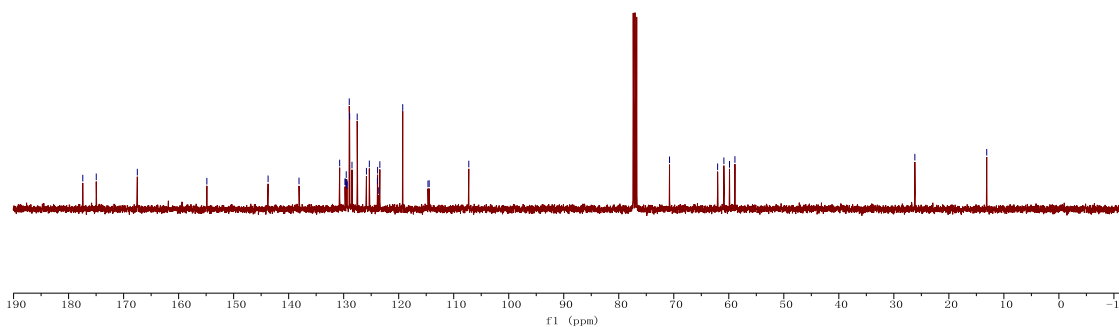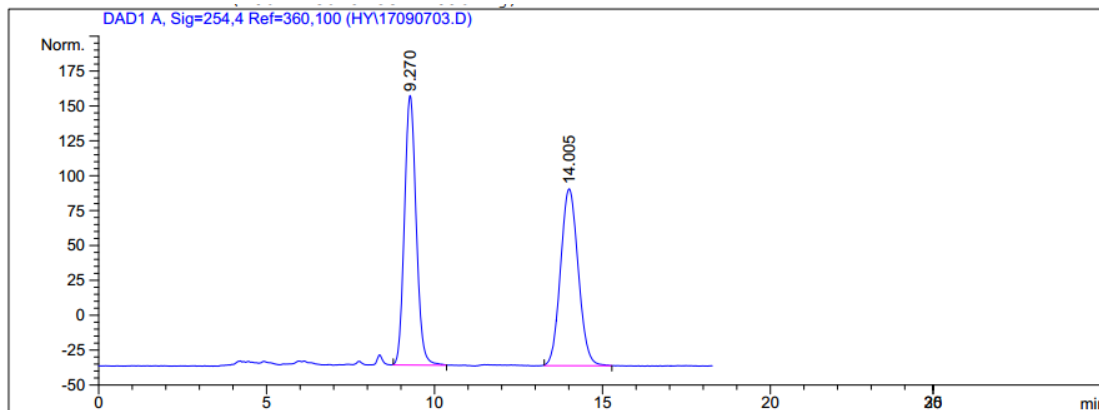

| Peak # | RetTime [min] | Type | Width [min] | Area [mAU*s] | Height [mAU] | Area %  |
|--------|---------------|------|-------------|--------------|--------------|---------|
| 1      | 9.270         | BB   | 0.3749      | 4685.85059   | 193.23424    | 50.2373 |
| 2      | 14.005        | BB   | 0.5753      | 4641.58154   | 126.73827    | 49.7627 |

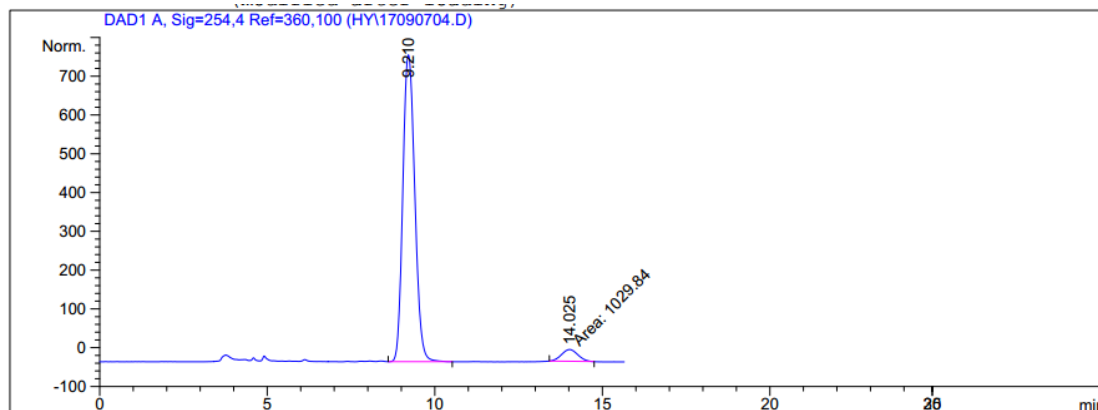



| Peak # | RetTime [min] | Type | Width [min] | Area [mAU*s] | Height [mAU] | Area %  |
|--------|---------------|------|-------------|--------------|--------------|---------|
| 1      | 9.210         | VP   | 0.3891      | 1.96098e4    | 791.26025    | 95.0104 |
| 2      | 14.025        | MM   | 0.5644      | 1029.83936   | 30.41260     | 4.9896  |

#### 4ac

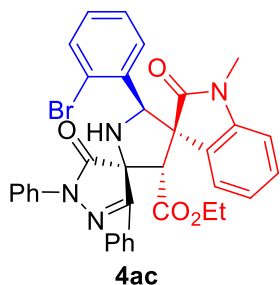

Prepared according to the procedure within 72 h as White solid (125.7 mg, 97% yield, dr > 20:1). mp 133.3 – 134.0 °C;  $[\alpha]_D^{17} = -285.85$  (*c* 0.83, CH<sub>2</sub>Cl<sub>2</sub>); <sup>1</sup>H NMR (400 MHz, CDCl<sub>3</sub>) δ 8.65 (d, *J* = 7.5 Hz, 2H), 8.21 – 8.00 (m, 4H), 7.56 – 7.65 (m, 2H), 7.55 – 7.42 (m, 3H), 7.40 – 7.20 (m, 4H), 7.15 – 7.03 (m, 2H), 6.67 (d, *J* = 7.7 Hz, 1H), 6.44 (d, *J* = 1.8 Hz, 1H), 4.77 (s, 1H), 3.73 – 3.42 (m, 2H), 2.87 (s, 3H), 2.52 (d, *J* = 2.2 Hz, 1H), 0.47 (t, *J* = 7.1 Hz, 3H); <sup>13</sup>C NMR (101 MHz, CDCl<sub>3</sub>) δ 177.21,

174.95, 167.54, 154.74, 144.00, 138.13, 135.86, 132.50, 131.58, 130.72, 129.57, 129.54, 129.15, 128.99, 128.93, 128.68, 127.53, 127.00, 126.92, 125.35, 123.58, 123.38, 119.31, 107.49, 70.62, 66.31, 60.88, 60.06, 58.76, 26.26, 13.14; HRMS (ESI) *m/z* Calcd. for C<sub>35</sub>H<sub>30</sub>BrN<sub>4</sub>O<sub>4</sub><sup>+</sup> ([*M*+*H*)<sup>+</sup>) 649.1445, Found 649.1436; Enantiomeric excess was determined to be 97% (determined by HPLC using chiral AD-H column, hexane/2-propanol = 70/30, λ = 254 nm, 30 °C, 0.8 mL/min, *t*<sub>major</sub> = 6.0 min, *t*<sub>minor</sub> = 7.3 min).

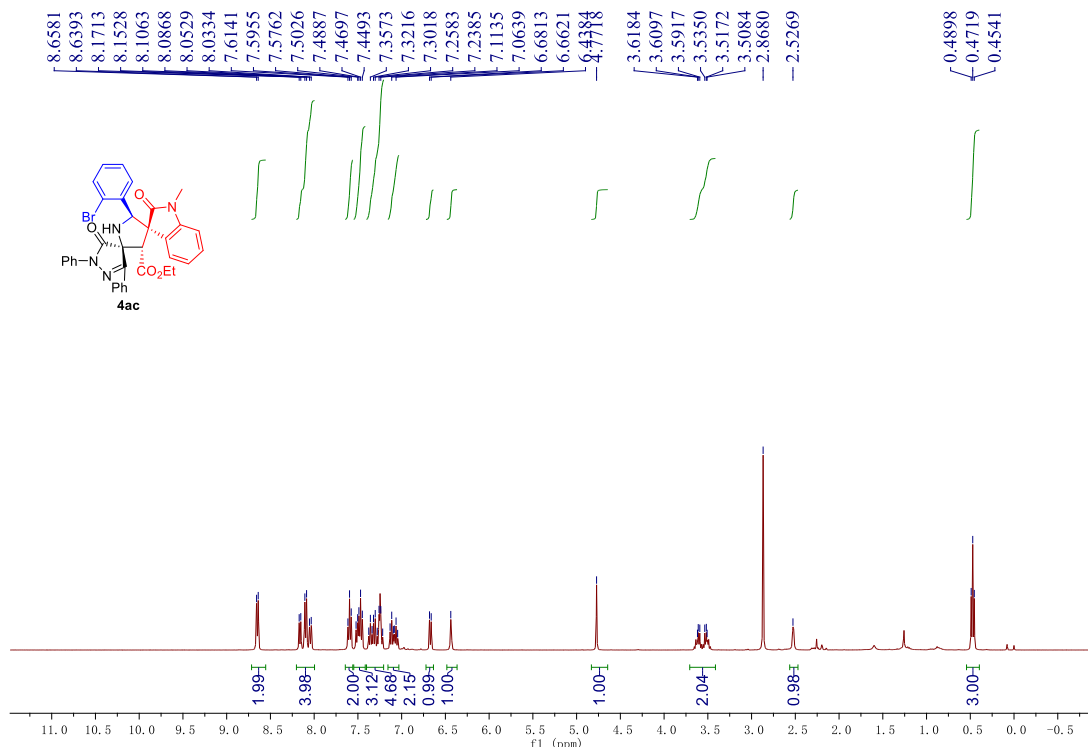

177.21  
 174.95  
 167.54  
 154.74  
 132.50  
 131.58  
 128.99  
 128.93  
 128.68  
 127.53  
 126.92  
 125.35  
 119.36  
 107.36  
 70.62  
 66.31  
 60.88  
 60.06  
 58.76  
 26.26  
 13.14

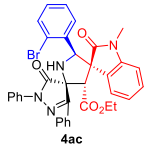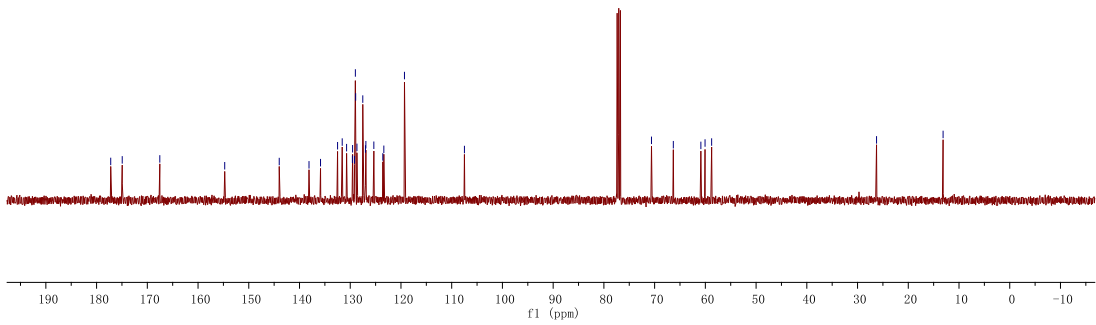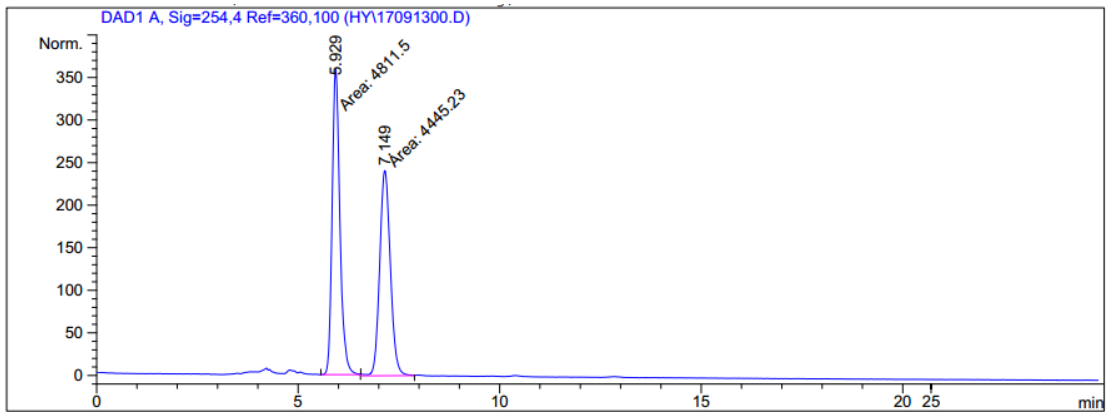

| Peak # | RetTime [min] | Type | Width [min] | Area [mAU*s] | Height [mAU] | Area %  |
|--------|---------------|------|-------------|--------------|--------------|---------|
| 1      | 5.929         | MM   | 0.2236      | 4811.49805   | 358.63751    | 51.9784 |
| 2      | 7.149         | MM   | 0.3071      | 4445.23096   | 241.24675    | 48.0216 |

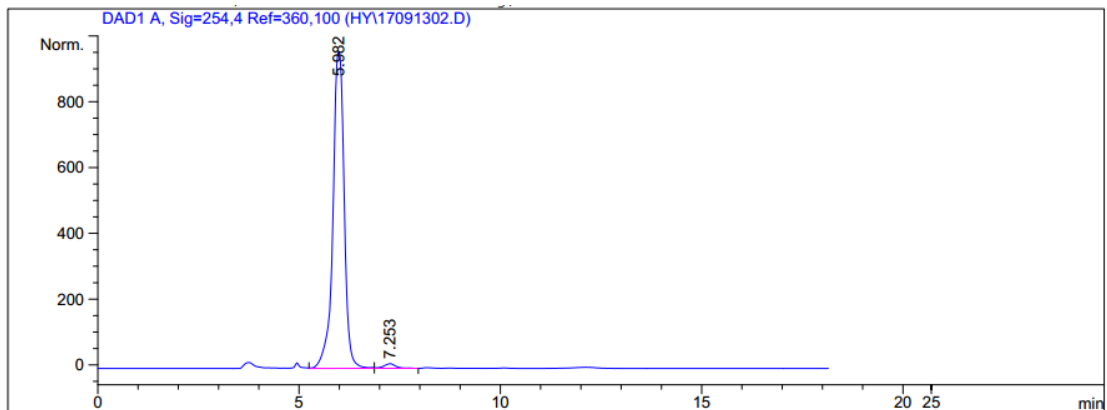

| Peak # | RetTime [min] | Type | Width [min] | Area [mAU*s] | Height [mAU] | Area %  |
|--------|---------------|------|-------------|--------------|--------------|---------|
| 1      | 5.982         | VV   | 0.3031      | 1.87300e4    | 962.18994    | 98.4062 |
| 2      | 7.253         | VB   | 0.3152      | 303.34732    | 14.31570     | 1.5938  |

#### 4ad

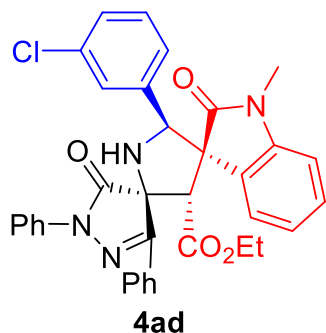

Prepared according to the procedure within 84 h as White solid (108.7 mg, 90% yield, dr > 20:1). mp 143.8 – 144.5 °C;  $[\alpha]_D^{19} = -402.59$  (*c* 0.42, CH<sub>2</sub>Cl<sub>2</sub>); <sup>1</sup>H NMR (400 MHz, Chloroform-*d*) δ 8.68 – 8.45 (m, 2H), 8.29 – 7.87 (m, 3H), 7.64 – 7.55 (m, 2H), 7.54 – 7.46 (m, 1H), 7.45 – 7.38 (m, 2H), 7.34 – 7.25 (m, 1H), 7.22 – 7.06 (m, 4H), 7.04 – 6.96 (m, 2H), 6.77 – 6.65 (m, 1H), 5.84 (d, *J* = 3.8 Hz, 1H), 4.66 (s, 1H), 3.56 (ddq, *J* = 43.0, 10.7, 7.1 Hz, 2H), 2.82 (s, 3H), 2.69 (d, *J* = 4.0 Hz, 1H), 0.47 (t, *J* = 7.1 Hz, 3H); <sup>13</sup>C NMR (101 MHz, CDCl<sub>3</sub>) δ 177.14, 175.06, 167.51, 154.98, 143.84, 138.91, 138.04, 133.81, 130.79, 129.47, 129.36, 129.25, 129.02, 128.93, 128.29, 127.61, 126.80, 125.61, 125.40, 124.86, 123.60, 119.25, 107.58, 70.83, 68.42, 60.92, 60.17, 58.50, 26.15, 13.16; HRMS (ESI) *m/z* Calcd. for C<sub>35</sub>H<sub>30</sub>ClN<sub>4</sub>O<sub>4</sub> ([M+H]<sup>+</sup>) 605.1950, Found 605.1947; Enantiomeric excess was determined to be 97% (determined by HPLC using chiral AD-H column, hexane/2-propanol = 70/30, λ = 254 nm, 30 °C, 0.8 mL/min, *t*<sub>major</sub> = 11.6 min, *t*<sub>minor</sub> = 20.4 min).

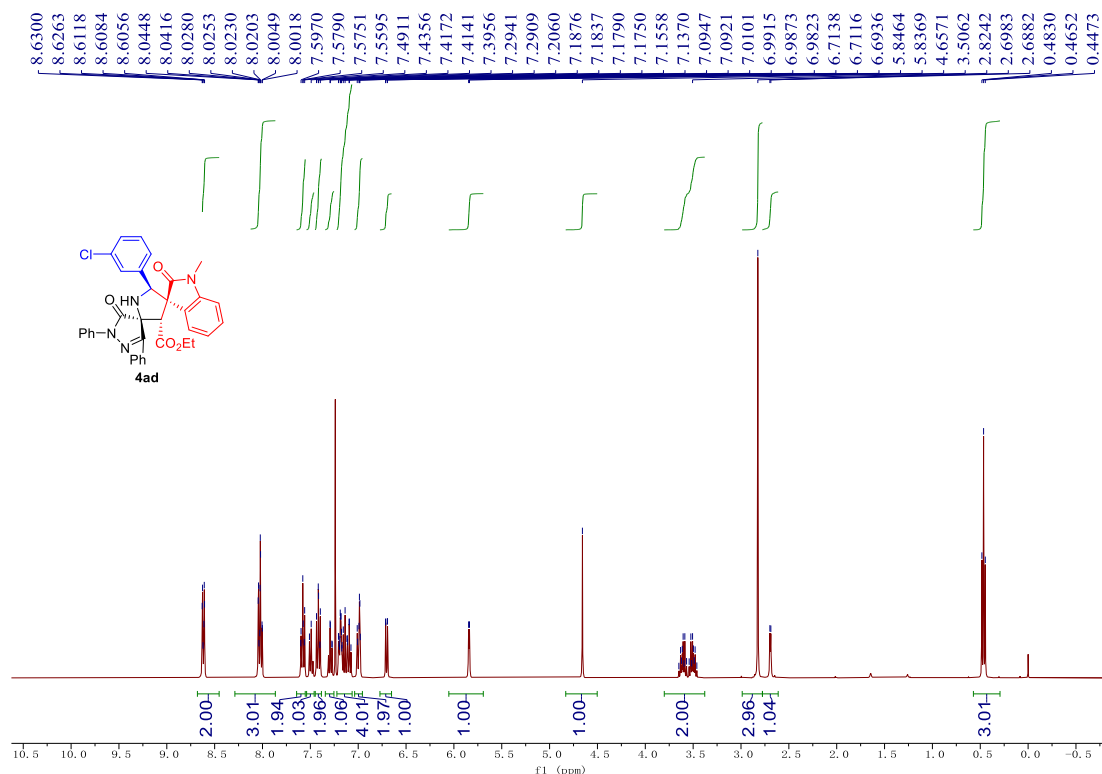

177.1386  
 175.0611  
 167.5088  
 154.9842  
 143.8376  
 138.9081  
 138.0409  
 133.8122  
 130.7870  
 129.4671  
 129.3646  
 129.2497  
 129.0237  
 128.9264  
 128.2877  
 127.6148  
 126.7980  
 125.6093  
 125.3985  
 124.8626  
 123.6037  
 119.2528  
 107.5804  
 70.8301  
 68.4174  
 60.9224  
 60.1714  
 58.4972  
 26.1463  
 13.1557

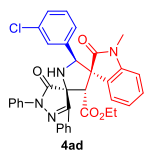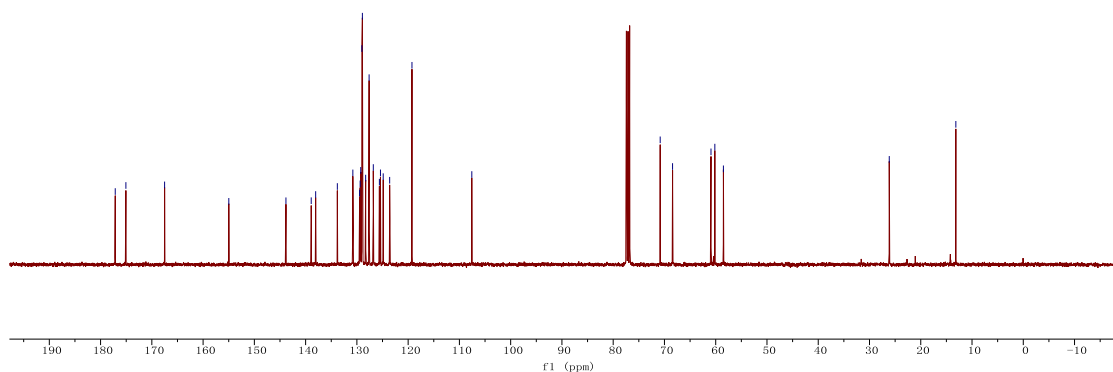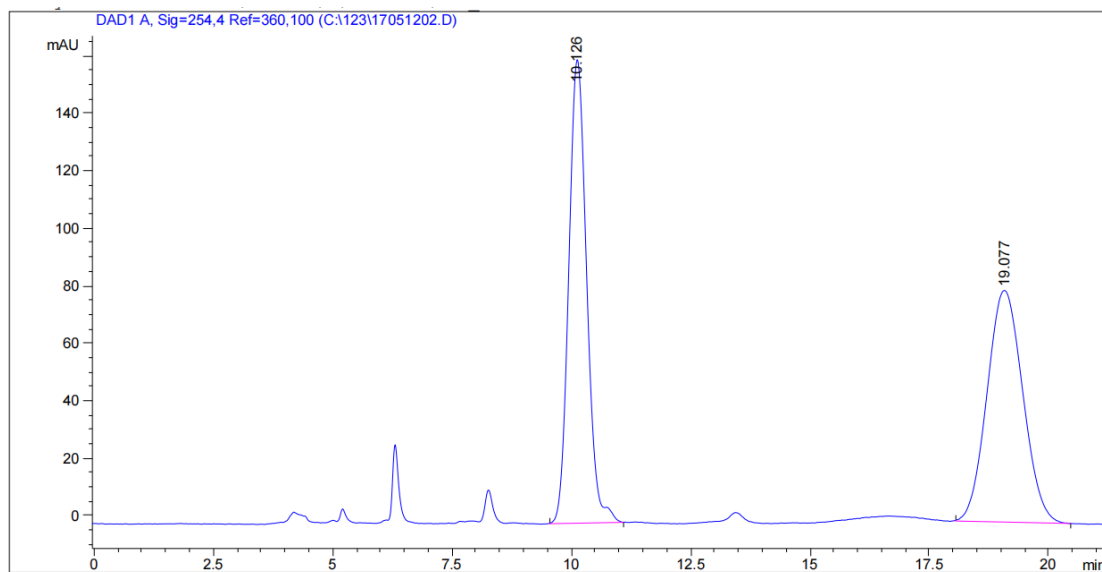

| Peak # | RetTime [min] | Type | Width [min] | Area [mAU*s] | Height [mAU] | Area %  |
|--------|---------------|------|-------------|--------------|--------------|---------|
| 1      | 10.126        | BB   | 0.4078      | 4198.37402   | 161.24039    | 49.9935 |
| 2      | 19.077        | BB   | 0.7902      | 4199.46533   | 80.55557     | 50.0065 |

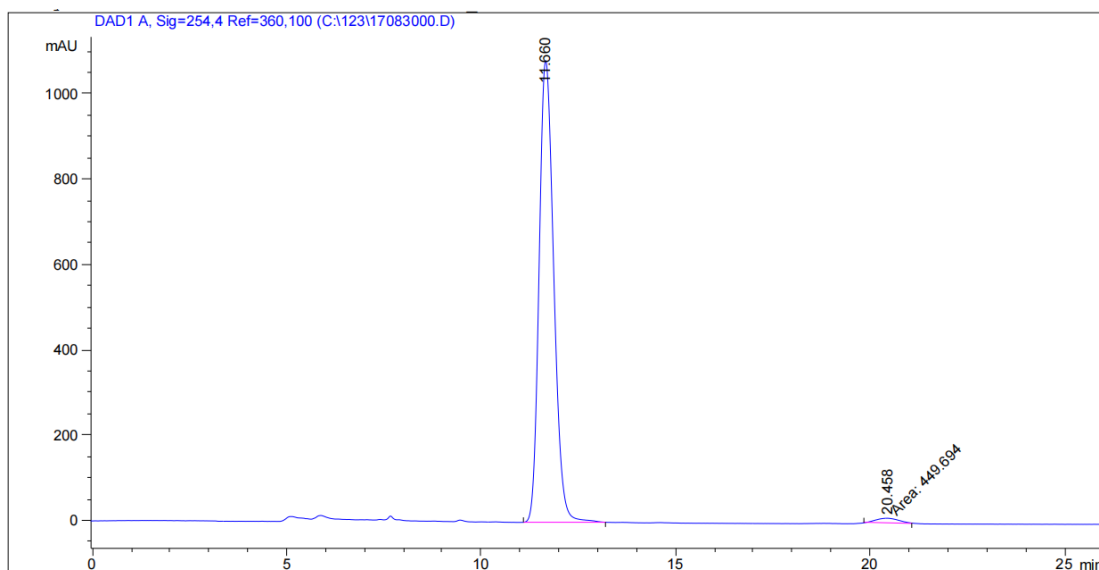

| Peak # | RetTime [min] | Type | Width [min] | Area [mAU*s] | Height [mAU] | Area %  |
|--------|---------------|------|-------------|--------------|--------------|---------|
| 1      | 11.660        | BB   | 0.4052      | 2.83101e4    | 1082.30286   | 98.4364 |
| 2      | 20.458        | MM   | 0.6780      | 449.69357    | 11.05484     | 1.5636  |

#### 4ae

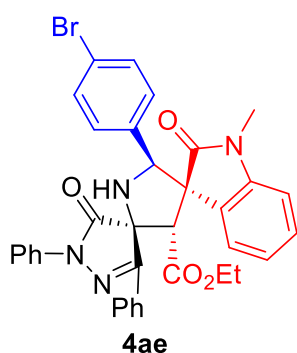

Prepared according to the procedure within 84 h as White solid (116.6 mg, 90% yield, dr > 20:1). mp 135.0 – 135.5 °C;  $[\alpha]_D^{20} = -333.38$  (*c* 0.71, CH<sub>2</sub>Cl<sub>2</sub>); <sup>1</sup>H NMR (400 MHz, CDCl<sub>3</sub>) δ 8.65 (d, *J* = 7.5 Hz, 2H), 8.20 – 8.00 (m, 4H), 7.56 – 7.80 (m, 2H), 7.54 – 7.43 (m, 3H), 7.40 – 7.20 (m, 4H), 7.15 – 7.03 (m, 2H), 6.67 (d, *J* = 7.7 Hz, 1H), 6.44 (d, *J* = 1.8 Hz, 1H), 4.77 (s, 1H), 3.70 – 3.42 (m, 2H), 2.87 (s, 3H), 2.52 (d, *J* = 2.2 Hz, 1H), 0.47 (t, *J* = 7.1 Hz, 3H); <sup>13</sup>C NMR (101 MHz, CDCl<sub>3</sub>) δ 177.21, 174.95, 167.54, 154.74, 144.00, 138.13, 135.86, 132.50, 131.58, 130.72, 129.57, 129.54, 129.15, 128.99, 128.93, 128.68, 127.53, 127.00, 126.92, 125.35, 123.58, 123.38, 119.31, 107.49, 70.62, 66.31, 60.88, 60.06, 58.76, 26.26, 13.14; HRMS (ESI) *m/z* Calcd. for C<sub>35</sub>H<sub>30</sub>BrN<sub>4</sub>O<sub>4</sub><sup>+</sup> ([M+H]<sup>+</sup>) 649.1445, Found 649.1438; Enantiomeric excess was determined to be 97% (determined by HPLC using chiral AD-H column, hexane/2-propanol = 70/30, λ = 254 nm, 30 °C, 0.8 mL/min, *t*<sub>major</sub> = 13.8 min, *t*<sub>minor</sub> = 17.1 min).

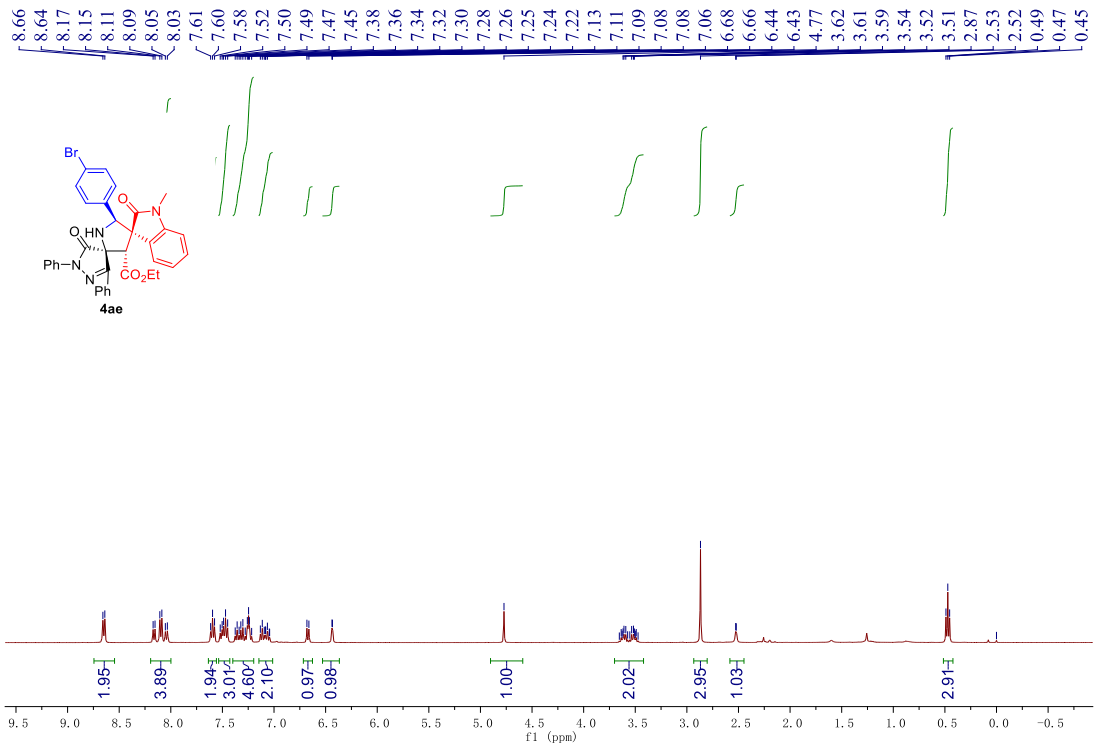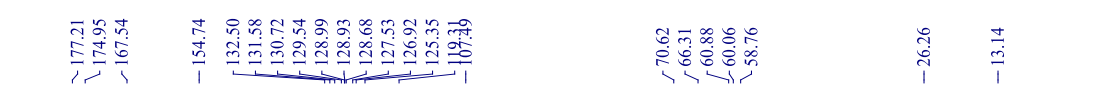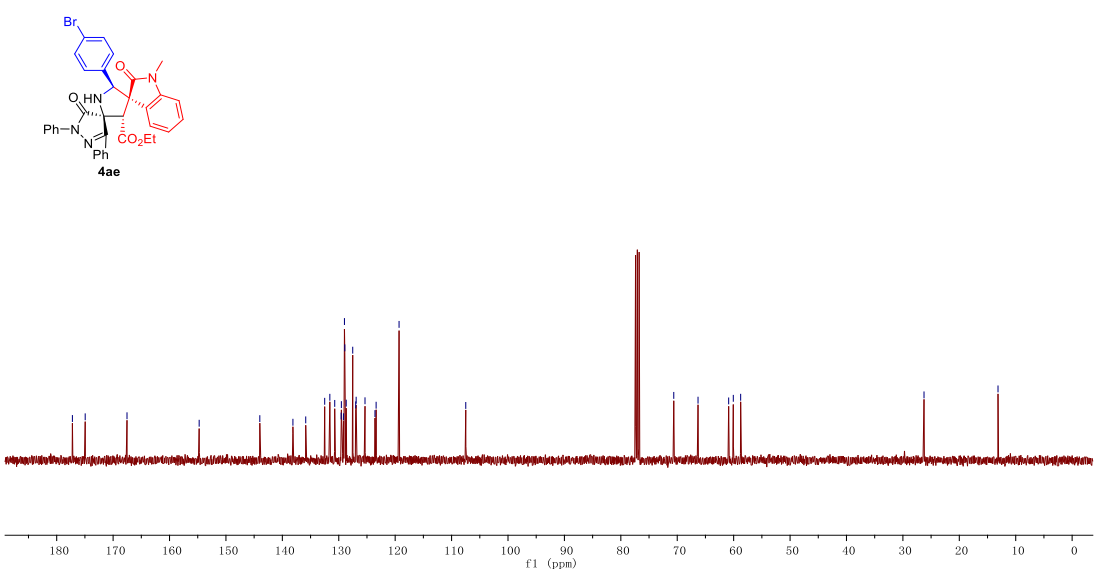

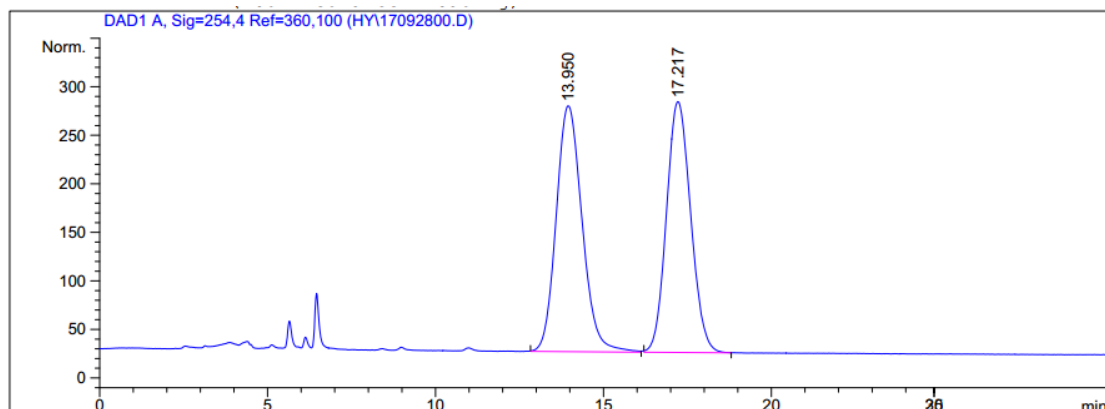

| Peak # | RetTime [min] | Type | Width [min] | Area [mAU*s] | Height [mAU] | Area %  |
|--------|---------------|------|-------------|--------------|--------------|---------|
| 1      | 13.950        | BB   | 0.8378      | 1.35765e4    | 253.11127    | 51.1867 |
| 2      | 17.217        | BB   | 0.7808      | 1.29470e4    | 258.30658    | 48.8133 |

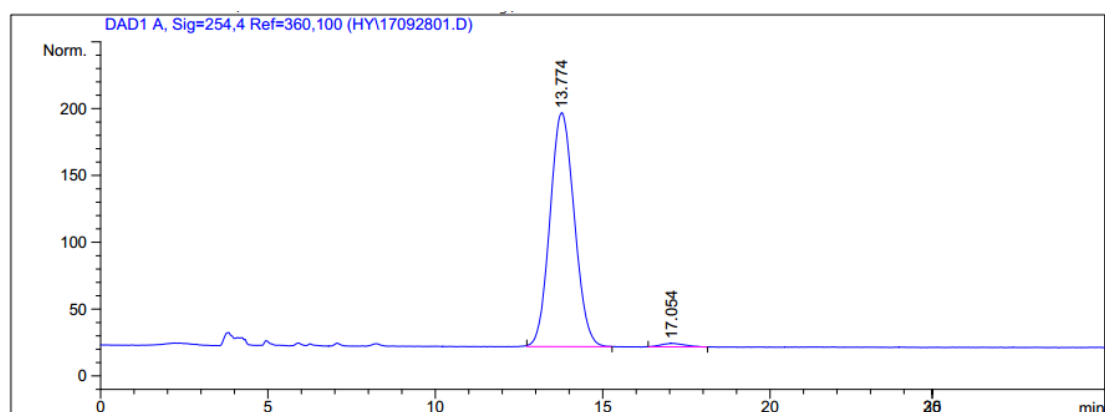

| Peak # | RetTime [min] | Type | Width [min] | Area [mAU*s] | Height [mAU] | Area %  |
|--------|---------------|------|-------------|--------------|--------------|---------|
| 1      | 13.774        | BB   | 0.7935      | 8843.50977   | 175.01552    | 98.5319 |
| 2      | 17.054        | BB   | 0.6200      | 131.76395    | 2.63205      | 1.4681  |

#### 4af

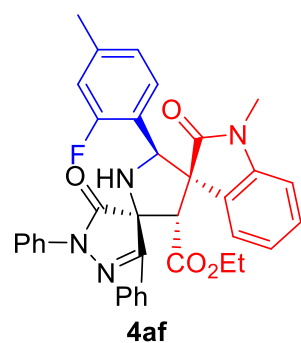

Prepared according to the procedure within 94 h as White solid (108.5 mg, 90% yield, dr > 20:1). mp 126.3 – 126.7 °C;  $[\alpha]_D^{20} = -328.93$  (*c* 0.76, CH<sub>2</sub>Cl<sub>2</sub>); <sup>1</sup>H NMR (400 MHz, CDCl<sub>3</sub>) δ 8.66 (d, *J* = 7.6 Hz, 2H), 8.03 – 8.18 (m, 3H), 7.73 (dd, *J* = 7.7 Hz, 1H), 7.40 – 7.64 (m, 5H), 7.21 – 7.30 (m, 2H), 7.14 (m, *J* = 7.5 Hz, 1H), 6.96 (d, *J* = 7.9 Hz, 1H), 6.70 (d, *J* = 7.7 Hz, 1H), 6.59 (d, *J* = 11.1 Hz, 1H), 6.24 (s, 1H), 4.72 (s, 1H), 3.67 – 3.42 (m, 2H), 2.90 (s, 3H), 2.59 (s, 1H), 2.26 (s, 3H), 0.48 (t, *J* = 7.1 Hz, 3H); <sup>19</sup>F NMR (470 MHz, CDCl<sub>3</sub>) δ -117.64; <sup>13</sup>C NMR (101 MHz, CDCl<sub>3</sub>) δ 177.56, 175.01, 167.54, 159.22, 154.91, 143.77, 139.85, 138.15, 130.71, 129.54, 129.28 (*J* = 2.8 Hz), 128.97, 128.91, 128.43, 127.55,

125.85, 125.31, 124.64 (J = 2.6 Hz), 123.39, 119.27, 115.10 (J = 21.1 Hz), 107.22, 70.74, 62.07, 60.86, 59.83, 58.95, 26.23, 21.04, 13.11; HRMS (ESI) m/z Calcd. for C<sub>36</sub>H<sub>32</sub>FN<sub>4</sub>O<sub>4</sub><sup>+</sup> ([M+H]<sup>+</sup>) 603.2402, Found 603.2390; Enantiomeric excess was determined to be 90 % (determined by HPLC using chiral AD-H column, hexane/2-propanol = 70/30, λ = 254 nm, 30 °C, 0.8 mL/min, t<sub>major</sub> = 18.4 min, t<sub>minor</sub> = 16.1 min).

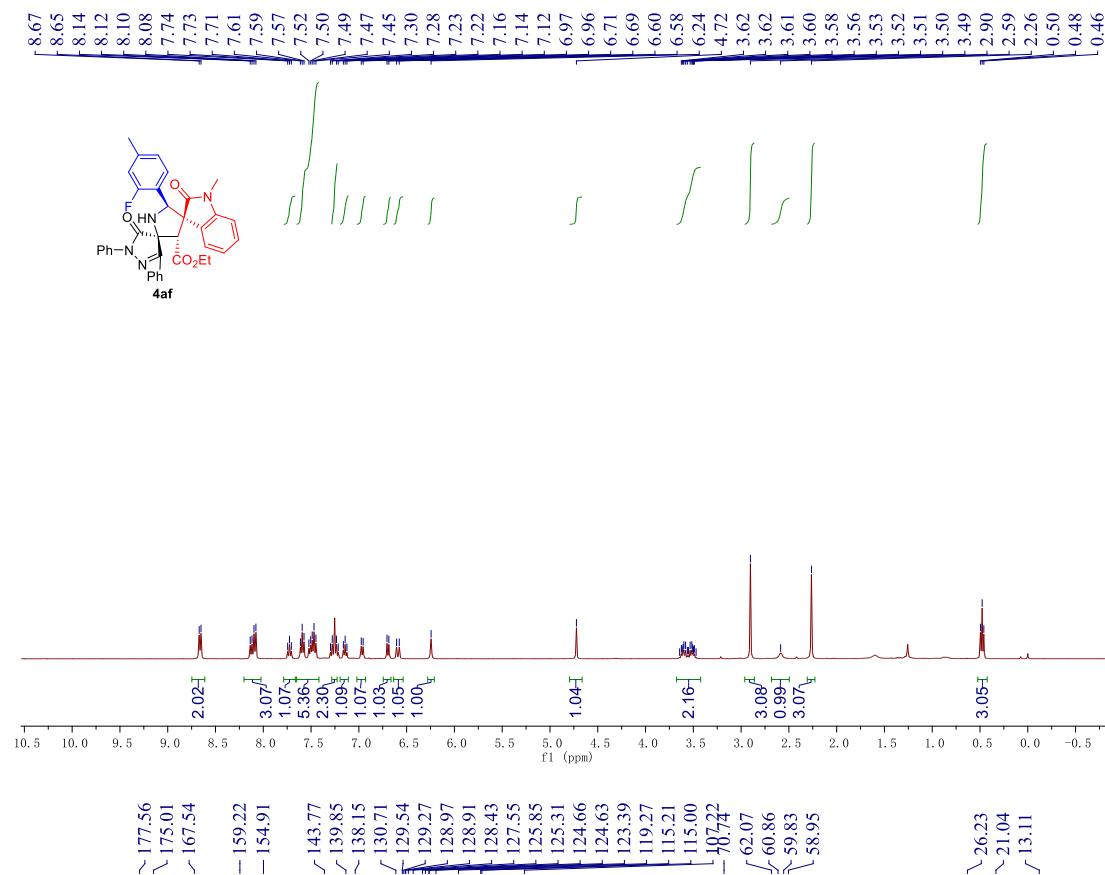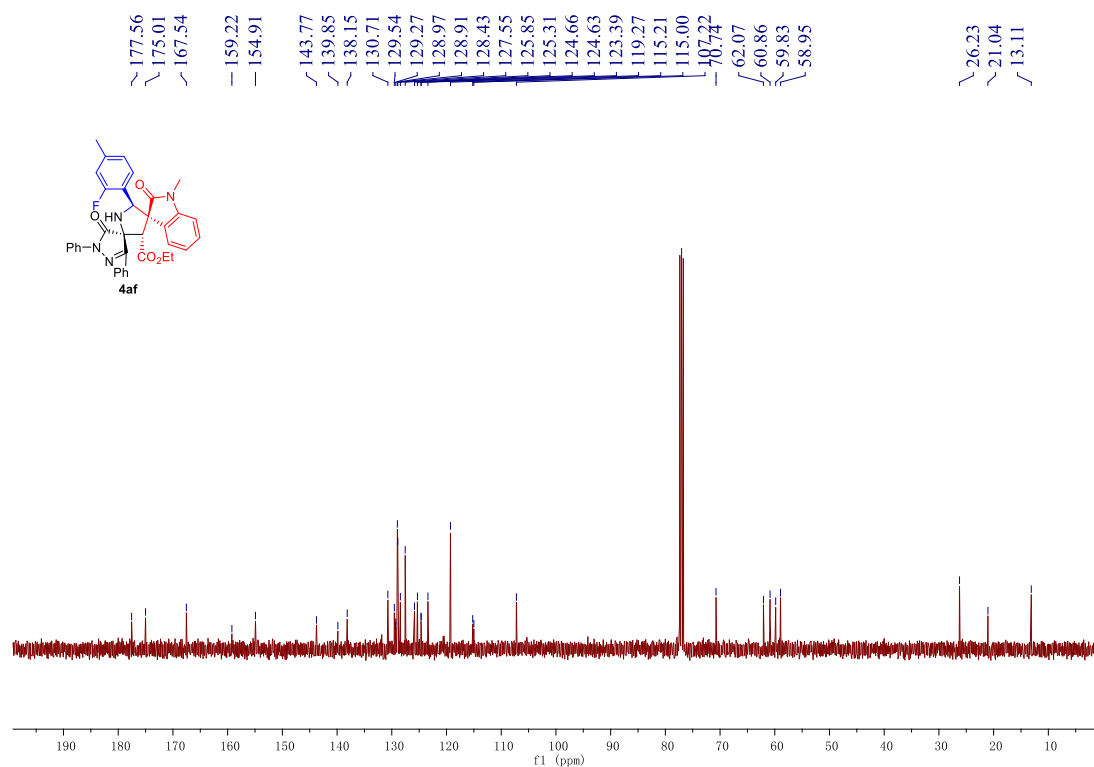



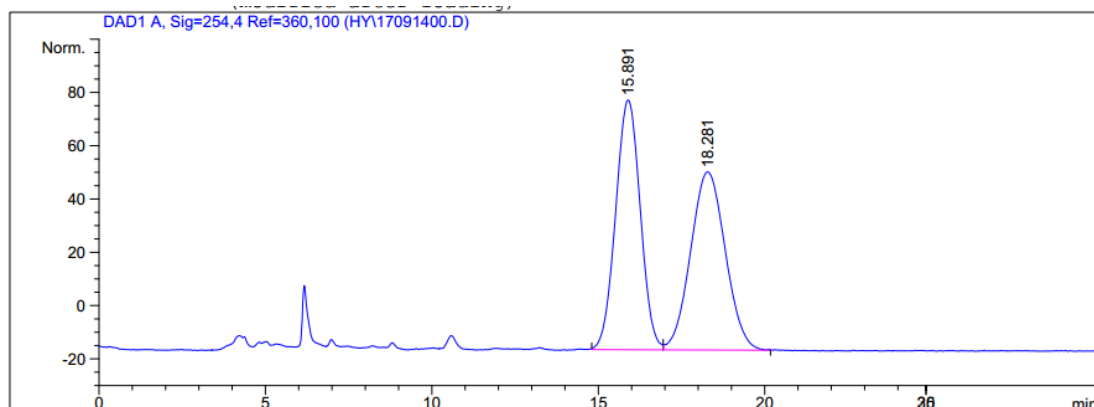

| Peak # | RetTime [min] | Type | Width [min] | Area [mAU*s] | Height [mAU] | Area %  |
|--------|---------------|------|-------------|--------------|--------------|---------|
| 1      | 15.891        | BV   | 0.8036      | 4817.09082   | 93.72789     | 49.8363 |
| 2      | 18.281        | VB   | 1.0983      | 4848.74561   | 66.83953     | 50.1637 |

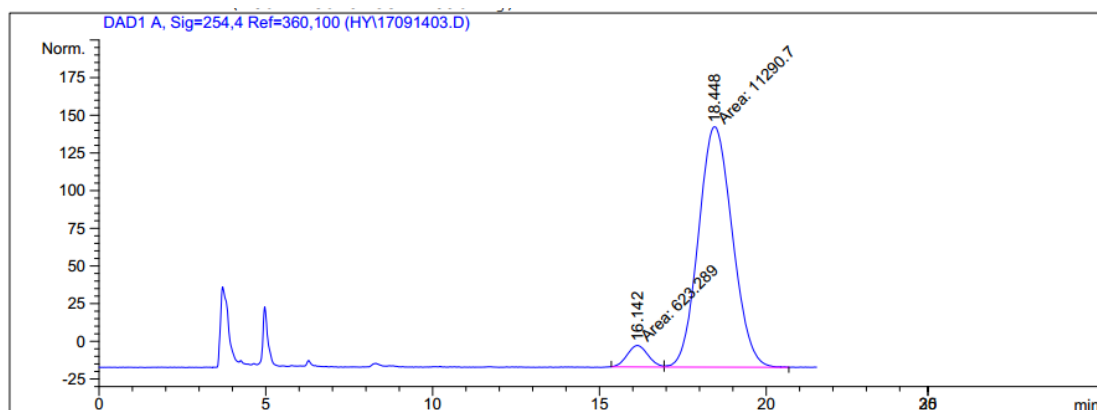

| Peak # | RetTime [min] | Type | Width [min] | Area [mAU*s] | Height [mAU] | Area %  |
|--------|---------------|------|-------------|--------------|--------------|---------|
| 1      | 16.142        | MM   | 0.7214      | 623.28943    | 14.39915     | 5.2316  |
| 2      | 18.448        | MM   | 1.1794      | 1.12907e4    | 159.55942    | 94.7684 |

#### 4ag

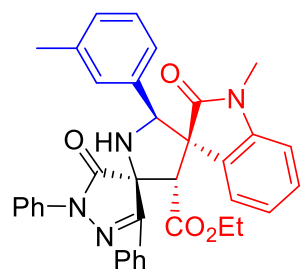

**4ag**

Prepared according to the procedure within 108 h as White solid (113.4 mg, 97% yield, dr > 20:1). mp 130.2 – 131.1 °C;  $[\alpha]_D^{19} = -303.20$  (c 0.44, CH<sub>2</sub>Cl<sub>2</sub>); <sup>1</sup>H NMR (400 MHz, CDCl<sub>3</sub>) δ 8.67 (d, *J* = 7.6 Hz, 2H), 8.08 (d, *J* = 7.7 Hz, 3H), 7.70 – 7.59 (m, 2H), 7.53 – 7.43 (m, 3H), 7.29 (dd, *J* = 7.5 Hz, 1H), 7.22 (d, *J* = 7.4 Hz, 1H), 7.15 (dd, *J* = 7.5 Hz, 1H), 7.07 (dd, *J* = 7.5 Hz, 1H), 6.99 (d, *J* = 7.5 Hz, 1H), 6.91 (d, *J* = 7.6 Hz, 1H), 6.78 (s, 1H), 6.68 (d, *J* = 7.7 Hz, 1H), 5.87 (s, 1H), 4.69 (s, 1H), 3.70 – 3.45 (m, 2H), 2.79 (s, 3H), 2.57 (s, 1H), 2.19 (s, 3H), 0.49 (t, *J* = 7.1 Hz, 3H); <sup>13</sup>C NMR (101 MHz, CDCl<sub>3</sub>) δ 177.44, 175.09, 167.73, 155.14, 143.93, 138.18,

137.31, 136.40, 130.70, 129.82, 129.59, 128.99, 128.88, 128.81, 128.62, 127.80, 127.65, 127.27, 125.64, 125.30, 123.68, 123.40, 119.28, 107.32, 70.85, 69.16, 60.84, 60.39, 58.48, 26.05, 21.44, 13.17; HRMS (ESI)  $m/z$  Calcd. for  $C_{36}H_{33}N_4O_4^+$  ( $[M+H]^+$ ) 585.2496, Found 585.2506; Enantiomeric excess was determined to be 93% (determined by HPLC using chiral AD-H column, hexane/2-propanol = 70/30,  $\lambda = 254$  nm, 30 °C, 0.8 mL/min,  $t_{major} = 9.9$  min,  $t_{minor} = 18.9$  min).

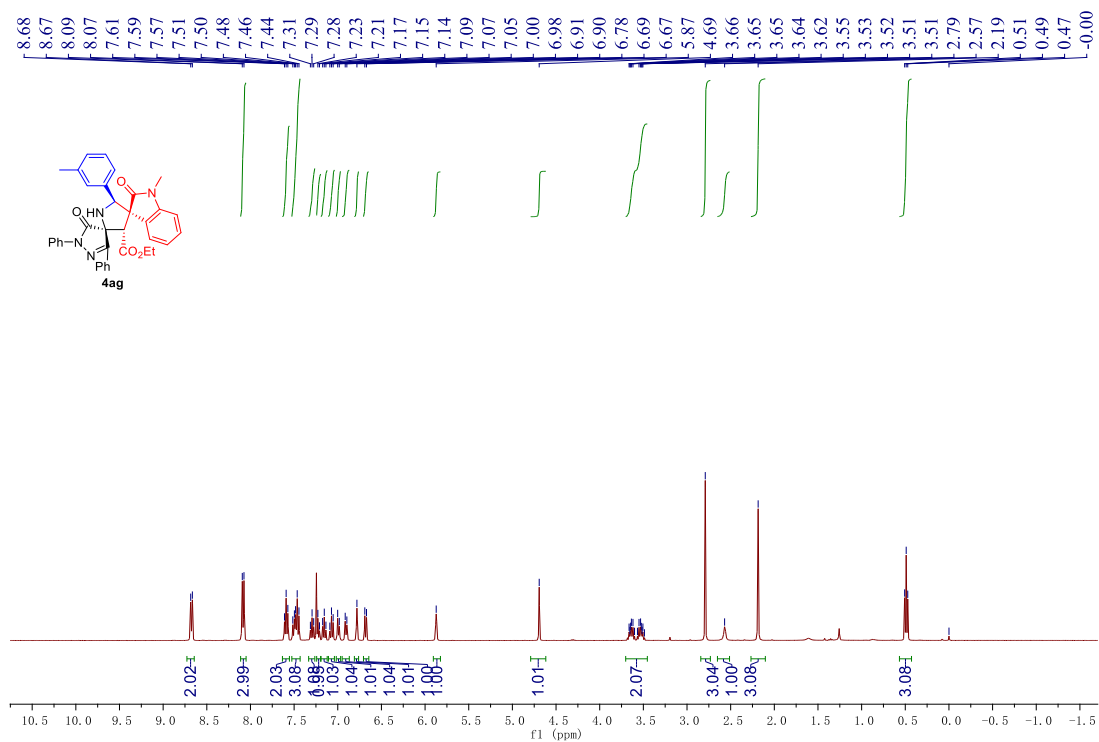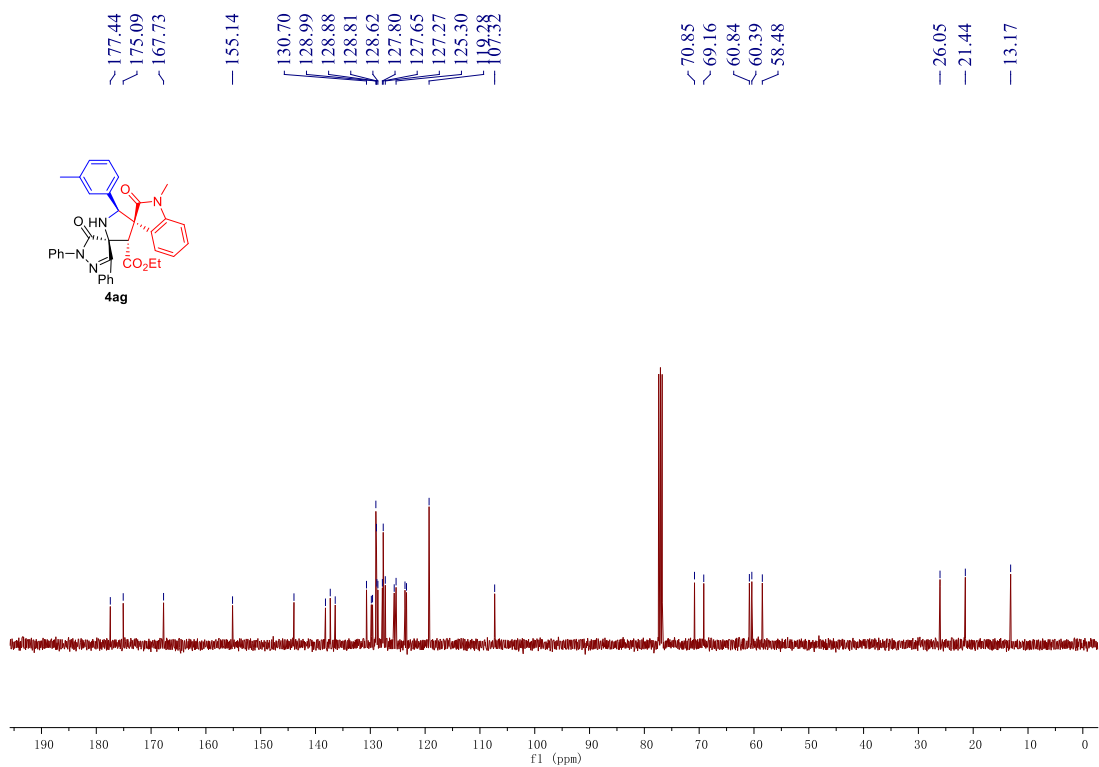

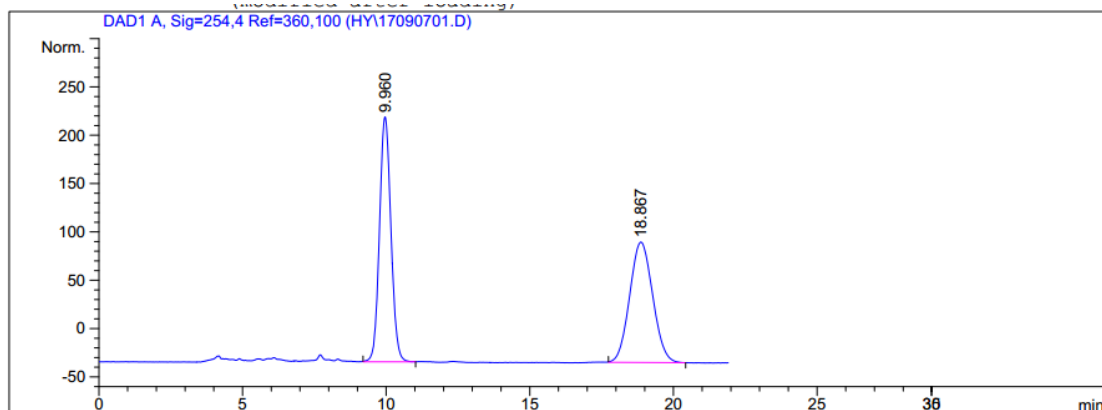

| Peak # | RetTime [min] | Type | Width [min] | Area [mAU*s] | Height [mAU] | Area %  |
|--------|---------------|------|-------------|--------------|--------------|---------|
| 1      | 9.960         | BB   | 0.4303      | 6999.81592   | 253.41316    | 50.2397 |
| 2      | 18.867        | BB   | 0.8731      | 6933.03271   | 124.60486    | 49.7603 |

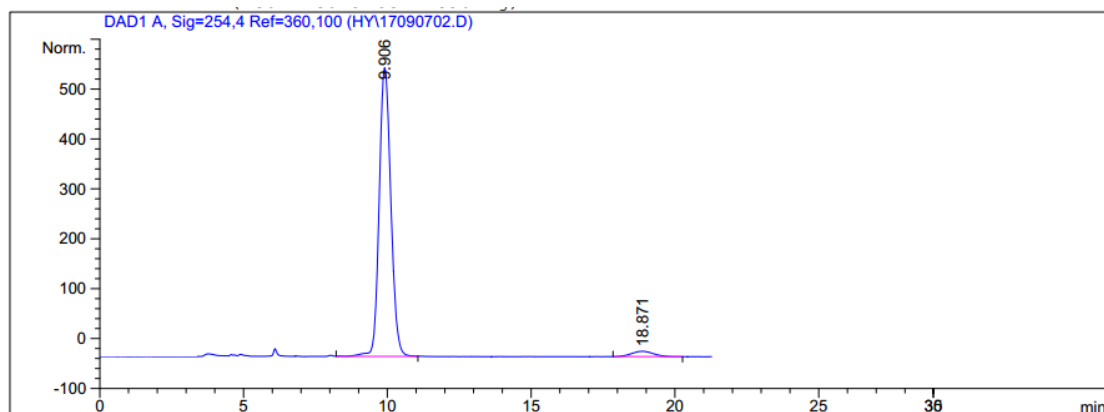

| Peak # | RetTime [min] | Type | Width [min] | Area [mAU*s] | Height [mAU] | Area %  |
|--------|---------------|------|-------------|--------------|--------------|---------|
| 1      | 9.906         | VB   | 0.4406      | 1.62986e4    | 578.75165    | 96.6105 |
| 2      | 18.871        | PB   | 0.8114      | 571.81323    | 10.77078     | 3.3895  |

#### 4ah

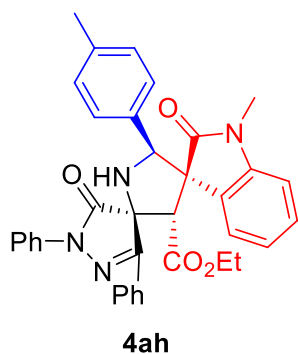

Prepared according to the procedure within 96 h as White solid (114.5 mg, 98% yield, dr > 20:1). mp 126.3 – 127.0 °C;  $[\alpha]_D^{20} = -281.98$  (*c* 1.09, CH<sub>2</sub>Cl<sub>2</sub>); <sup>1</sup>H NMR (400 MHz, CDCl<sub>3</sub>) δ 8.64 (d, *J* = 7.5 Hz, 2H), 8.12 – 8.05 (m, 3H), 7.60 – 7.50 (m, 2H), 7.45 (dd, *J* = 14.8, 7.3 Hz, 3H), 7.30 – 7.17 (m, 2H), 7.12 (dd, *J* = 7.5 Hz, 1H), 6.94 (q, *J* = 8.2 Hz, 4H), 6.65 (d, *J* = 7.7 Hz, 1H), 5.82 (s, 1H), 4.65 (s, 1H), 3.75 – 3.37 (m, 2H), 2.77 (s, 3H), 2.38 (s, 1H), 2.21 (s, 3H), 0.45 (t, *J* = 7.1 Hz, 3H); <sup>13</sup>C NMR (101 MHz, CDCl<sub>3</sub>) δ 177.57, 175.08, 167.70, 155.13, 143.88, 138.23, 137.74, 133.52, 130.71,

129.84, 129.60, 129.02, 128.88, 128.62, 128.58, 127.64, 126.57, 125.67, 125.26, 123.40, 119.19, 107.39, 70.82, 68.99, 60.80, 60.37, 58.55, 26.07, 21.16, 13.18; HRMS (ESI)  $m/z$  Calcd. for  $C_{36}H_{33}N_4O_4^+$  ( $[M+H]^+$ ) 585.2496, Found 585.2487; Enantiomeric excess was determined to be 92% (determined by HPLC using chiral AD-H column, hexane/2-propanol = 70/30,  $\lambda = 254$  nm, 30 °C, 0.8 mL/min,  $t_{major} = 16.8$  min,  $t_{minor} = 19.7$  min).

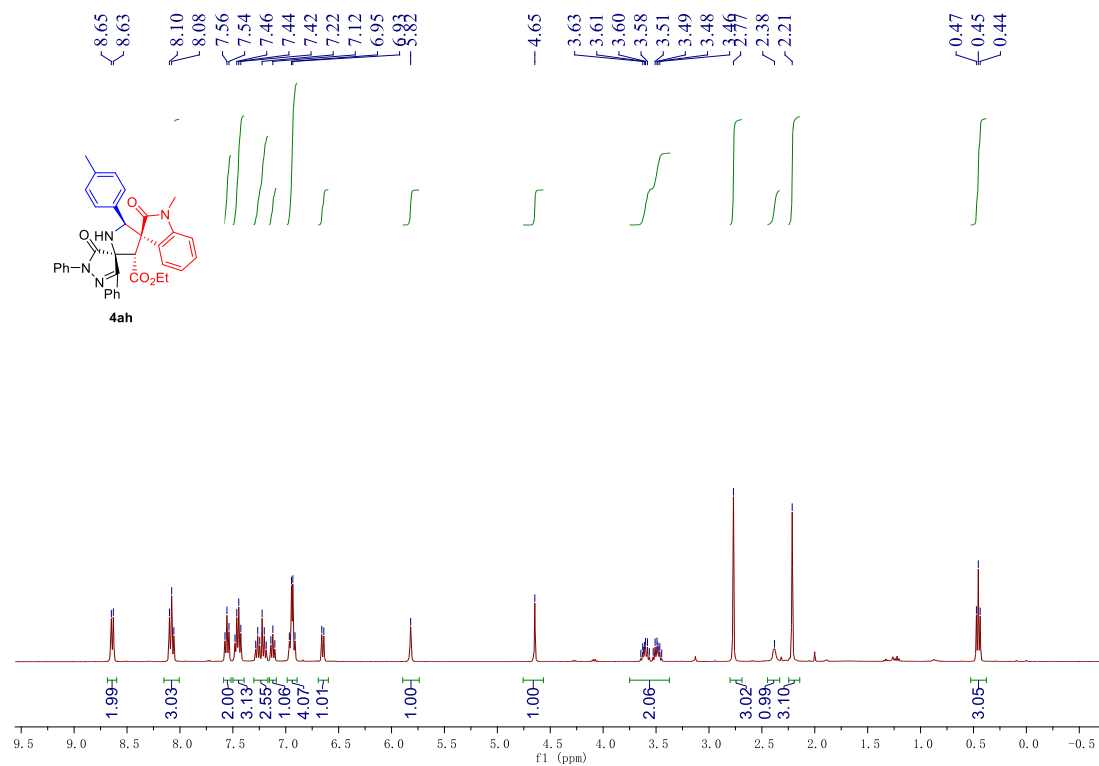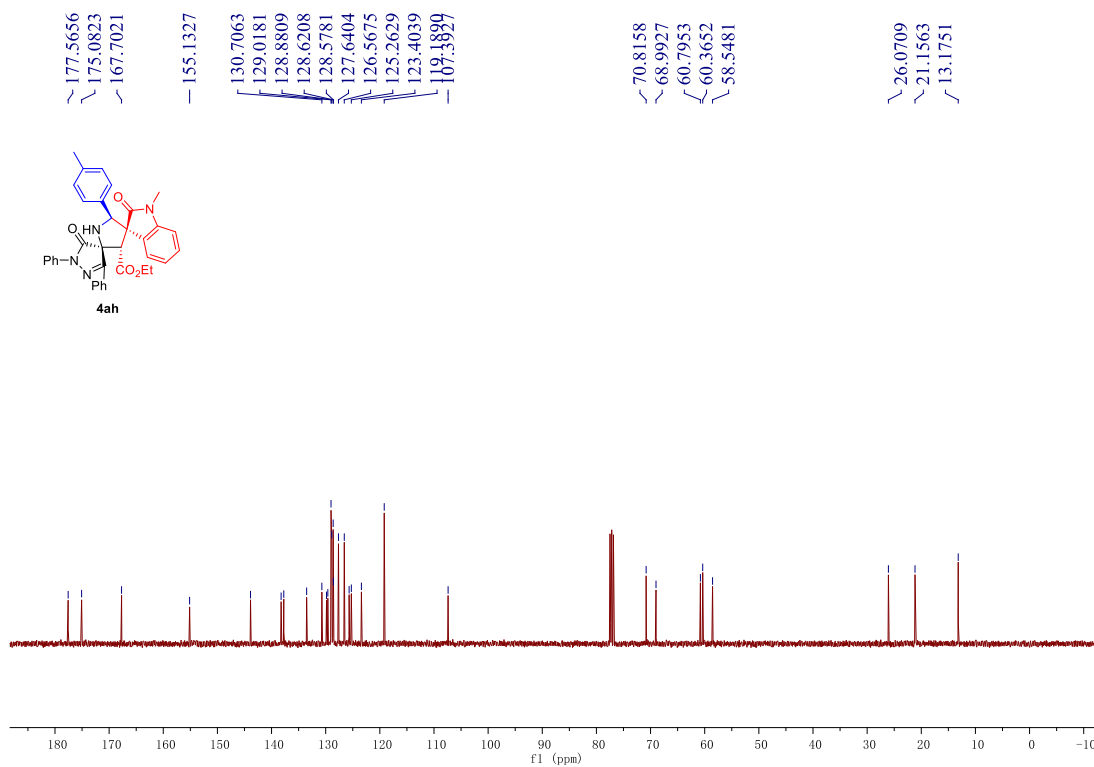

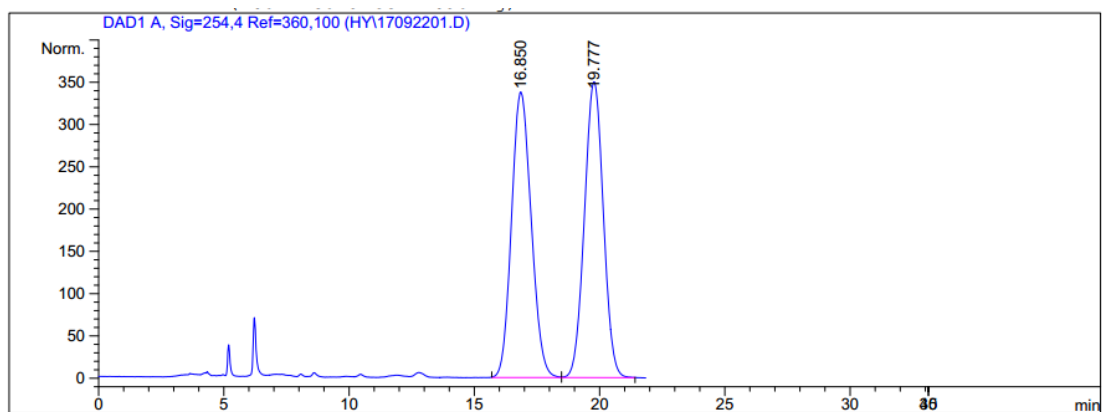

| Peak # | RetTime [min] | Type | Width [min] | Area [mAU*s] | Height [mAU] | Area %  |
|--------|---------------|------|-------------|--------------|--------------|---------|
| 1      | 16.850        | BV   | 0.8485      | 1.84287e4    | 337.79550    | 50.1113 |
| 2      | 19.777        | VB   | 0.8279      | 1.83468e4    | 349.82687    | 49.8887 |

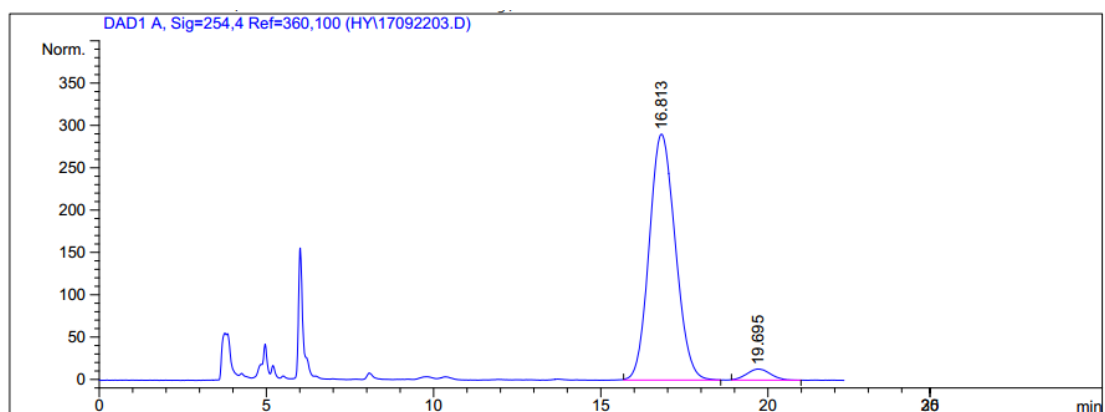

| Peak # | RetTime [min] | Type | Width [min] | Area [mAU*s] | Height [mAU] | Area %  |
|--------|---------------|------|-------------|--------------|--------------|---------|
| 1      | 16.813        | BB   | 0.8401      | 1.57387e4    | 290.47037    | 96.0302 |
| 2      | 19.695        | BB   | 0.7483      | 650.62445    | 13.08059     | 3.9698  |

#### 4ai

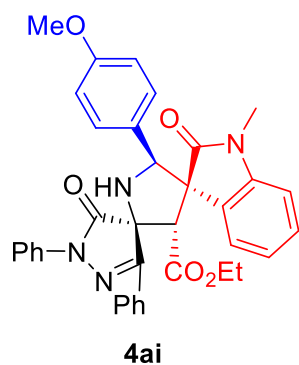

Prepared according to the procedure within 84 h as White solid (91.2 mg, 76% yield, dr > 20:1). mp 122.2 – 123.5 °C;  $[\alpha]_D^{19} = -221.5$  (c 0.53, CH<sub>2</sub>Cl<sub>2</sub>); <sup>1</sup>H NMR (400 MHz, CDCl<sub>3</sub>) δ 8.74 – 8.66 (m, 2H), 8.18 – 8.08 (m, 3H), 7.70 – 7.58 (m, 2H), 7.54 – 7.47 (m, 3H), 7.32 (td, *J* = 7.7, 0.9 Hz, 1H), 7.26 (dd, *J* = 7.4 Hz, 1H), 7.18 (td, *J* = 7.6, 0.7 Hz, 1H), 7.05 (d, *J* = 8.6 Hz, 2H), 6.69 – 6.78 (m, 3H), 5.89 (s, 1H), 4.72 (s, 1H), 3.75 (s, 3H), 3.71 – 3.50 (m, 2H), 2.85 (s, 3H), 2.60 (s, 1H), 0.51 (t, *J* = 7.1 Hz, 3H); <sup>13</sup>C NMR (101 MHz, CDCl<sub>3</sub>) δ 177.61, 175.09, 167.73, 159.42, 155.15, 143.83, 138.19, 130.71, 129.78, 129.61, 128.99, 128.87, 128.58, 128.41, 127.98, 127.64, 125.62, 125.29, 123.39, 119.24, 113.26, 107.40, 70.77, 68.90, 60.82, 60.36, 58.39, 55.13, 26.12,

13.17; HRMS (ESI)  $m/z$  Calcd. for  $C_{36}H_{33}N_4O_5^+$  ( $[M+H]^+$ ) 601.2445, Found 601.2441; Enantiomeric excess was determined to be 81% (determined by HPLC using chiral AD-H column, hexane/2-propanol = 70/30,  $\lambda = 254$  nm, 30 °C, 0.8 mL/min,  $t_{major} = 29.4$  min,  $t_{minor} = 25.4$  min).

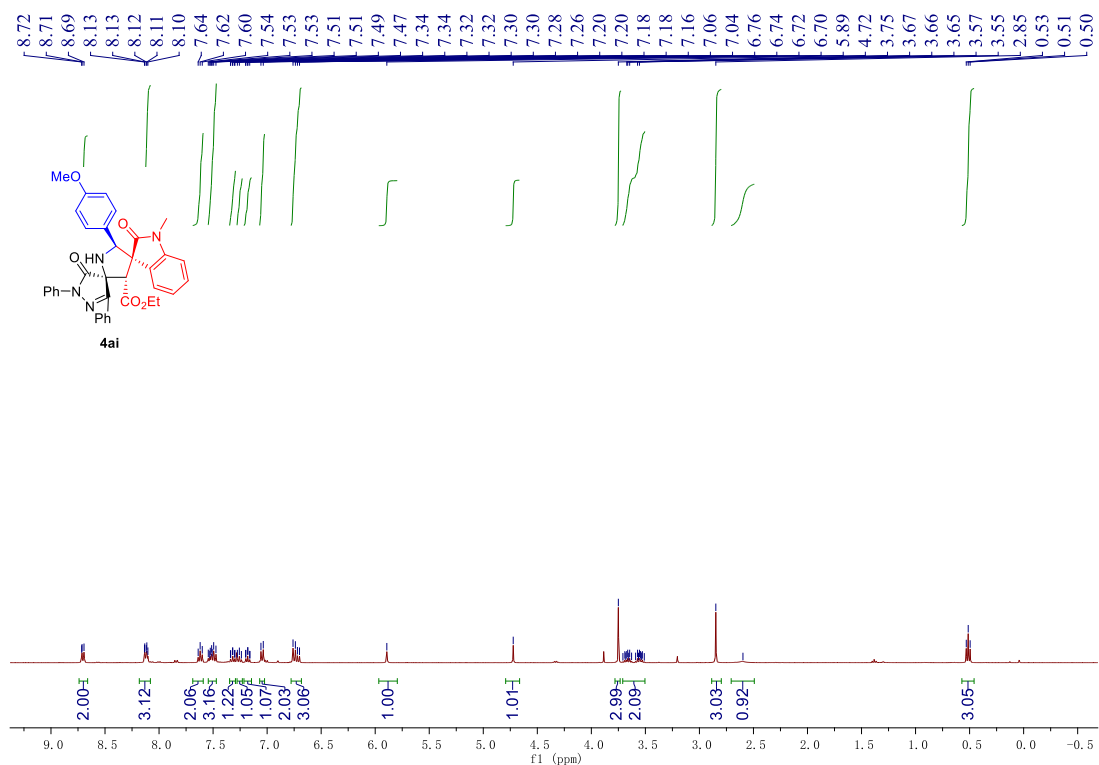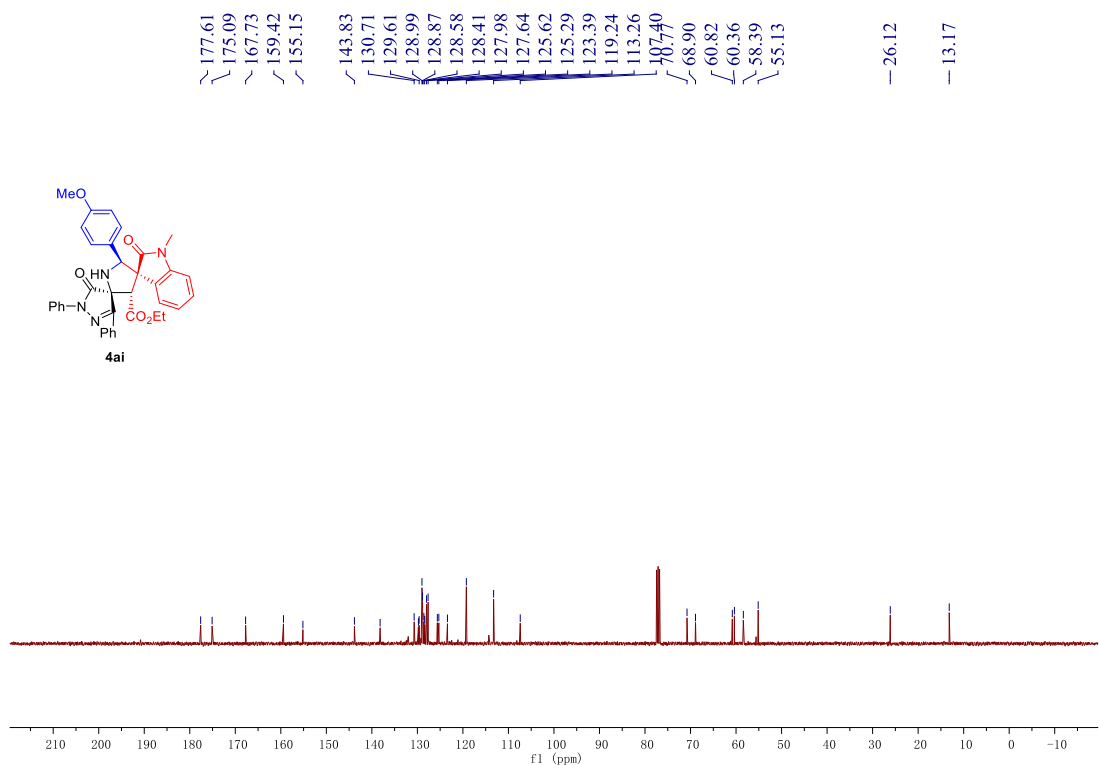

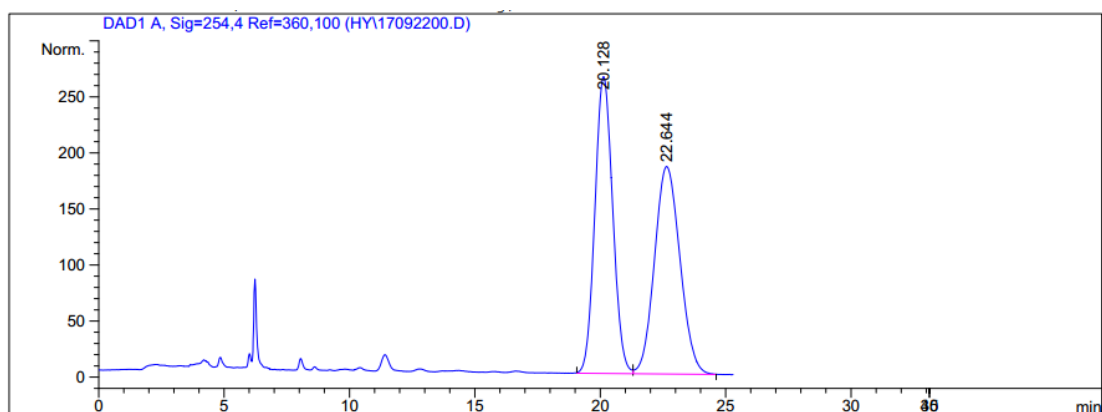

| Peak # | RetTime [min] | Type | Width [min] | Area [mAU*s] | Height [mAU] | Area %  |
|--------|---------------|------|-------------|--------------|--------------|---------|
| 1      | 20.128        | BV   | 0.7713      | 1.30542e4    | 264.73181    | 49.9903 |
| 2      | 22.644        | VB   | 1.0988      | 1.30593e4    | 185.17702    | 50.0097 |

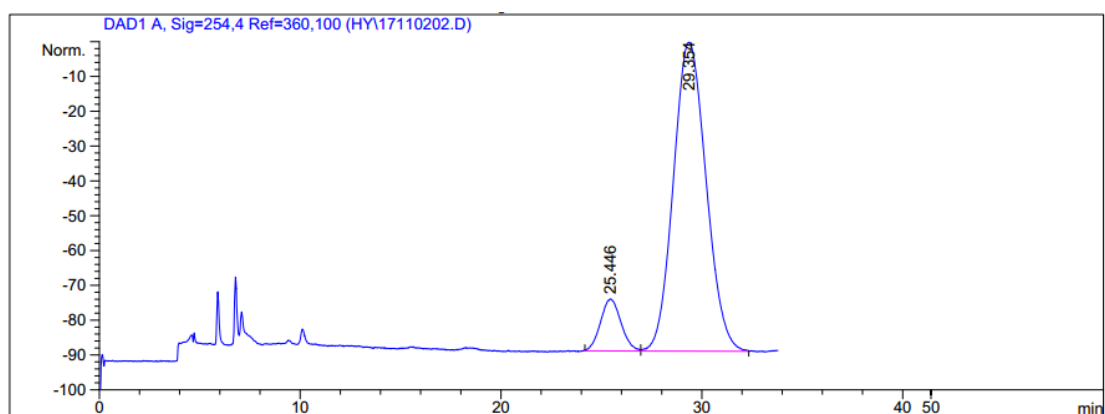

| Peak # | RetTime [min] | Type | Width [min] | Area [mAU*s] | Height [mAU] | Area %  |
|--------|---------------|------|-------------|--------------|--------------|---------|
| 1      | 25.446        | BV   | 0.8697      | 1058.59338   | 14.88562     | 9.5434  |
| 2      | 29.354        | VB   | 1.5112      | 1.00338e4    | 88.73840     | 90.4566 |

#### 4aj

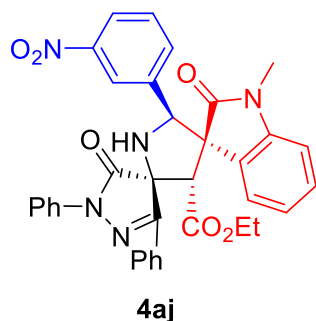

Prepared according to the procedure within 72 h as White solid (81.2 mg, 66% yield, dr > 20:1). mp 192.6 – 193.5 °C;  $[\alpha]_D^{20} = -340.00$  (*c* 0.29, CH<sub>2</sub>Cl<sub>2</sub>); <sup>1</sup>H NMR (400 MHz, CDCl<sub>3</sub>) δ 8.71 – 8.60 (m, 2H), 8.17 – 8.05 (m, 1H), 7.97 – 7.94 (m, 1H), 7.65 – 7.58 (m, 2H), 7.56 – 7.44 (m, 4H), 7.43 – 7.33 (m, 2H), 7.28 – 7.19 (m, 3H), 6.75 (d, *J* = 7.6 Hz, 1H), 6.05 (s, 1H), 4.72 (s, 1H), 3.67 – 3.49 (m, 2H), 2.82 (s, 3H), 0.50 (t, *J* = 7.1 Hz, 3H); <sup>13</sup>C NMR (101 MHz, CDCl<sub>3</sub>) δ 176.93, 174.99, 167.25, 154.82, 147.96, 143.66, 139.18, 137.95, 132.73, 130.91, 129.33, 129.25, 129.03, 128.98, 127.53, 125.76, 125.51, 123.89, 123.17, 121.80, 119.30, 107.80, 70.90, 68.04, 61.04, 60.11, 58.58, 26.18, 13.14; HRMS (ESI) *m/z* Calcd. for C<sub>35</sub>H<sub>30</sub>N<sub>5</sub>O<sub>6</sub><sup>+</sup> ([M+H]<sup>+</sup>) 616.2191, Found 616.2185;

Enantiomeric excess was determined to be 99% (determined by HPLC using chiral AD-H column, hexane/2-propanol = 70/30,  $\lambda = 254$  nm, 30 °C, 0.8 mL/min,  $t_{\text{major}} = 8.5$  min,  $t_{\text{minor}} = 14.2$  min).

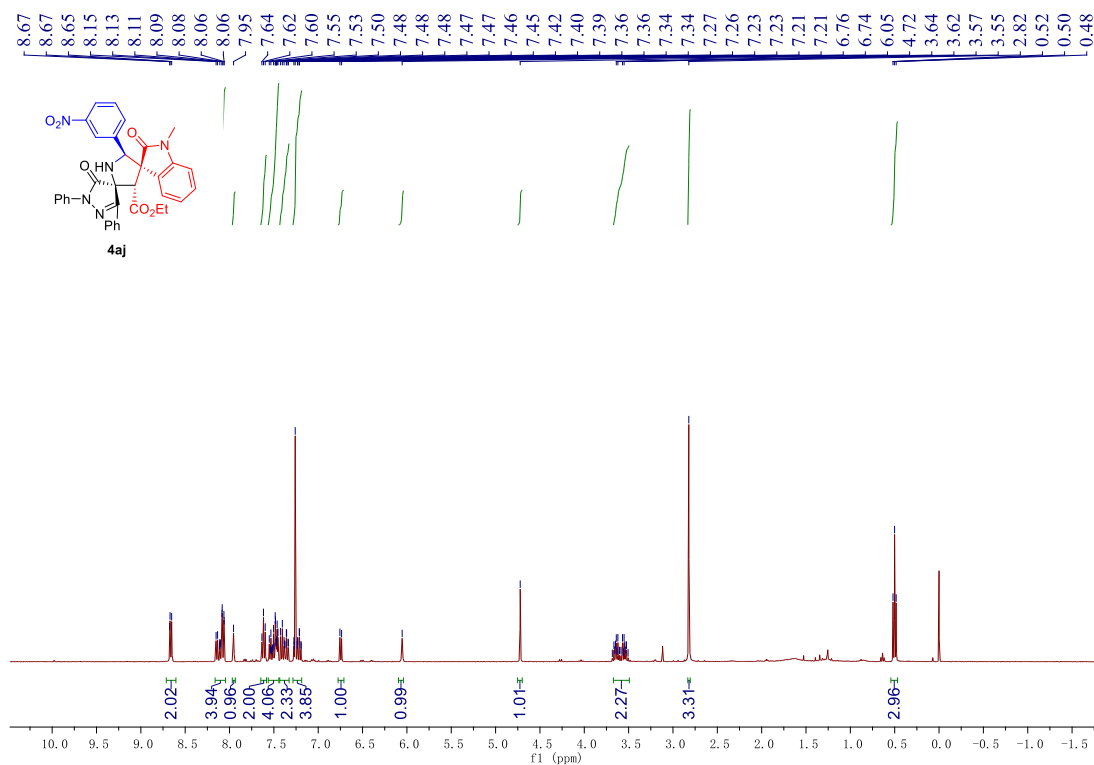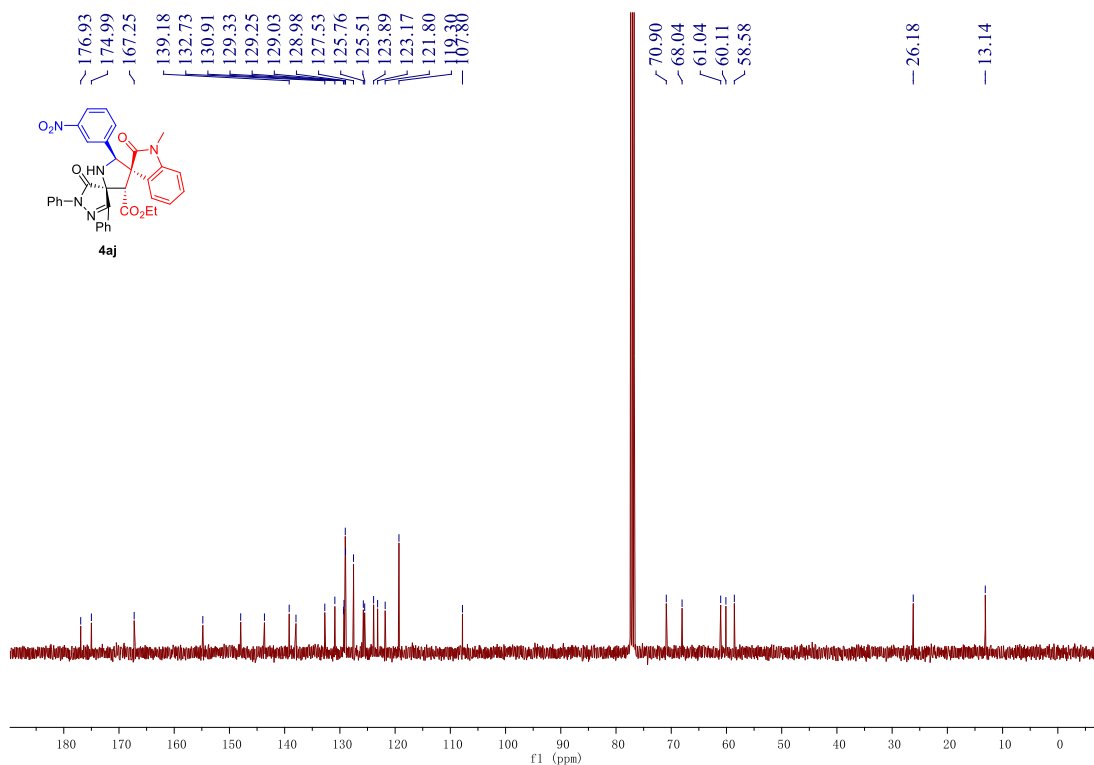



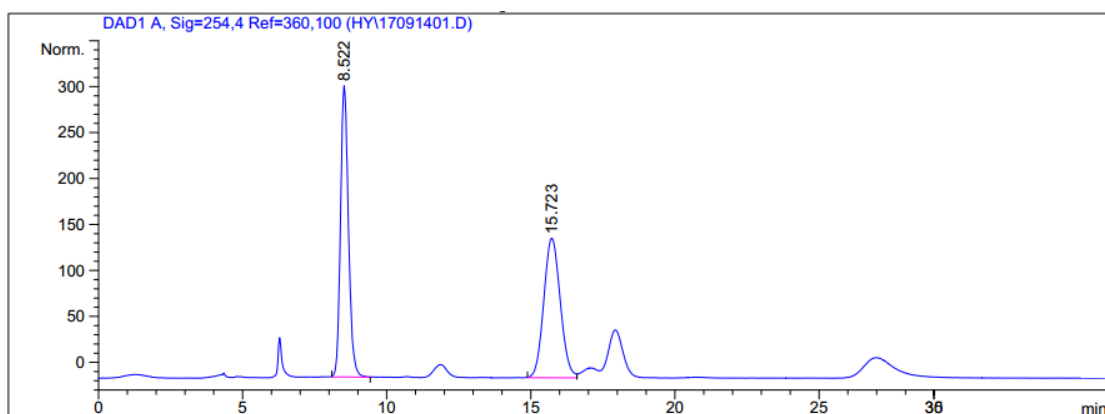

| Peak # | RetTime [min] | Type | Width [min] | Area [mAU*s] | Height [mAU] | Area %  |
|--------|---------------|------|-------------|--------------|--------------|---------|
| 1      | 8.522         | BB   | 0.2990      | 6057.80615   | 316.97592    | 50.1204 |
| 2      | 15.723        | BV   | 0.6190      | 6028.70068   | 151.89487    | 49.8796 |

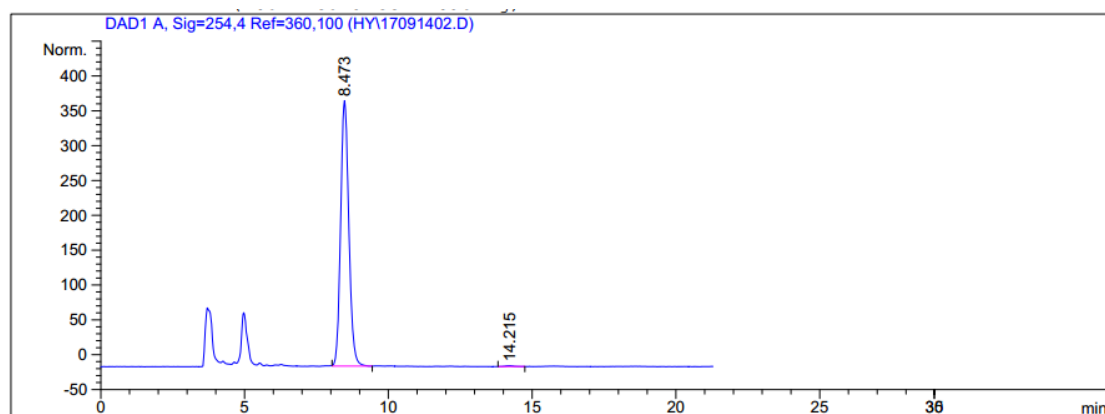

| Peak # | RetTime [min] | Type | Width [min] | Area [mAU*s] | Height [mAU] | Area %  |
|--------|---------------|------|-------------|--------------|--------------|---------|
| 1      | 8.473         | BP   | 0.3068      | 7535.39404   | 380.92163    | 99.6496 |
| 2      | 14.215        | PP   | 0.3106      | 26.50032     | 1.23373      | 0.3504  |

#### 4ak

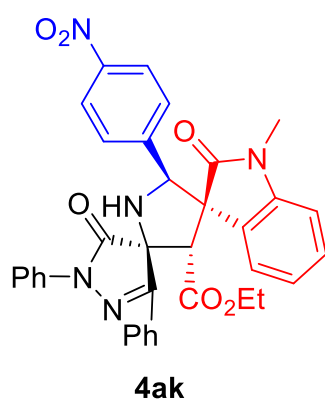

Prepared according to the procedure within 94 h as White solid (107.0 mg, 87% yield, dr > 20:1). mp 144.2 – 144.9 °C;  $[\alpha]_D^{17} = -376.20$  (*c* 0.84, CH<sub>2</sub>Cl<sub>2</sub>); <sup>1</sup>H NMR (400 MHz, CDCl<sub>3</sub>) δ 8.68 – 8.57 (m, 2H), 8.15 – 8.00 (m, 5H), 7.66 – 7.40 (m, 5H), 7.37 – 7.09 (m, 5H), 6.73 (d, *J* = 7.7 Hz, 1H), 6.01 (d, *J* = 3.3 Hz, 1H), 4.68 (s, 1H), 3.68 – 3.46 (m, 2H), 2.86 (d, *J* = 3.9 Hz, 1H), 2.82 (s, 3H), 0.47 (t, *J* = 7.1 Hz, 3H); <sup>13</sup>C NMR (101 MHz, CDCl<sub>3</sub>) δ 176.88, 175.01, 167.20, 154.78, 147.77, 144.27, 143.75, 137.89, 130.90, 129.34, 129.21, 129.03, 128.96, 128.95, 127.57, 127.52, 125.68, 125.52, 123.77, 123.19, 119.26, 107.79, 70.93, 68.12, 61.05,

60.16, 58.67, 26.20, 13.13; HRMS (ESI)  $m/z$  Calcd. for  $C_{35}H_{30}N_5O_6^+$  ( $[M+H]^+$ ) 616.2191, Found 616.2181; Enantiomeric excess was determined to be 99% (determined by HPLC using chiral AD-H column, hexane/2-propanol = 70/30,  $\lambda = 254$  nm, 30 °C, 0.8 mL/min,  $t_{major} = 15.9$  min,  $t_{minor} = 31.7$  min).

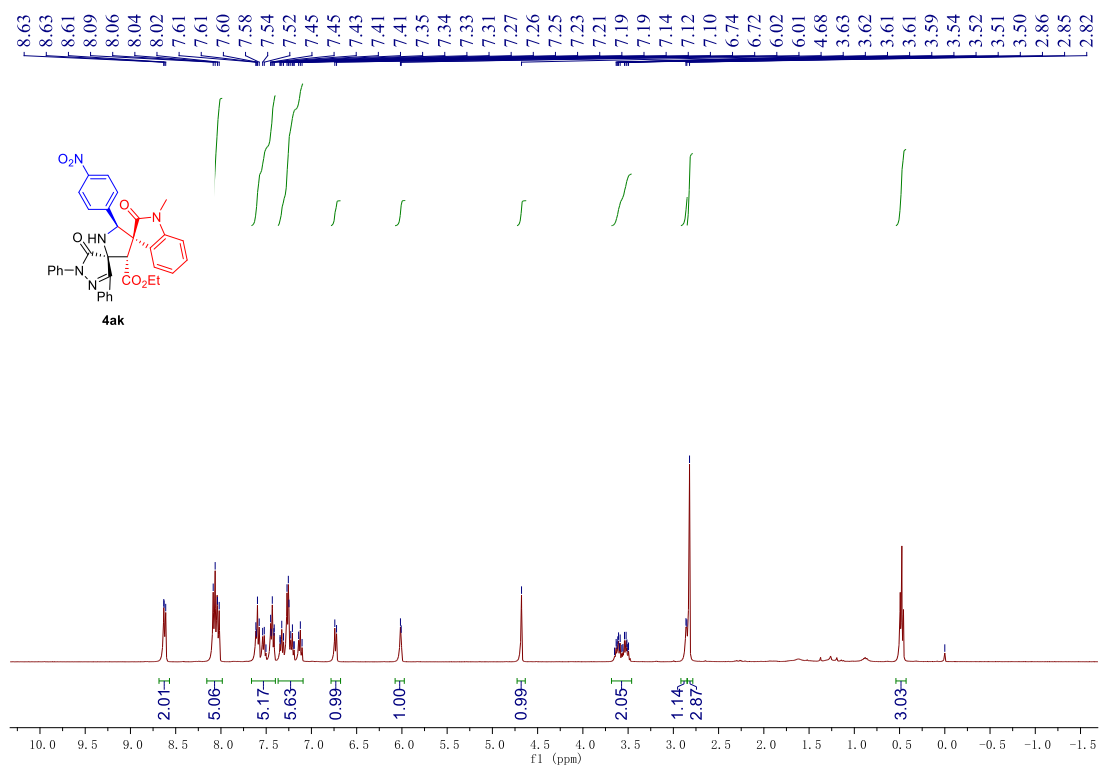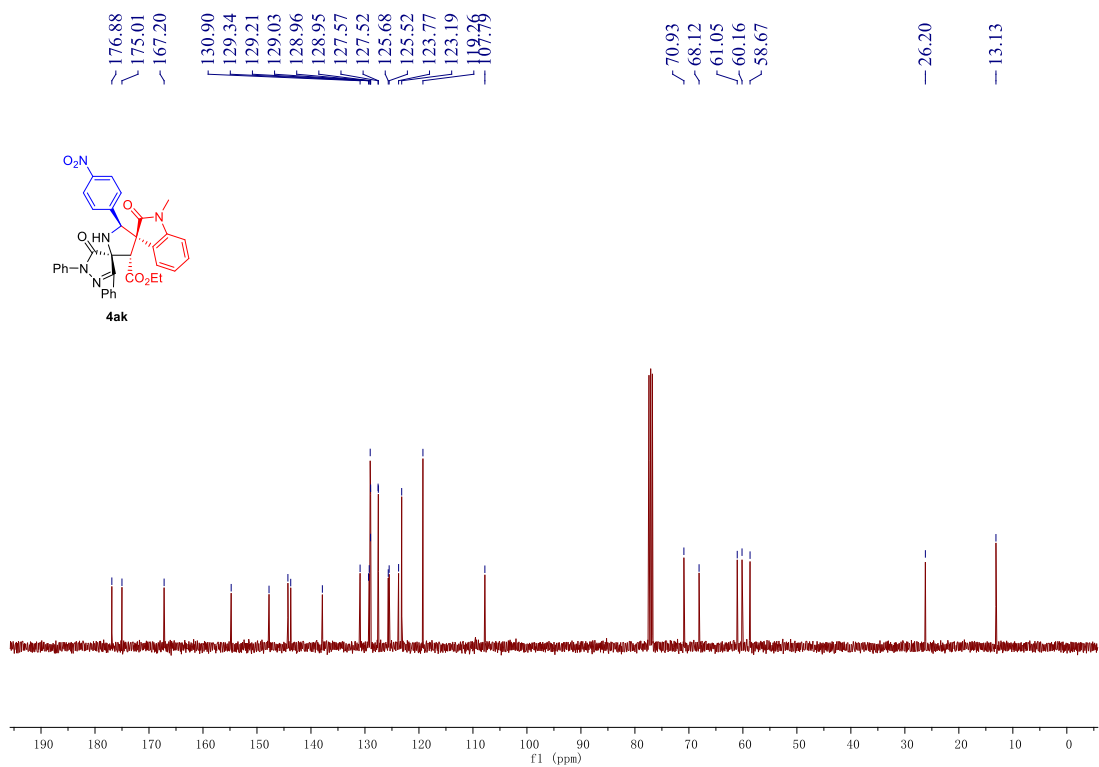

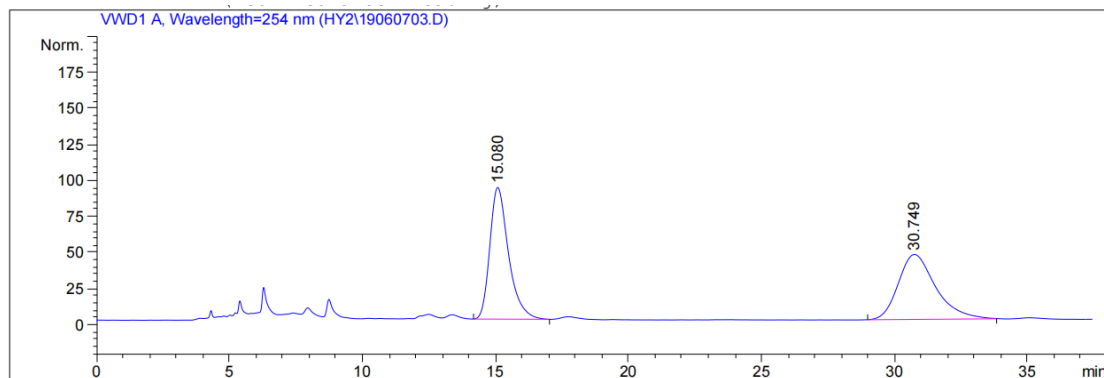

| Peak # | RetTime [min] | Type | Width [min] | Area mAU *s | Height [mAU] | Area %  |
|--------|---------------|------|-------------|-------------|--------------|---------|
| 1      | 15.080        | BB   | 0.7405      | 4489.63232  | 91.40505     | 50.4835 |
| 2      | 30.749        | BB   | 1.4505      | 4403.63184  | 45.05145     | 49.5165 |

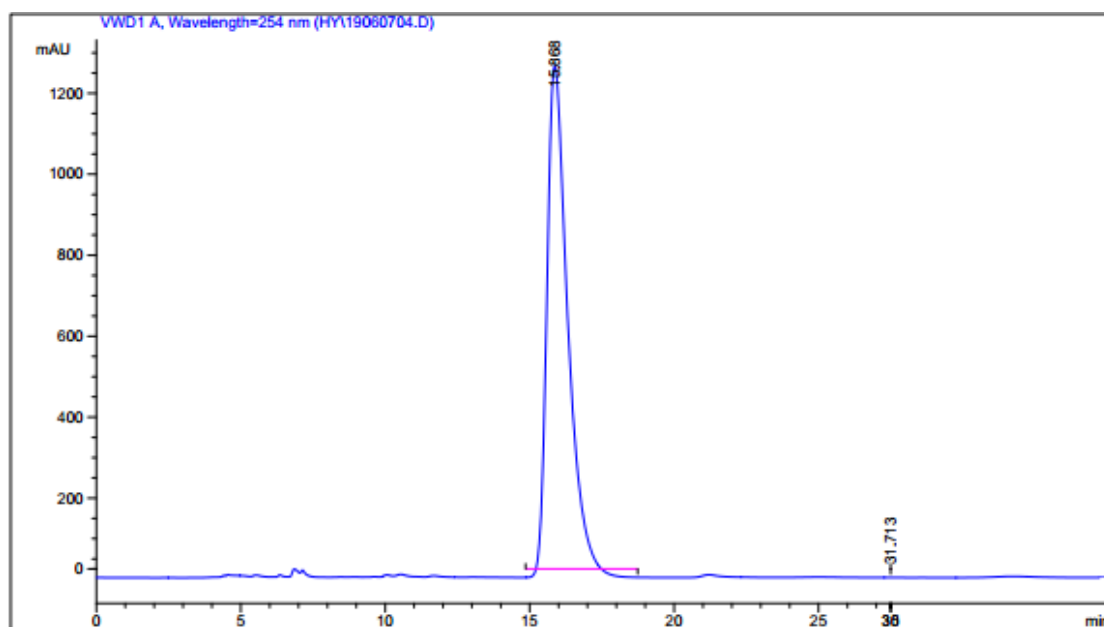

| Peak # | RetTime [min] | Type | Width [min] | Area mAU *s | Height [mAU] | Area %  |
|--------|---------------|------|-------------|-------------|--------------|---------|
| 1      | 15.868        | BB   | 0.7582      | 6.40252e4   | 1264.48511   | 99.5630 |
| 2      | 31.713        | BB   | 1.0869      | 281.02573   | 3.04089      | 0.4370  |

#### 4al

Prepared according to the procedure within 94 h as White solid (107.1 mg, 90% yield, dr > 20:1). mp 145.4 – 145.9 °C;  $[\alpha]_D^{21} = -380.61$  (c 0.89, CH<sub>2</sub>Cl<sub>2</sub>); <sup>1</sup>H NMR (400 MHz, CDCl<sub>3</sub>) δ 8.66 – 8.57 (m, 2H), 8.07 – 7.97 (m, 3H), 7.62 – 7.55 (m, 2H), 7.54 – 7.46 (m, 3H), 7.44 – 7.37 (m, 2H), 7.31 (td, *J* = 7.7, 1.0 Hz, 1H), 7.22 – 7.14 (m, 3H),

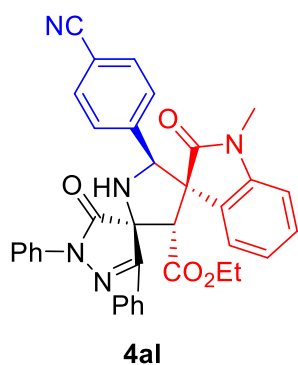

7.10 – 7.04 (m, 1H), 6.71 (d,  $J = 7.7$  Hz, 1H), 5.93 (d,  $J = 3.8$  Hz, 1H), 4.65 (s, 1H), 3.71 – 3.43 (m, 2H), 2.84 (d,  $J = 4.0$  Hz, 1H), 2.81 (s, 3H), 0.46 (t,  $J = 7.1$  Hz, 3H);  $^{13}\text{C}$  NMR (101 MHz,  $\text{CDCl}_3$ )  $\delta$  176.92, 175.03, 167.24, 154.81, 143.73, 142.33, 137.90, 131.79, 130.86, 129.36, 129.12, 129.05, 129.02, 128.92, 127.53, 127.43, 125.63, 125.47, 123.70, 119.22, 118.72, 111.91, 107.73, 70.90, 68.34, 61.01, 60.16, 58.60, 26.15, 13.13; HRMS (ESI)  $m/z$  Calcd. for  $\text{C}_{36}\text{H}_{30}\text{N}_5\text{O}_4^+$  ( $[\text{M}+\text{H}]^+$ ) 596.2292, Found 596.2285; Enantiomeric excess was determined to be 99% (determined

by HPLC using chiral AD-H column, hexane/2-propanol = 70/30,  $\lambda = 254$  nm, 30 °C, 0.8 mL/min,  $t_{\text{major}} = 14.9$  min,  $t_{\text{minor}} = 20.6$  min).

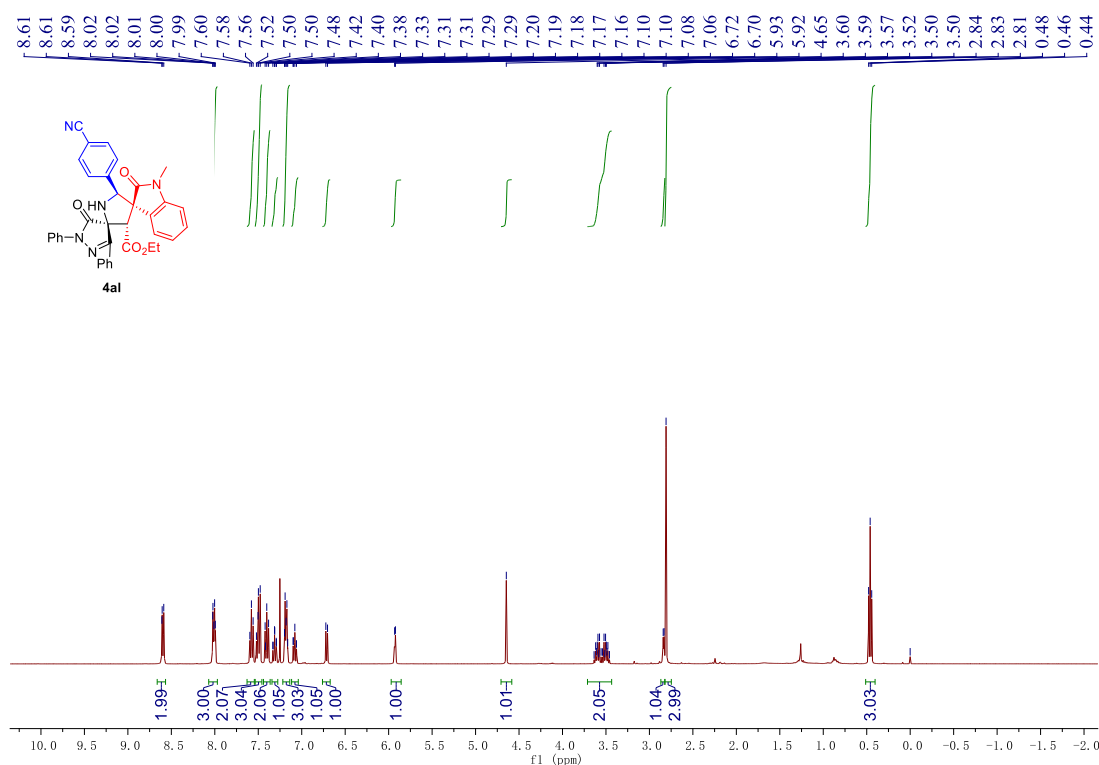

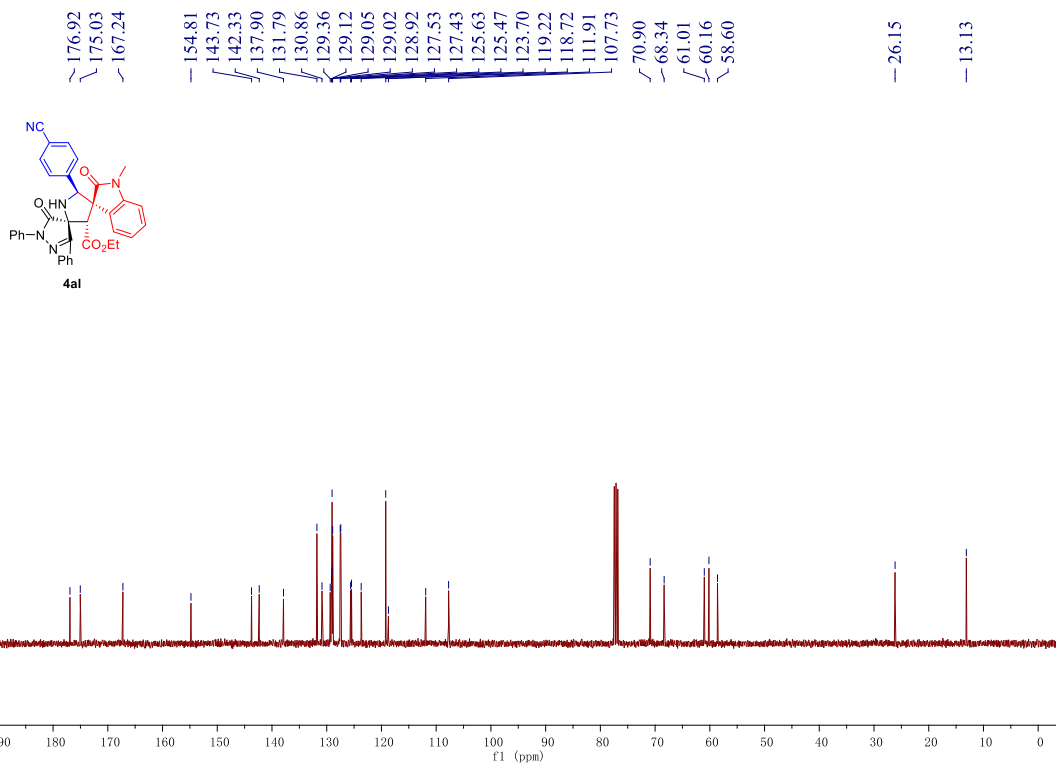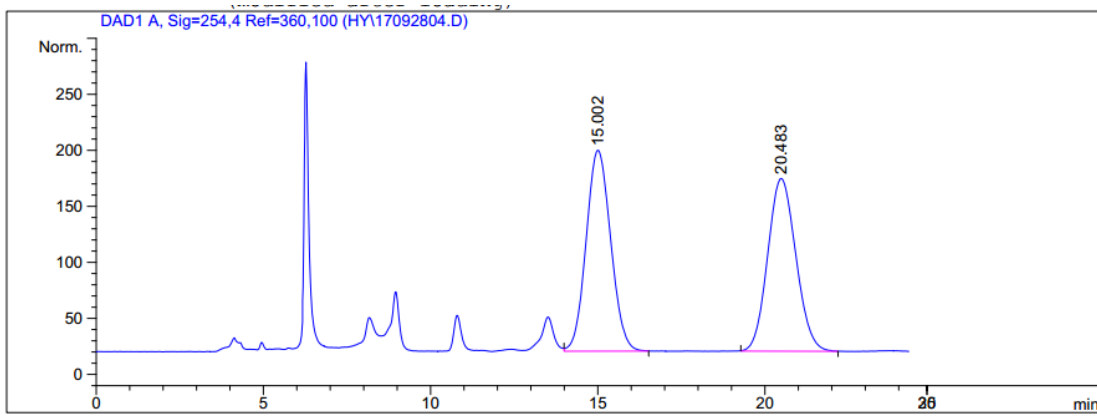

| Peak # | RetTime [min] | Type | Width [min] | Area [mAU*s] | Height [mAU] | Area %  |
|--------|---------------|------|-------------|--------------|--------------|---------|
| 1      | 15.002        | VB   | 0.7993      | 9156.83984   | 179.46423    | 50.3280 |
| 2      | 20.483        | BB   | 0.9240      | 9037.46973   | 154.14279    | 49.6720 |

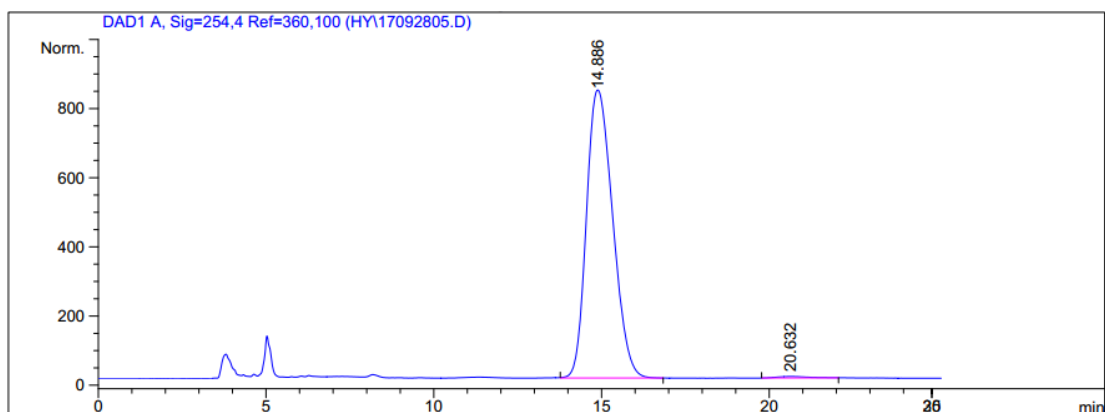

| Peak # | RetTime [min] | Type | Width [min] | Area [mAU*s] | Height [mAU] | Area %  |
|--------|---------------|------|-------------|--------------|--------------|---------|
| 1      | 14.886        | BB   | 0.8574      | 4.52224e4    | 832.99689    | 99.3262 |
| 2      | 20.632        | BB   | 0.8470      | 306.78772    | 4.41326      | 0.6738  |

#### 4am

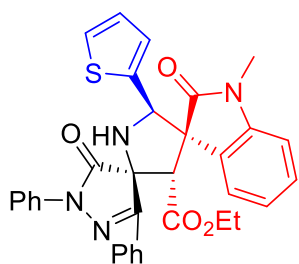

**4am**

Prepared according to the procedure within 84 h as White solid (109.4 mg, 95% yield, dr > 20:1). mp 145.3 – 146.9 °C;  $[\alpha]_D^{20} = -289.30$  (*c* 0.94, CH<sub>2</sub>Cl<sub>2</sub>); <sup>1</sup>H NMR (400 MHz, CDCl<sub>3</sub>) δ 8.63 (d, *J* = 7.4 Hz, 2H), 8.02 – 8.10 (m, 3H), 7.60 – 7.54 (m, 2H), 7.53 – 7.42 (m, 3H), 7.27 – 7.33 (m, 1H), 7.19 – 7.24 (m, 1H), 7.11 – 7.17 (m, 2H), 6.85 (dd, *J* = 4.9, 3.6 Hz, 1H), 6.66 – 6.76 (m, 2H), 6.15 (d, *J* = 3.7 Hz, 1H), 4.71 (s, 1H), 3.71 – 3.43 (m, 2H), 2.92 (s, 3H), 2.88 (d, *J* = 4.1 Hz, 1H), 0.48 (t, *J* = 7.1 Hz, 3H); <sup>13</sup>C NMR (101 MHz, CDCl<sub>3</sub>) δ 177.22, 174.94, 167.49, 154.94, 144.04, 140.00, 138.09, 130.79, 129.47, 129.34, 129.00, 128.88, 128.78, 127.66, 126.50, 125.67, 125.38, 125.06, 124.45, 123.48, 119.28, 107.52, 70.69, 65.90, 60.90, 60.20, 58.45, 26.26, 13.15; HRMS (ESI) *m/z* Calcd. for C<sub>33</sub>H<sub>29</sub>N<sub>4</sub>O<sub>4</sub>S<sup>+</sup> ([M+H]<sup>+</sup>) 577.1904, Found 577.1902; Enantiomeric excess was determined to be 96% (determined by HPLC using chiral AD-H column, hexane/2-propanol = 70/30, λ = 254 nm, 30 °C, 0.8 mL/min, *t*<sub>major</sub> = 12.6 min, *t*<sub>minor</sub> = 32.9 min).

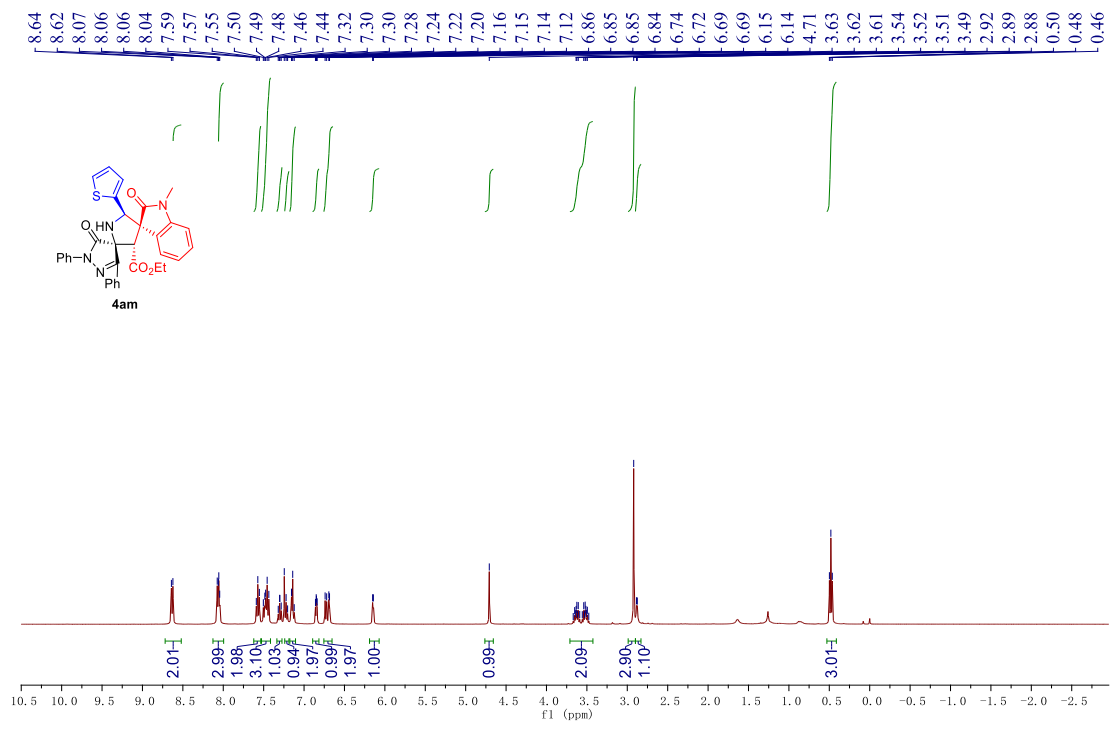

- 177.22
- 174.94
- 167.49
- 154.94
- 129.00
- 128.88
- 128.78
- 127.66
- 126.50
- 125.67
- 125.38
- 125.06
- 124.45
- 107.38
- 70.69
- 65.90
- 60.90
- 60.20
- 58.45
- 26.26
- 13.15

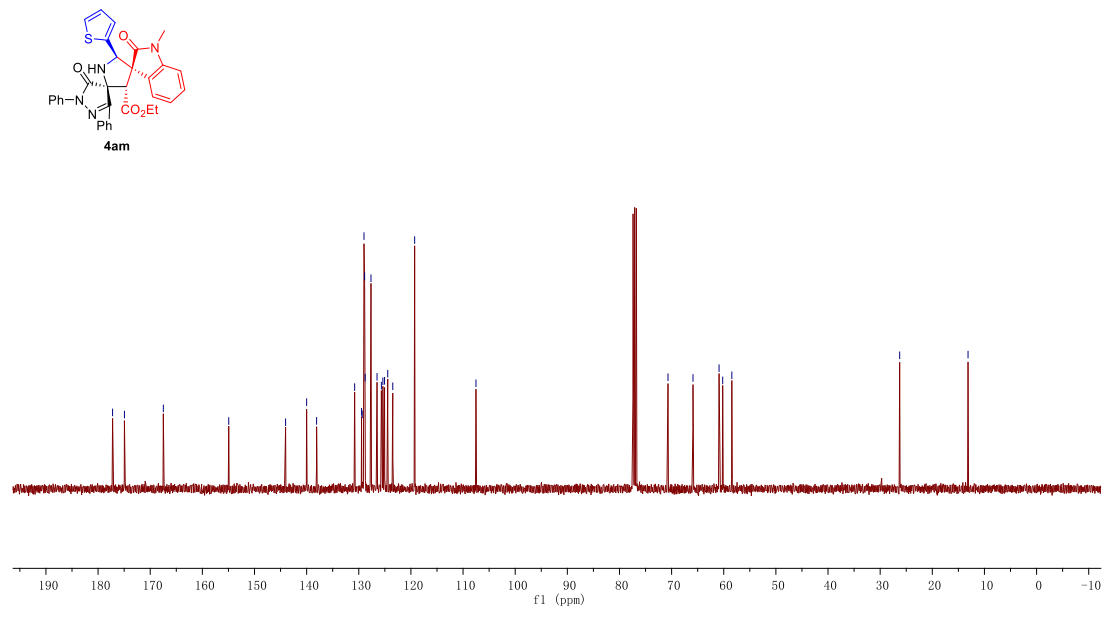

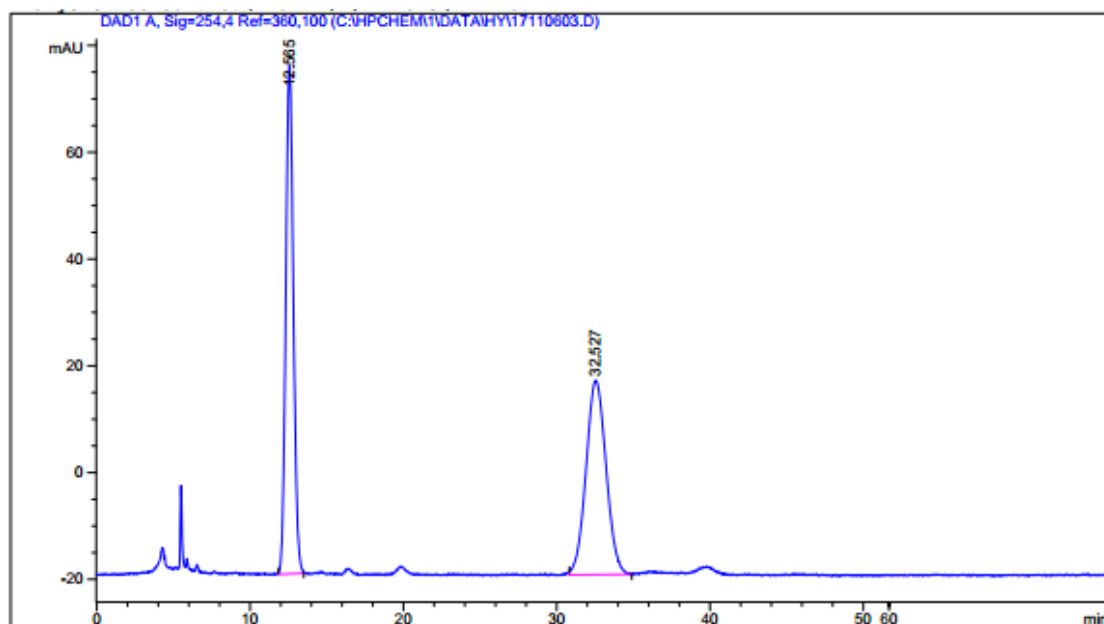

| Peak # | RetTime [min] | Type | Width [min] | Area [mAU*s] | Height [mAU] | Area %  |
|--------|---------------|------|-------------|--------------|--------------|---------|
| 1      | 12.565        | BB   | 0.5222      | 3269.94019   | 95.32548     | 49.7426 |
| 2      | 32.527        | BP   | 1.0768      | 3303.77979   | 36.40379     | 50.2574 |

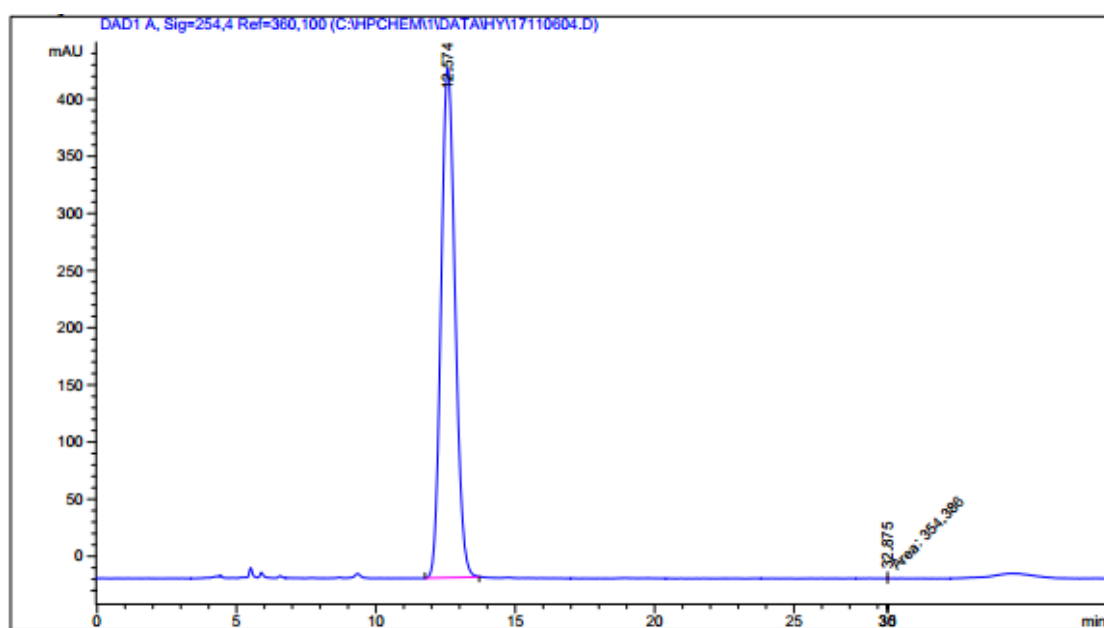

| Peak # | RetTime [min] | Type | Width [min] | Area [mAU*s] | Height [mAU] | Area %  |
|--------|---------------|------|-------------|--------------|--------------|---------|
| 1      | 12.574        | PB   | 0.5411      | 1.55627e4    | 446.01660    | 97.7735 |
| 2      | 32.875        | MM   | 1.4676      | 354.38586    | 4.02450      | 2.2265  |



**4an**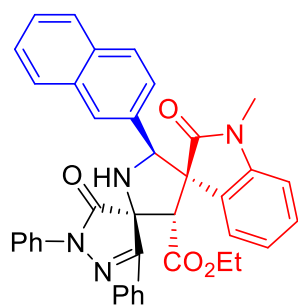**4an**

Prepared according to the procedure within 72 h as White solid (119.1 mg, 96% yield, dr > 20:1). mp 126.0 – 126.9 °C;  $[\alpha]_D^{19} = -364.95$  ( $c$  0.43,  $\text{CH}_2\text{Cl}_2$ );  $^1\text{H NMR}$  (400 MHz,  $\text{CDCl}_3$ )  $\delta$  8.84 – 8.68 (m, 2H), 8.26 – 8.06 (m, 3H), 7.60 – 7.80 (m, 5H), 7.58 – 7.45 (m, 4H), 7.44 – 7.38 (m, 2H), 7.29 – 7.36 (m, 1H), 7.17 – 7.28 (m, 3H), 6.66 (d,  $J = 7.6$  Hz, 1H), 6.11 (s, 1H), 4.77 (s, 1H), 3.77 – 3.46 (m, 2H), 2.67 – 2.82 (m, 3H), 0.50 (t,  $J = 7.1$  Hz, 3H);  $^{13}\text{C NMR}$  (101 MHz,  $\text{CDCl}_3$ )  $\delta$  177.43, 175.13, 167.68, 155.15, 143.96, 138.16, 134.04, 133.28, 132.84, 130.77, 129.77, 129.60, 129.00, 128.93, 128.74, 128.26, 127.68, 127.55, 127.50, 125.91, 125.84, 125.72, 125.36, 124.65, 123.49, 119.33, 107.47, 70.92, 69.29, 60.89, 60.37, 58.69, 26.09, 13.16; HRMS (ESI)  $m/z$  Calcd. for  $\text{C}_{39}\text{H}_{33}\text{N}_4\text{O}_4^+$  ( $[\text{M}+\text{H}]^+$ ) 621.2496, Found 621.2494; Enantiomeric excess was determined to be 94% (determined by HPLC using chiral AD-H column, hexane/2-propanol = 70/30,  $\lambda = 254$  nm, 30 °C, 0.8 mL/min,  $t_{\text{major}} = 12.1$  min,  $t_{\text{minor}} = 30.6$  min).

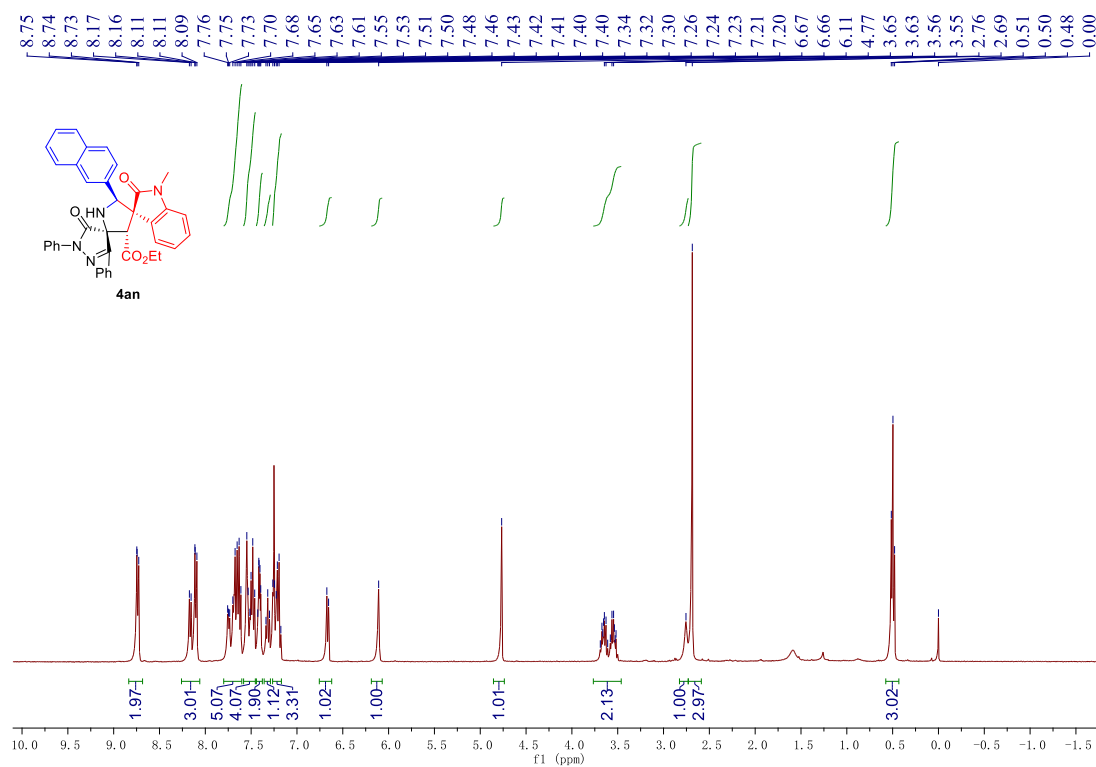

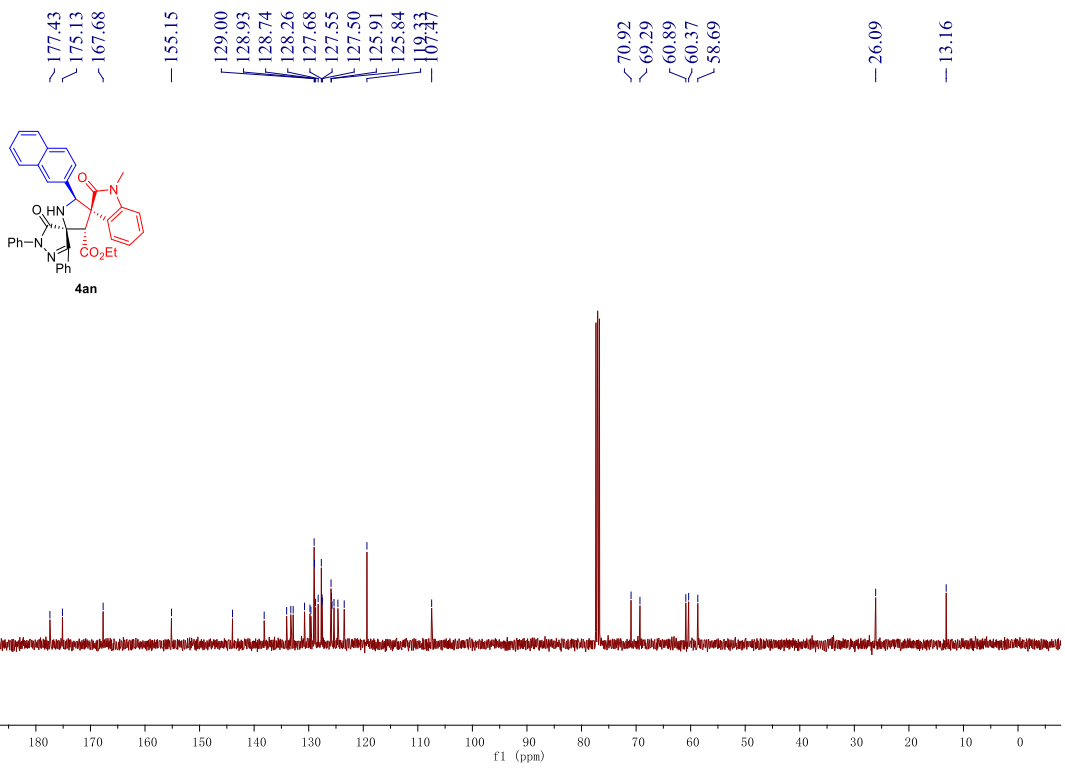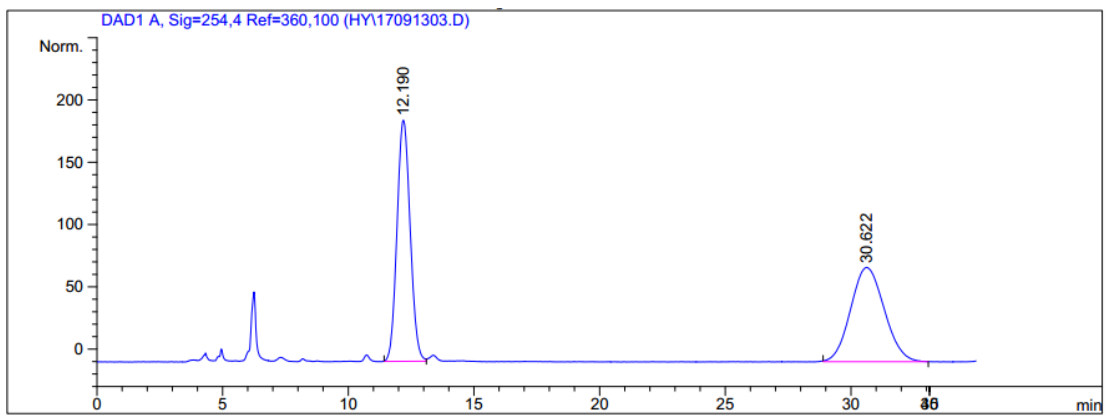

| Peak # | RetTime [min] | Type | Width [min] | Area [mAU*s] | Height [mAU] | Area %  |
|--------|---------------|------|-------------|--------------|--------------|---------|
| 1      | 12.190        | BV   | 0.5673      | 7024.87256   | 193.59529    | 49.9189 |
| 2      | 30.622        | BB   | 1.3742      | 7047.68555   | 75.70037     | 50.0811 |

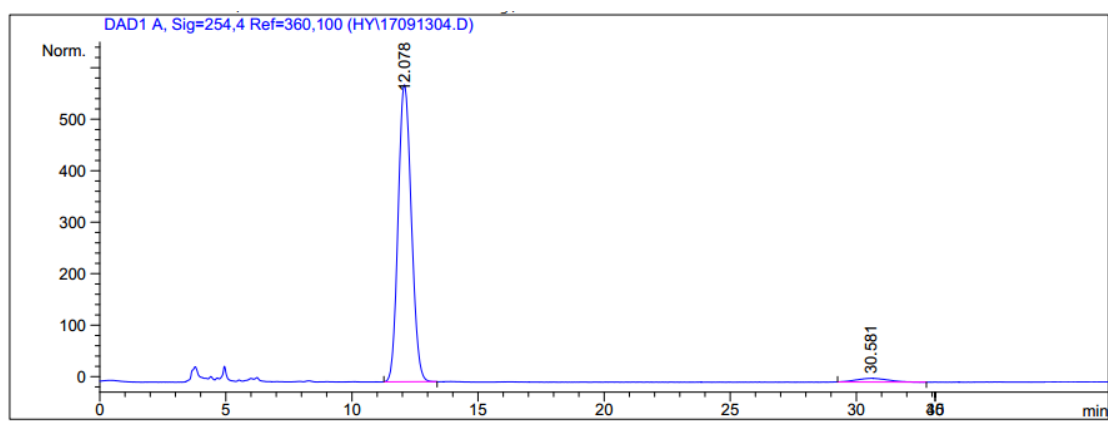

| Peak # | RetTime [min] | Type | Width [min] | Area [mAU*s] | Height [mAU] | Area %  |
|--------|---------------|------|-------------|--------------|--------------|---------|
| 1      | 12.078        | BP   | 0.5721      | 2.09724e4    | 576.92859    | 97.0048 |
| 2      | 30.581        | BP   | 1.0708      | 647.56854    | 7.32914      | 2.9952  |

#### 4ao

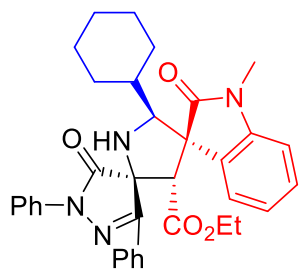

**4ao**

Prepared according to the procedure within 96 h as White solid (80.7 mg, 70% yield, dr > 20:1). mp 105.6 – 105.2 °C;  $[\alpha]_D^{20} = -128.36$  (*c* 0.40, CH<sub>2</sub>Cl<sub>2</sub>); <sup>1</sup>H NMR (400 MHz, CDCl<sub>3</sub>) δ 7.83 (d, *J* = 8.1 Hz, 2H), 7.43 – 7.35 (m, 4H), 7.23 – 7.12 (m, 2H), 7.08 – 7.02 (m, 3H), 6.88 (dd, *J* = 7.8 Hz, 1H), 6.50 (d, *J* = 7.8 Hz, 1H), 6.39 (dd, *J* = 7.6 Hz, 1H), 4.27 (d, *J* = 9.0 Hz, 1H), 4.04 (t, *J* = 9.1 Hz, 1H), 3.71 – 3.53 (m, 2H), 3.11 (s, 3H), 2.40 – 2.28 (m, 1H), 2.03 (d, *J* = 11.4 Hz, 1H), 1.82 – 1.62 (m, 4H), 1.37 – 1.11 (m, 6H), 0.63 (t, *J* = 7.1 Hz, 3H); <sup>13</sup>C NMR (101 MHz, CDCl<sub>3</sub>) δ 175.33, 172.30, 169.26, 157.88, 142.79, 137.34, 133.24, 129.04, 129.02, 128.81, 128.10, 127.58, 127.47, 125.48, 123.81, 121.89, 119.85, 106.97, 64.49, 63.69, 60.26, 52.09, 43.95, 32.03, 30.13, 26.69, 26.27, 25.97, 25.93, 13.54; HRMS (ESI) *m/z* Calcd. for C<sub>35</sub>H<sub>37</sub>N<sub>4</sub>O<sub>4</sub><sup>+</sup> ([M+H]<sup>+</sup>) 577.2809, Found 577.2811; Enantiomeric excess was determined to be 33% (determined by HPLC using chiral AD-H column, hexane/2-propanol = 70/30, λ = 254 nm, 30 °C, 0.8 mL/min, *t*<sub>major</sub> = 22.8 min, *t*<sub>minor</sub> = 8.7 min).

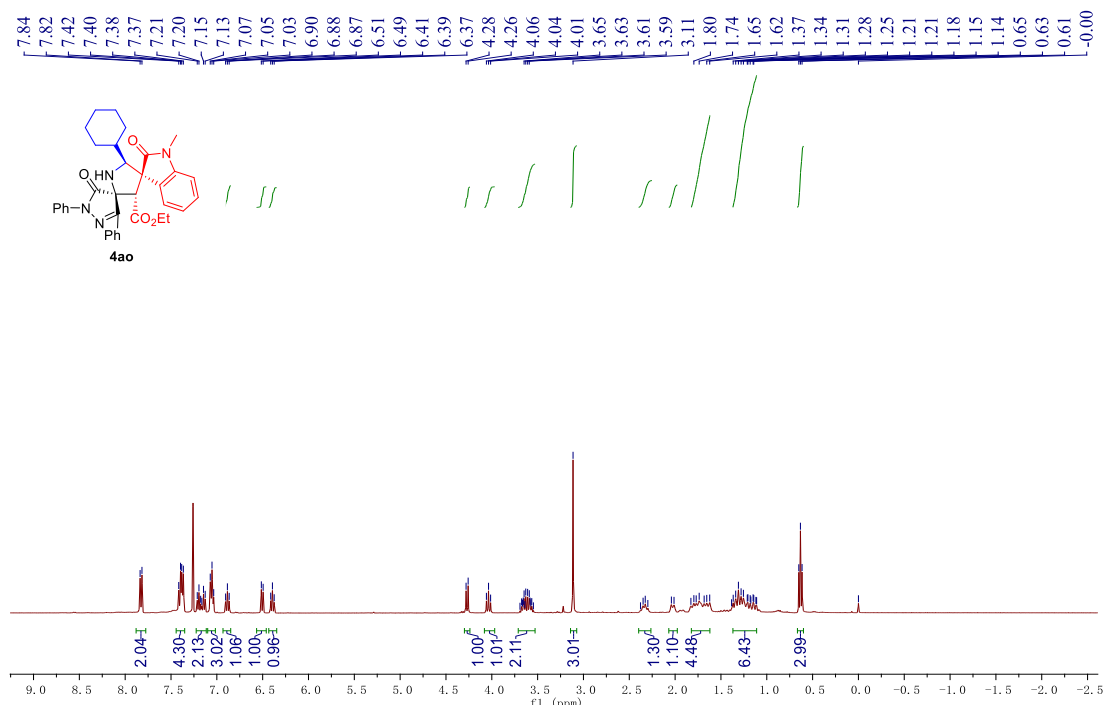

175.33  
 172.30  
 169.26  
 157.88  
 142.79  
 129.04  
 129.02  
 128.81  
 128.10  
 127.58  
 127.47  
 125.48  
 123.81  
 121.89  
 118.87  
 64.49  
 63.69  
 60.26  
 52.09  
 43.95  
 32.03  
 30.13  
 26.69  
 26.27  
 25.97  
 25.93  
 13.54

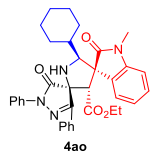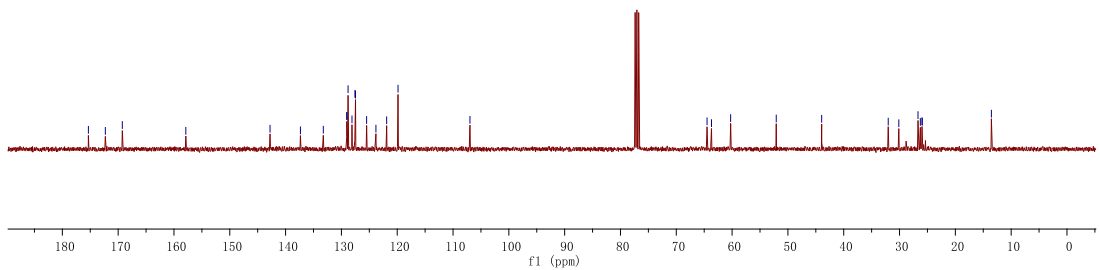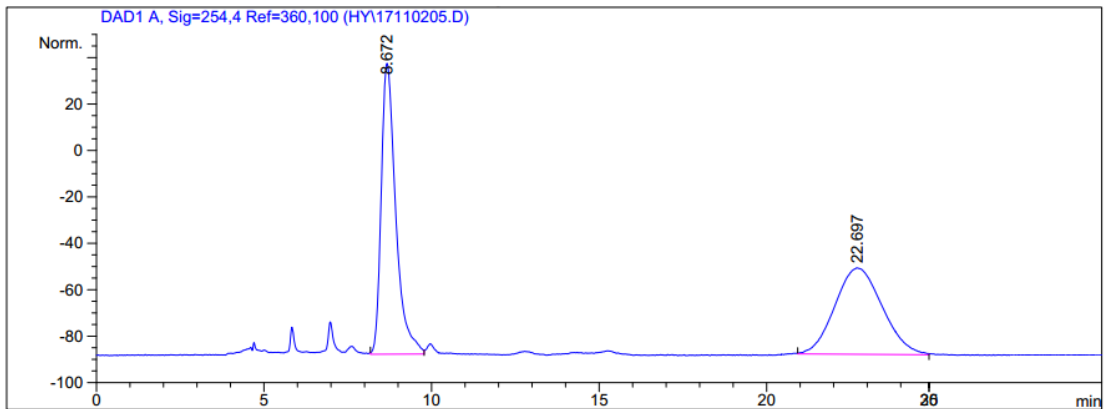

| Peak # | RetTime [min] | Type | Width [min] | Area [mAU*s] | Height [mAU] | Area %  |
|--------|---------------|------|-------------|--------------|--------------|---------|
| 1      | 8.672         | BV   | 0.4555      | 3776.38086   | 125.35869    | 50.8044 |
| 2      | 22.697        | BB   | 1.1783      | 3656.80151   | 37.21746     | 49.1956 |

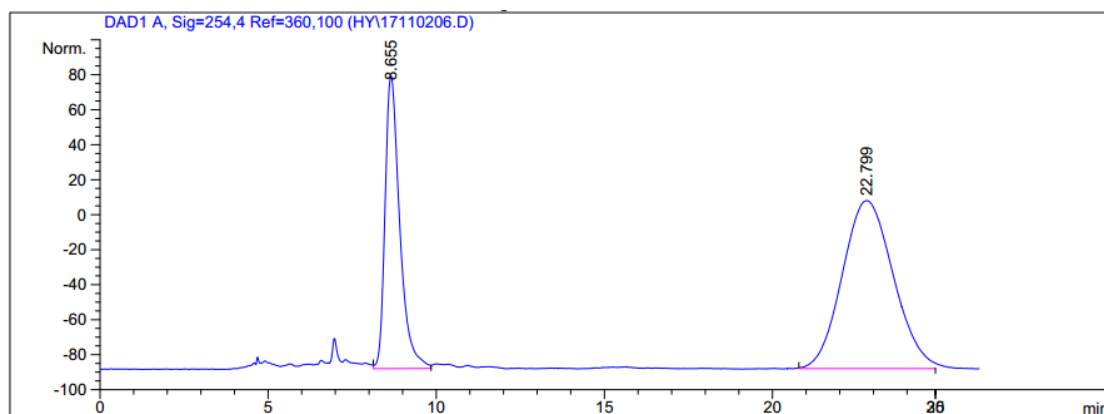

| Peak # | RetTime [min] | Type | Width [min] | Area [mAU*s] | Height [mAU] | Area %  |
|--------|---------------|------|-------------|--------------|--------------|---------|
| 1      | 8.655         | BV   | 0.4618      | 5079.09961   | 167.46519    | 33.3441 |
| 2      | 22.799        | BB   | 1.5288      | 1.01533e4    | 96.08777     | 66.6559 |

#### 4ba

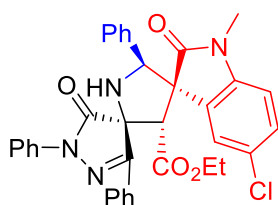

#### 4ba

Prepared according to the procedure within 84 h as White solid (114.7 mg, 95% yield, dr > 20:1). mp 138.9 – 139.5 °C;  $[\alpha]_D^{19} = -276.16$  (*c* 0.58, CH<sub>2</sub>Cl<sub>2</sub>); <sup>1</sup>H NMR (400 MHz, CDCl<sub>3</sub>) δ 8.66 (d, *J* = 7.4 Hz, 2H), 8.08 – 8.18 (m, 3H), 7.63 – 7.45 (m, 5H), 7.33 – 7.19 (m, 5H), 7.06 – 7.13 (m, 2H), 6.62 (d, *J* = 8.3 Hz, 1H), 5.89 (d, *J* = 3.8 Hz, 1H), 4.70 (s, 1H), 3.53 – 3.64 (m, 2H), 2.76 (s, 3H), 2.62 (d, *J* = 3.9 Hz, 1H), 0.58 (t, *J* = 7.1 Hz, 3H); <sup>13</sup>C NMR (101 MHz, CDCl<sub>3</sub>) δ 177.01, 174.80, 167.35, 154.97, 142.46, 138.09, 135.97, 131.46, 130.79, 129.53, 129.03, 128.93, 128.76, 128.71, 128.39, 128.00, 127.59, 126.73, 126.10, 125.41, 119.21, 108.41, 70.80, 69.15, 61.10, 60.46, 58.05, 26.13, 13.31; HRMS (ESI) *m/z* Calcd. for C<sub>35</sub>H<sub>30</sub>ClN<sub>4</sub>O<sub>4</sub><sup>+</sup> ([M+H]<sup>+</sup>) 605.1950, Found 605.1953; Enantiomeric excess was determined to be 92% (determined by HPLC using chiral AD-H column, hexane/2-propanol = 70/30, λ = 254 nm, 30 °C, 0.8 mL/min, *t*<sub>major</sub> = 7.0 min, *t*<sub>minor</sub> = 14.9 min).

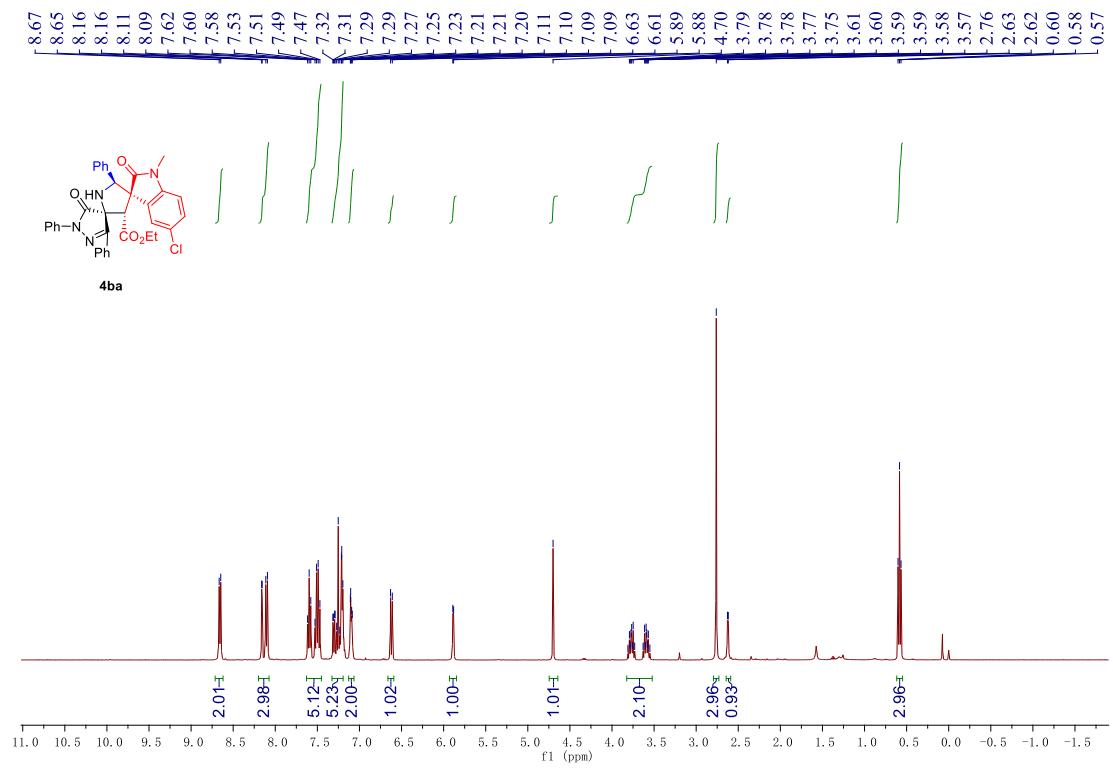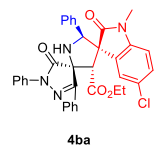

- ~ 177.01
- ~ 174.80
- ~ 167.35
- 154.97
- 130.79
- 129.03
- 128.93
- 5.23H
- 128.71
- 128.00
- 127.59
- 126.73
- 126.10
- 125.41
- 119.21
- 108.21
- 70.80
- 69.15
- 61.10
- 60.46
- 58.05
- 26.13
- 13.31

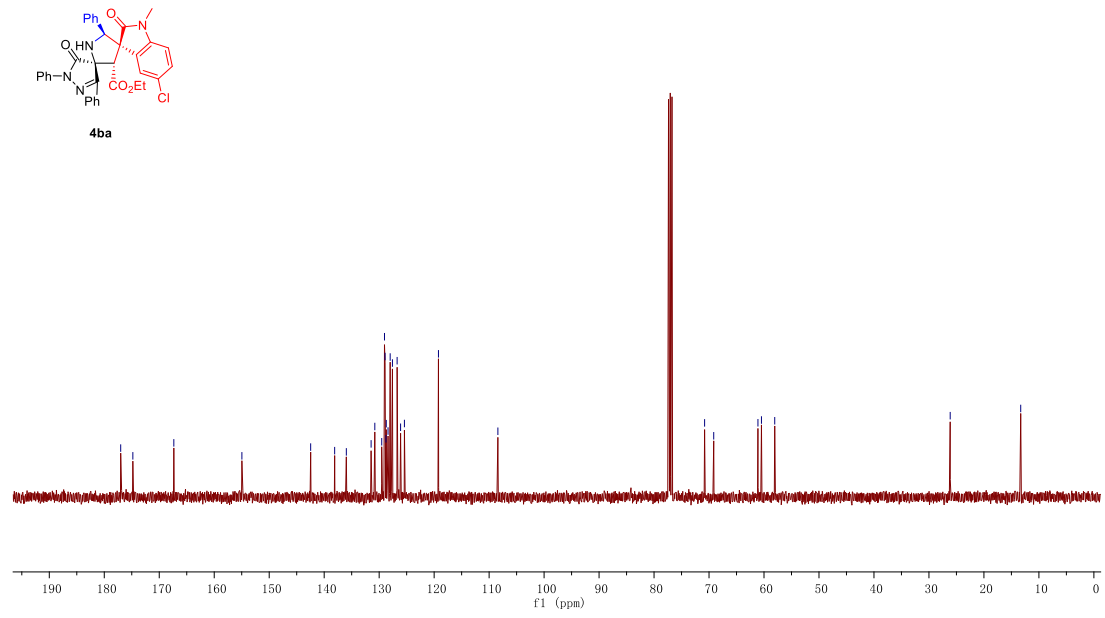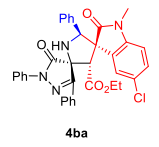

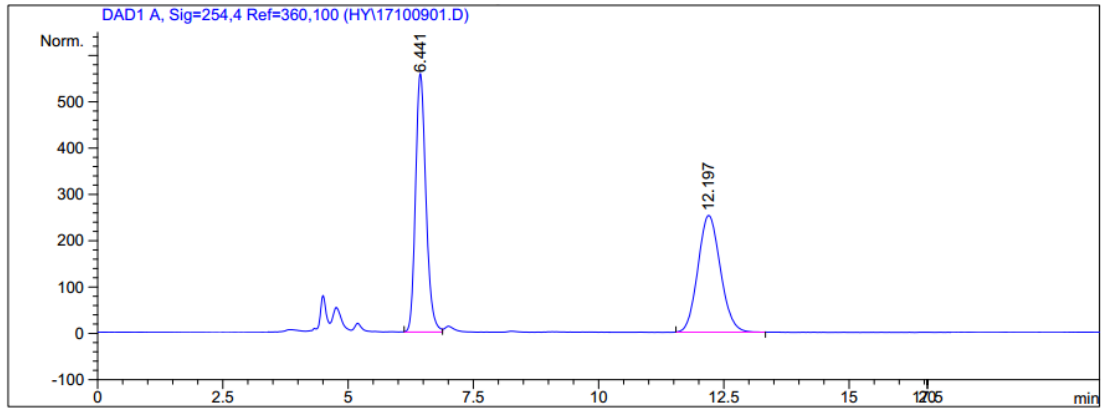

| Peak # | RetTime [min] | Type | Width [min] | Area [mAU*s] | Height [mAU] | Area %  |
|--------|---------------|------|-------------|--------------|--------------|---------|
| 1      | 6.441         | BV   | 0.2240      | 8040.66992   | 558.33801    | 50.5012 |
| 2      | 12.197        | BB   | 0.4883      | 7881.06104   | 252.38983    | 49.4988 |

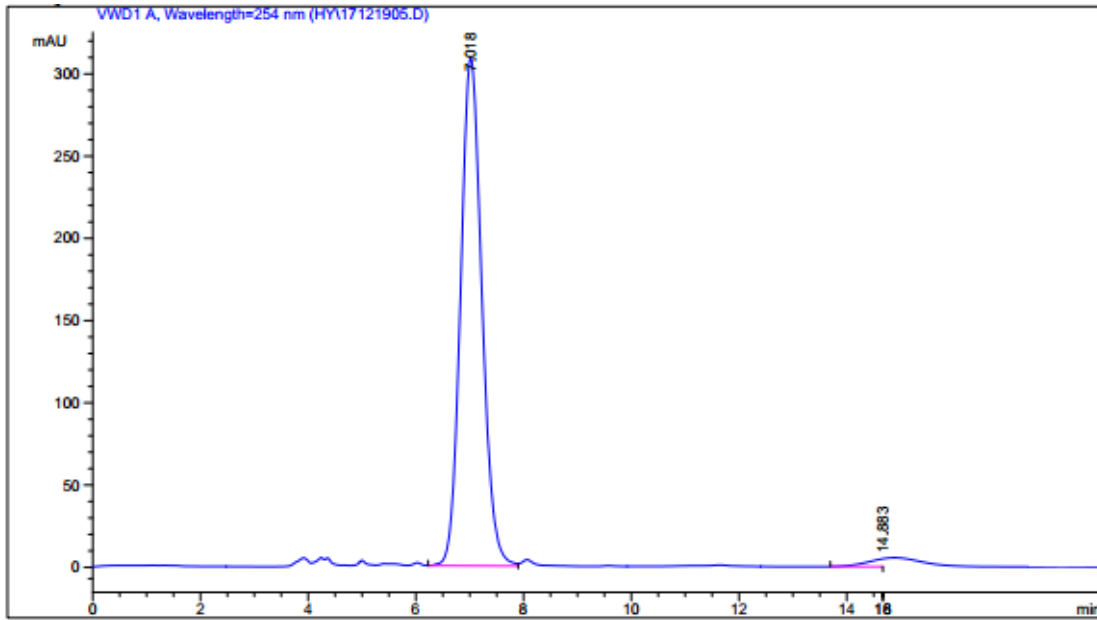

| Peak # | RetTime [min] | Type | Width [min] | Area mAU*s | Height [mAU] | Area %  |
|--------|---------------|------|-------------|------------|--------------|---------|
| 1      | 7.018         | VV   | 0.4228      | 8459.22949 | 308.94608    | 95.8527 |
| 2      | 14.883        | BB   | 0.9571      | 366.00558  | 5.40769      | 4.1473  |

**4ca**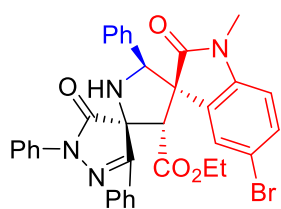**4ca**

Prepared according to the procedure within 84 h as White solid (103.7 mg, 80% yield, dr > 20:1). mp 134.0 – 134.6 °C;  $[\alpha]_D^{18} = 254.18$  (*c* 0.69, CH<sub>2</sub>Cl<sub>2</sub>); <sup>1</sup>H NMR (400 MHz, CDCl<sub>3</sub>) δ 8.65 (d, *J* = 7.4 Hz, 2H), 8.27 (d, *J* = 1.9 Hz, 1H), 8.11 (d, *J* = 7.8 Hz, 2H), 7.65 – 7.55 (m, 2H), 7.54 – 7.43 (m, 4H), 7.28 – 7.19 (m, 4H), 7.13 – 7.06 (m, 2H), 6.57 (d, *J* = 8.2 Hz, 1H), 5.88 (d, *J* = 4.0 Hz, 1H), 4.69 (s, 1H), 3.84 – 3.53 (m, 2H), 2.75 (s, 3H), 2.61 (d, *J* = 4.1 Hz, 1H), 0.59 (t, *J* = 7.1 Hz, 3H); <sup>13</sup>C NMR (101 MHz, CDCl<sub>3</sub>) δ 176.91, 174.77, 167.34, 154.94, 142.93, 138.11, 135.96, 131.81, 131.66, 130.79, 129.54, 129.04, 128.93, 128.78, 128.39, 128.00, 127.58, 126.74, 125.40, 119.19, 116.05, 108.93, 70.79, 69.12, 61.13, 60.41, 58.04, 26.11, 13.33; HRMS (ESI) *m/z* Calcd. for C<sub>35</sub>H<sub>30</sub>BrN<sub>4</sub>O<sub>4</sub><sup>+</sup> ([M+H]<sup>+</sup>) 649.1445, Found 649.1444; Enantiomeric excess was determined to be 83% (determined by HPLC using chiral AD-H column, hexane/2-propanol = 70/30, λ = 254 nm, 30 °C, 0.8 mL/min, *t*<sub>major</sub> = 6.3 min, *t*<sub>minor</sub> = 12.4 min).

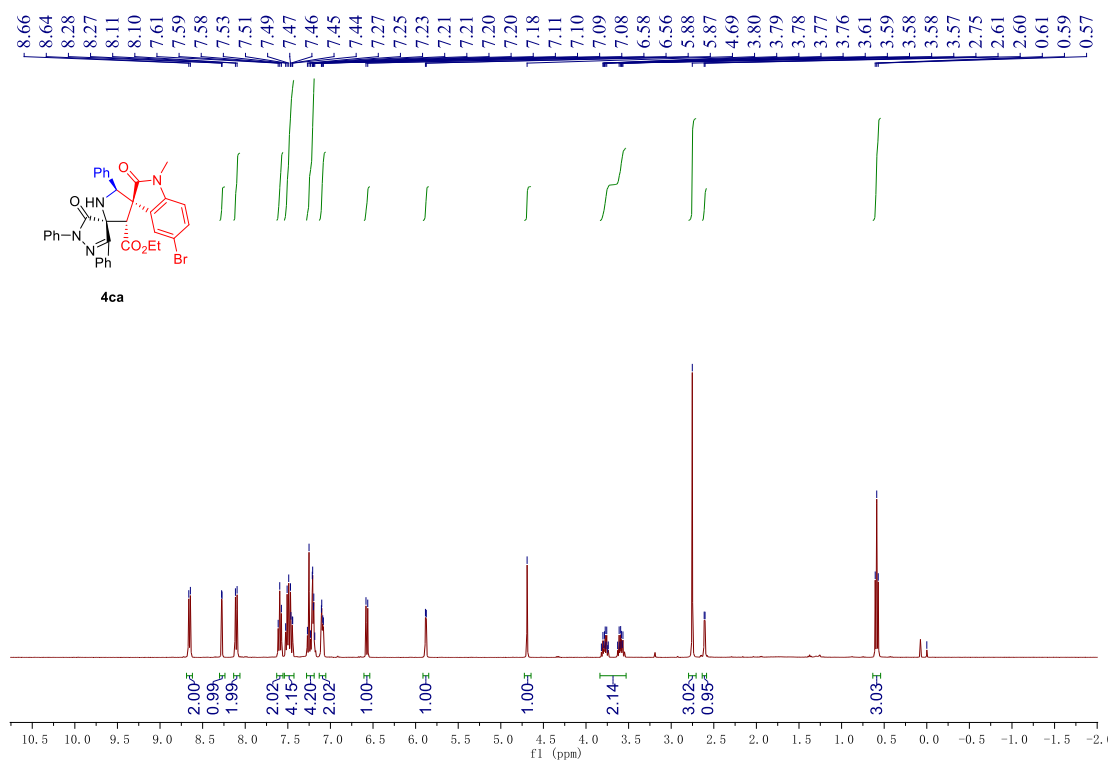



176.91  
 174.77  
 167.34  
 154.94  
 142.93  
 138.11  
 135.96  
 131.81  
 131.66  
 130.79  
 129.54  
 129.04  
 128.93  
 128.78  
 128.39  
 128.00  
 127.58  
 126.74  
 125.40  
 119.19  
 116.05  
 108.93  
 70.79  
 69.12  
 61.13  
 60.41  
 58.04  
 26.11  
 13.33

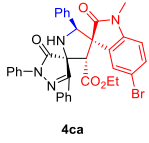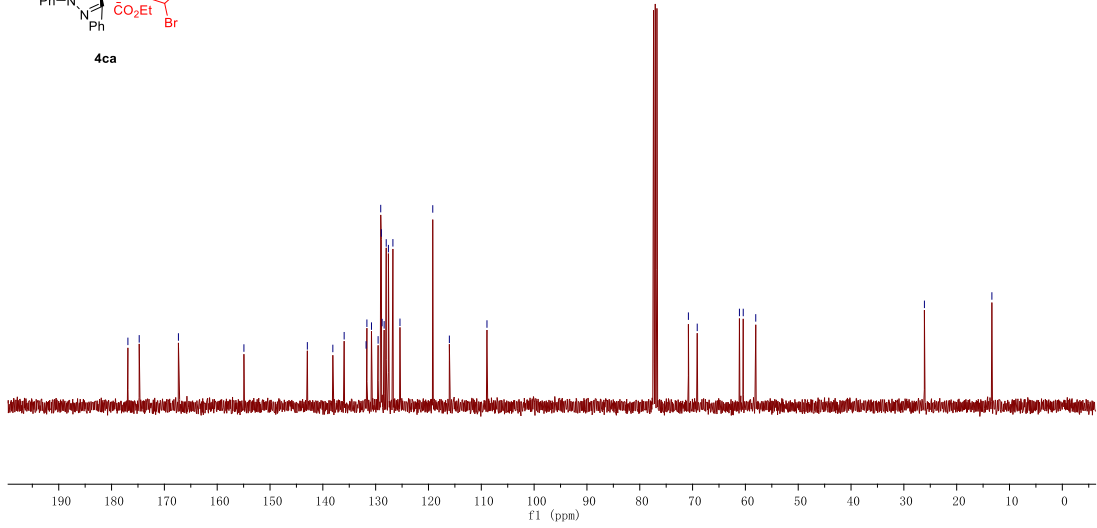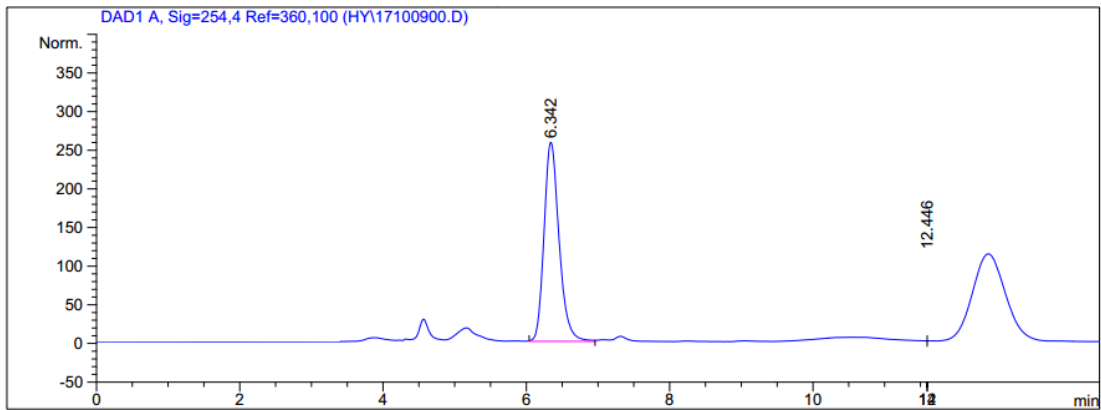

| Peak # | RetTime [min] | Type | Width [min] | Area [mAU*s] | Height [mAU] | Area %  |
|--------|---------------|------|-------------|--------------|--------------|---------|
| 1      | 6.342         | BV   | 0.2261      | 3754.68188   | 257.46786    | 50.6777 |
| 2      | 12.446        | VB   | 0.5039      | 3654.26245   | 113.42494    | 49.3223 |

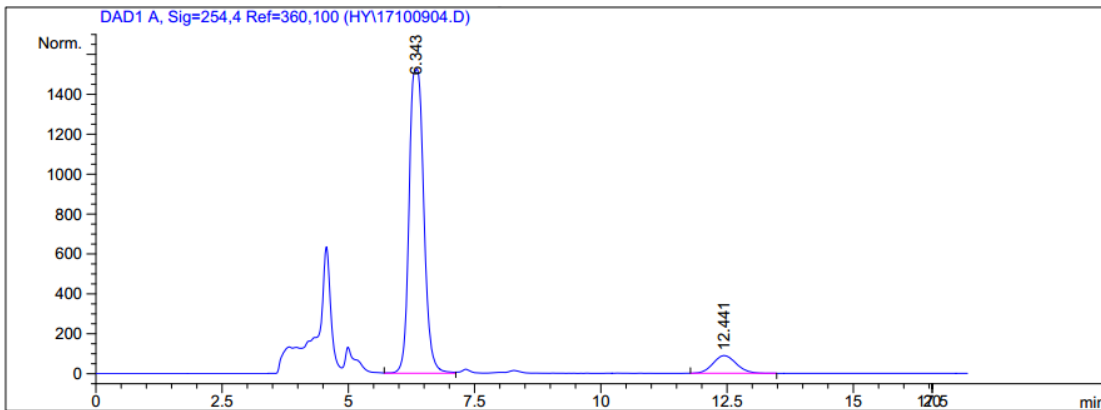

| Peak # | RetTime [min] | Type | Width [min] | Area [mAU*s] | Height [mAU] | Area %  |
|--------|---------------|------|-------------|--------------|--------------|---------|
| 1      | 6.343         | VV   | 0.3153      | 3.07090e4    | 1522.47791   | 91.4570 |
| 2      | 12.441        | BB   | 0.5036      | 2868.52686   | 89.10049     | 8.5430  |

#### 4da

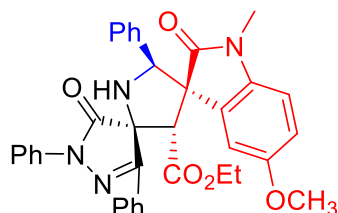

4da

Prepared according to the procedure within 96 h as White solid (97.2 mg, 81% yield, dr > 20:1). mp 129.3 – 130.7 °C;  $[\alpha]_D^{15} = -289.96$  (*c* 0.76, CH<sub>2</sub>Cl<sub>2</sub>); <sup>1</sup>H NMR (400 MHz, CDCl<sub>3</sub>) δ 8.70 – 8.63 (d, *J* = 7.5 Hz, 2H), 8.15 – 8.07 (d, *J* = 7.8 Hz, 2H), 7.86 (d, *J* = 2.5 Hz, 1H), 7.62 – 7.55 (m, 2H), 7.53 – 7.43 (m, 3H), 7.24 – 7.14 (m, 4H), 7.13 – 7.05 (m, 2H), 6.84 (dd, *J* = 8.4, 2.5 Hz, 1H), 6.59 (d, *J* = 8.4 Hz, 1H), 5.88 (d, *J* = 4.1 Hz, 1H), 4.71 (s, 1H), 3.87 (s, 3H), 3.75 – 3.49 (m, 2H), 2.75 (s, 3H), 2.55 (d, *J* = 4.1 Hz, 1H), 0.54 (t, *J* = 7.1 Hz, 3H); <sup>13</sup>C NMR (101 MHz, CDCl<sub>3</sub>) δ 177.12, 175.03, 167.63, 156.67, 155.06, 138.26, 137.44, 136.47, 131.00, 130.72, 129.58, 128.95, 128.90, 128.14, 127.90, 127.62, 126.70, 125.23, 119.14, 113.50, 112.55, 107.86, 70.84, 69.32, 60.87, 60.79, 58.38, 55.99, 26.11, 13.27; HRMS (ESI) *m/z* Calcd. for C<sub>36</sub>H<sub>33</sub>N<sub>4</sub>O<sub>5</sub><sup>+</sup> ([M+H]<sup>+</sup>) 601.2445, Found 601.2439; Enantiomeric excess was determined to be 95% (determined by HPLC using chiral AD-H column, hexane/2-propanol = 70/30, λ = 254 nm, 30 °C, 0.8 mL/min, *t*<sub>major</sub> = 8.1 min, *t*<sub>minor</sub> = 12.3 min).

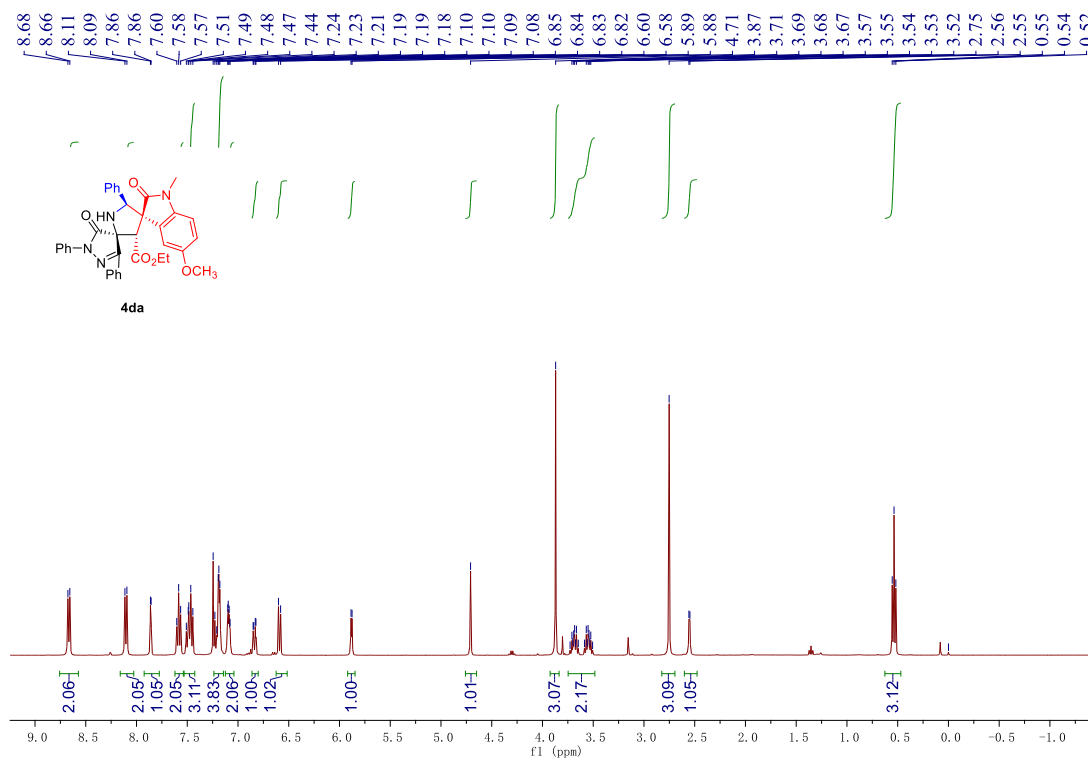

177.12  
175.03  
167.63  
156.67  
155.06  
138.26  
137.44  
136.47  
131.00  
130.72  
129.58  
128.95  
128.90  
128.14  
127.90  
127.62  
126.70  
125.23  
119.14  
113.50  
112.55  
107.86  
70.84  
69.32  
60.87  
60.79  
58.38  
55.99  
26.11  
13.27

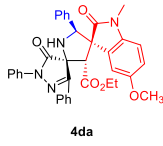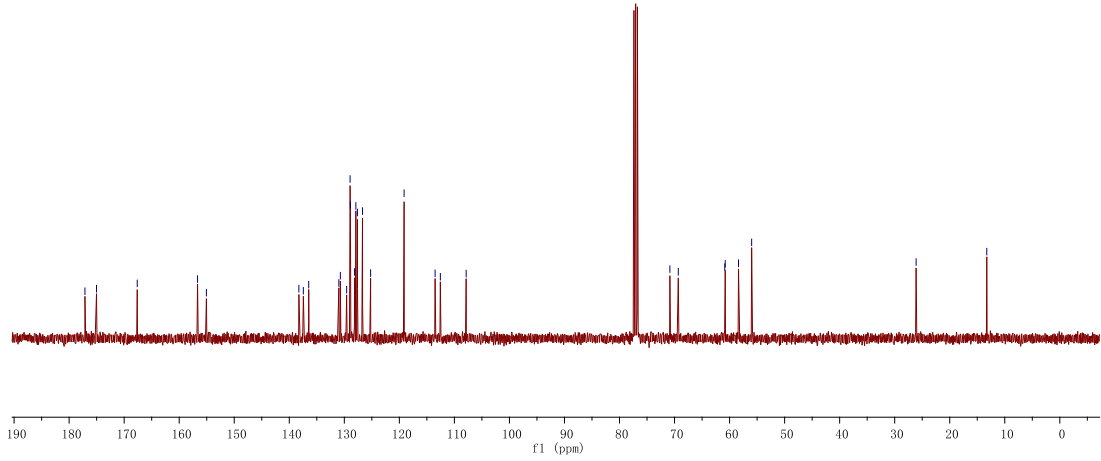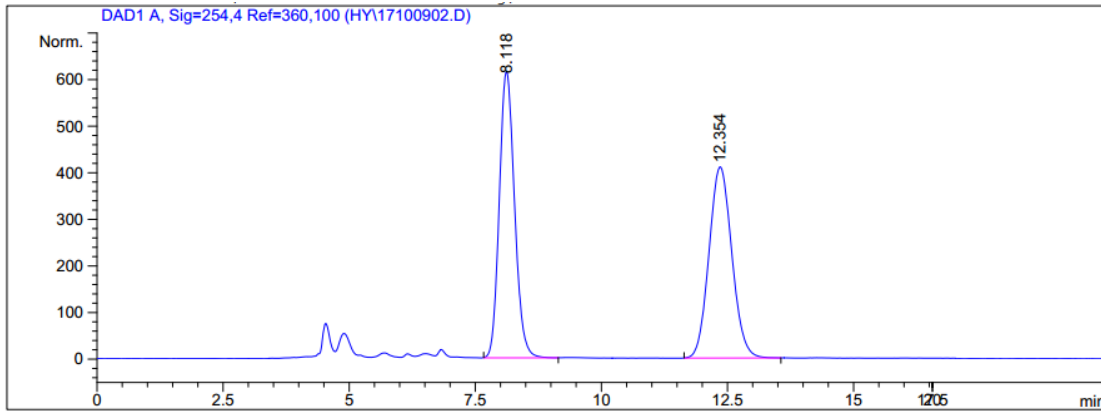

| Peak # | RetTime [min] | Type | Width [min] | Area [mAU*s] | Height [mAU] | Area %  |
|--------|---------------|------|-------------|--------------|--------------|---------|
| 1      | 8.118         | BB   | 0.3290      | 1.29060e4    | 614.63336    | 49.9738 |
| 2      | 12.354        | BB   | 0.4955      | 1.29196e4    | 410.17297    | 50.0262 |

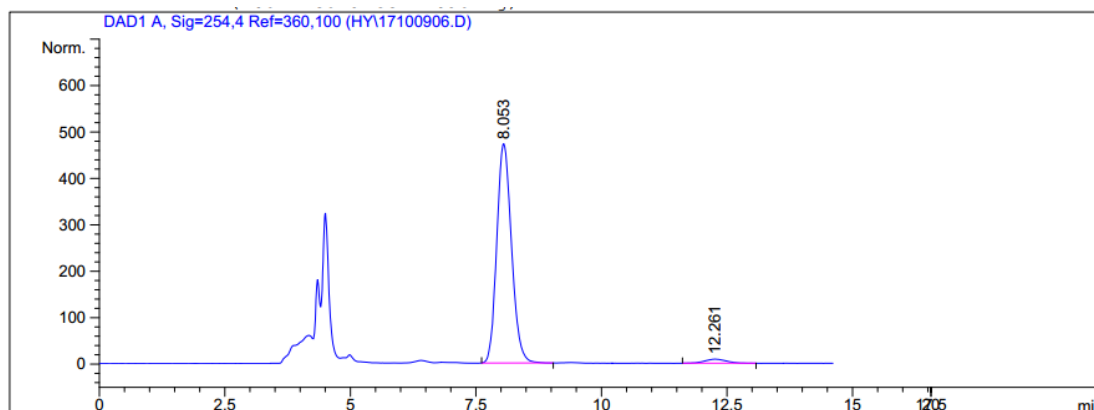

| Peak # | RetTime [min] | Type | Width [min] | Area [mAU*s] | Height [mAU] | Area %  |
|--------|---------------|------|-------------|--------------|--------------|---------|
| 1      | 8.053         | BP   | 0.3175      | 9614.10156   | 472.31683    | 97.2807 |
| 2      | 12.261        | BB   | 0.4777      | 268.74646    | 8.76637      | 2.7193  |

#### 4ea

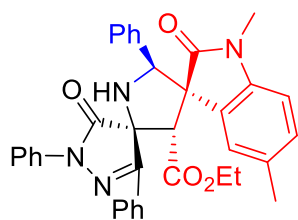

4ea

Prepared according to the procedure within 96 has White solid (97.0 mg, 83% yield, dr > 20:1). mp 129.0 – 129.6 °C;  $[\alpha]_D^{25} = -318.26$  (*c* 0.56, CH<sub>2</sub>Cl<sub>2</sub>); <sup>1</sup>H NMR (400 MHz, CDCl<sub>3</sub>) δ 8.75 – 8.65 (m, 2H), 8.16 – 8.09 (m, 2H), 7.91 (s, 1H), 7.65 – 7.59 (m, 2H), 7.55 – 7.46 (m, 3H), 7.28 – 7.24 (m, 2H), 7.23 – 7.16 (m, 3H), 7.14 – 7.06 (m, 3H), 6.59 (d, *J* = 7.8 Hz, 1H), 5.93 (d, *J* = 3.8 Hz, 1H), 4.71 (s, 1H), 3.79 – 3.45 (m, 2H), 2.77 (s, 3H), 2.61 (d, *J* = 4.0 Hz, 1H), 2.44 (s, 3H), 0.51 (t, *J* = 7.1 Hz, 3H); <sup>13</sup>C NMR (101 MHz, CDCl<sub>3</sub>) δ 177.39, 175.07, 167.77, 155.17, 141.56, 138.21, 136.47, 132.93, 130.72, 129.64, 129.59, 128.99, 128.91, 128.88, 128.11, 127.88, 127.66, 126.69, 126.23, 125.30, 119.27, 107.21, 70.83, 69.18, 60.80, 60.51, 58.35, 26.04, 21.48, 13.18; HRMS (ESI) *m/z* Calcd. for C<sub>36</sub>H<sub>33</sub>N<sub>4</sub>O<sub>4</sub><sup>+</sup> ([M+H]<sup>+</sup>) 585.2496, Found 585.2489; Enantiomeric excess was determined to be 94% (determined by HPLC using chiral AD-H column, hexane/2-propanol = 70/30, λ = 254 nm, 30 °C, 0.8 mL/min, *t*<sub>major</sub> = 6.1 min, *t*<sub>minor</sub> = 8.5 min).

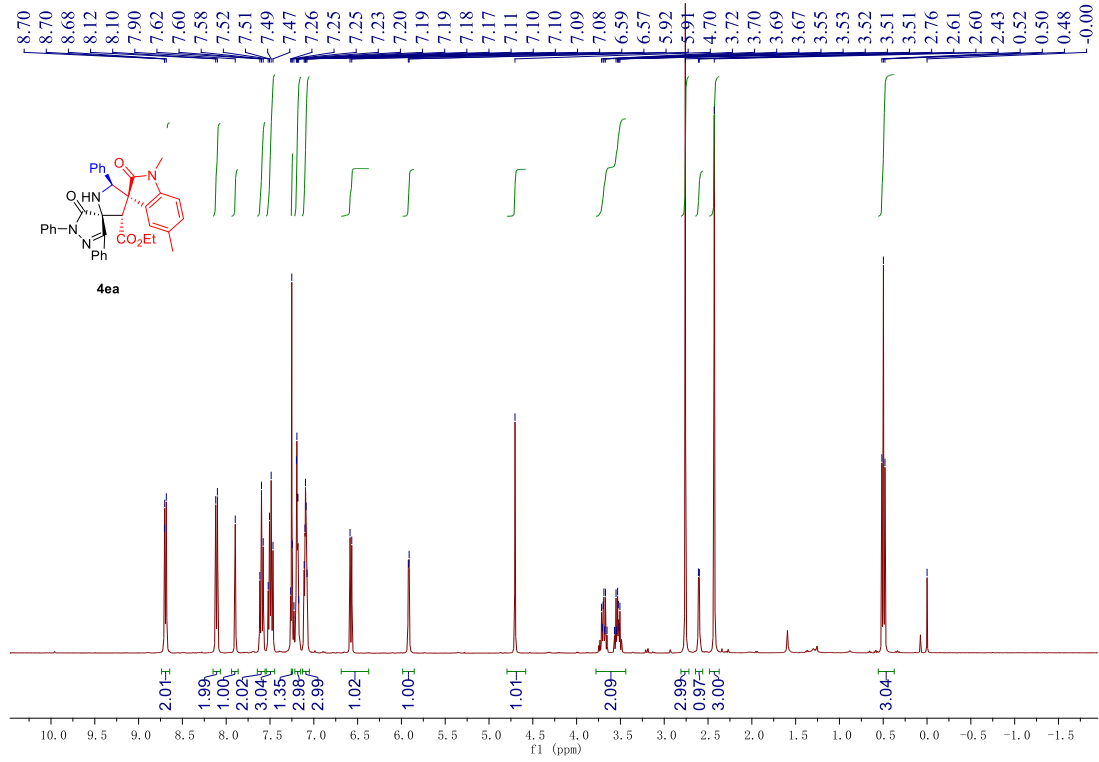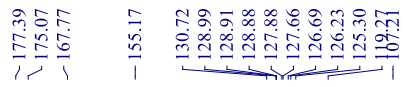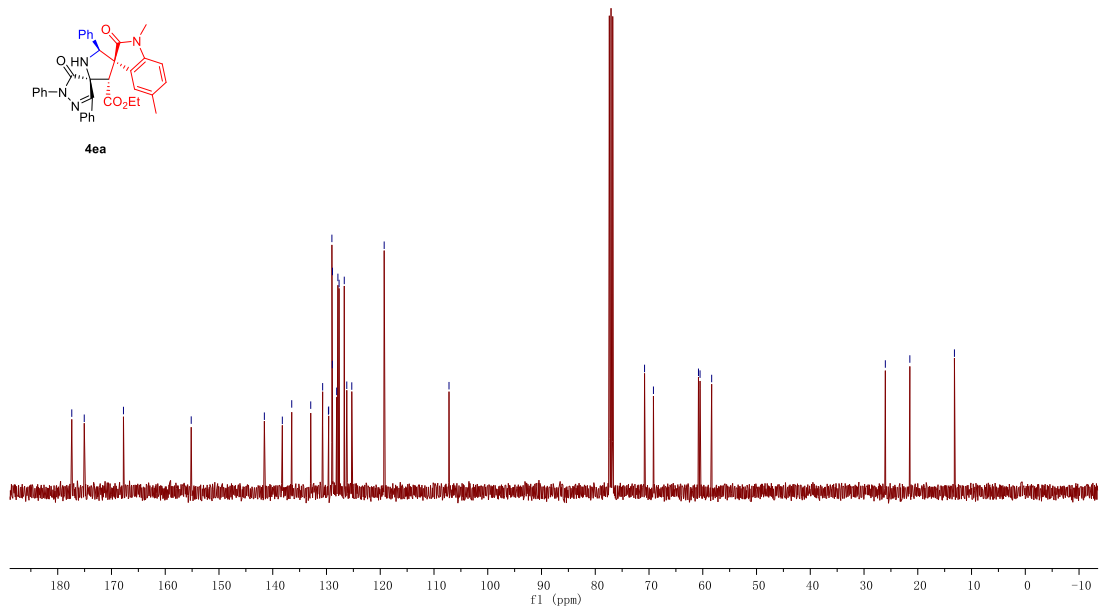

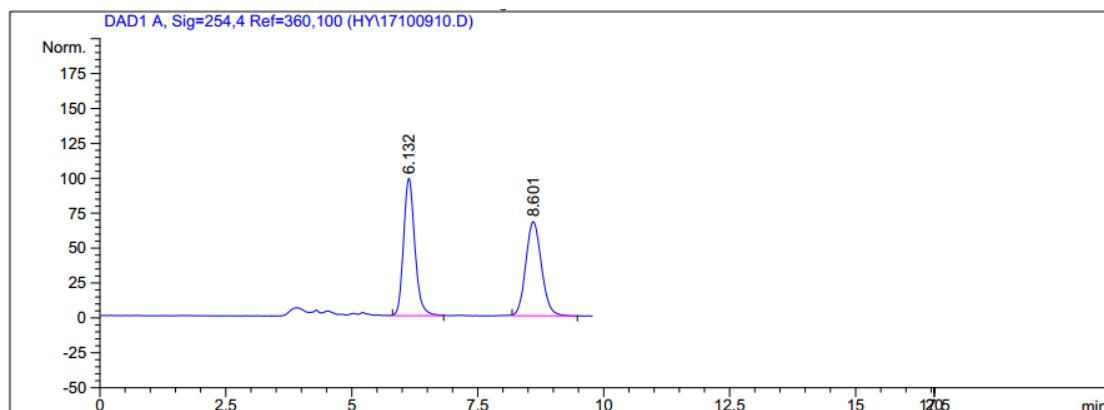

| Peak # | RetTime [min] | Type | Width [min] | Area [mAU*s] | Height [mAU] | Area %  |
|--------|---------------|------|-------------|--------------|--------------|---------|
| 1      | 6.132         | BB   | 0.2419      | 1532.95886   | 98.29766     | 51.2463 |
| 2      | 8.601         | BB   | 0.3365      | 1458.39343   | 67.39500     | 48.7537 |

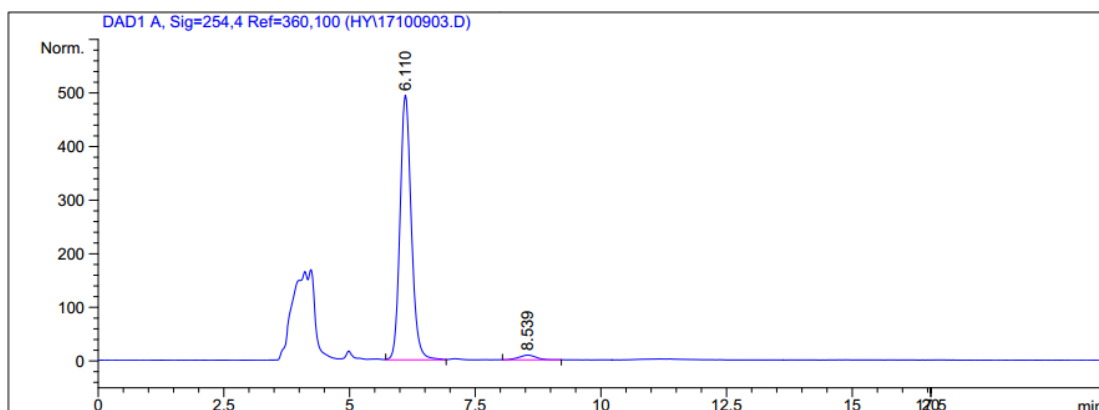

| Peak # | RetTime [min] | Type | Width [min] | Area [mAU*s] | Height [mAU] | Area %  |
|--------|---------------|------|-------------|--------------|--------------|---------|
| 1      | 6.110         | BV   | 0.2421      | 7709.37842   | 493.82007    | 97.2407 |
| 2      | 8.539         | BB   | 0.3718      | 218.76387    | 8.74604      | 2.7593  |

#### 4fa

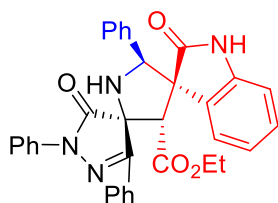

4fa

Prepared according to the procedure within 72 h as White solid (104.5 mg, 94% yield, dr > 20:1). mp 214.6 – 215.6 °C;  $[\alpha]_D^{20} = -261.28$  (*c* 0.36, CH<sub>2</sub>Cl<sub>2</sub>); <sup>1</sup>H NMR (400 MHz, CDCl<sub>3</sub>) δ 8.67 (d, *J* = 7.5 Hz, 2H), 8.12 – 8.05 (m, 3H), 7.62 – 7.55 (m, 2H), 7.54 – 7.44 (m, 3H), 7.25 – 7.07 (m, 8H), 6.71 (d, *J* = 7.6 Hz, 1H), 5.98 (d, *J* = 3.5 Hz, 1H), 4.71 (s, 1H), 3.78 – 3.42 (m, 2H), 2.68 (d, *J* = 3.7 Hz, 1H), 1.26 (s, 1H), 0.51 (t, *J* = 7.1 Hz, 3H); <sup>13</sup>C NMR (101 MHz, CDCl<sub>3</sub>) δ 178.88, 175.08, 167.61, 155.02, 140.83, 138.12, 136.37, 130.69, 130.10, 129.56, 128.99, 128.88, 128.64, 128.28, 128.08, 127.64, 127.04, 126.16, 125.37, 123.41, 119.33, 108.95, 70.73, 69.31, 60.97, 60.43, 58.82, 13.15; HRMS (ESI) *m/z* Calcd. for C<sub>34</sub>H<sub>29</sub>N<sub>4</sub>O<sub>4</sub><sup>+</sup> ([M+H]<sup>+</sup>) 557.2183, Found 557.2175;

Enantiomeric excess was determined to be 73% (determined by HPLC using chiral AD-H column, hexane/2-propanol = 70/30,  $\lambda = 254 \text{ nm}$ ,  $30 \text{ }^\circ\text{C}$ ,  $0.8 \text{ mL/min}$ ,  $t_{\text{major}} = 20.2 \text{ min}$ ,  $t_{\text{minor}} = 9.6 \text{ min}$ ).

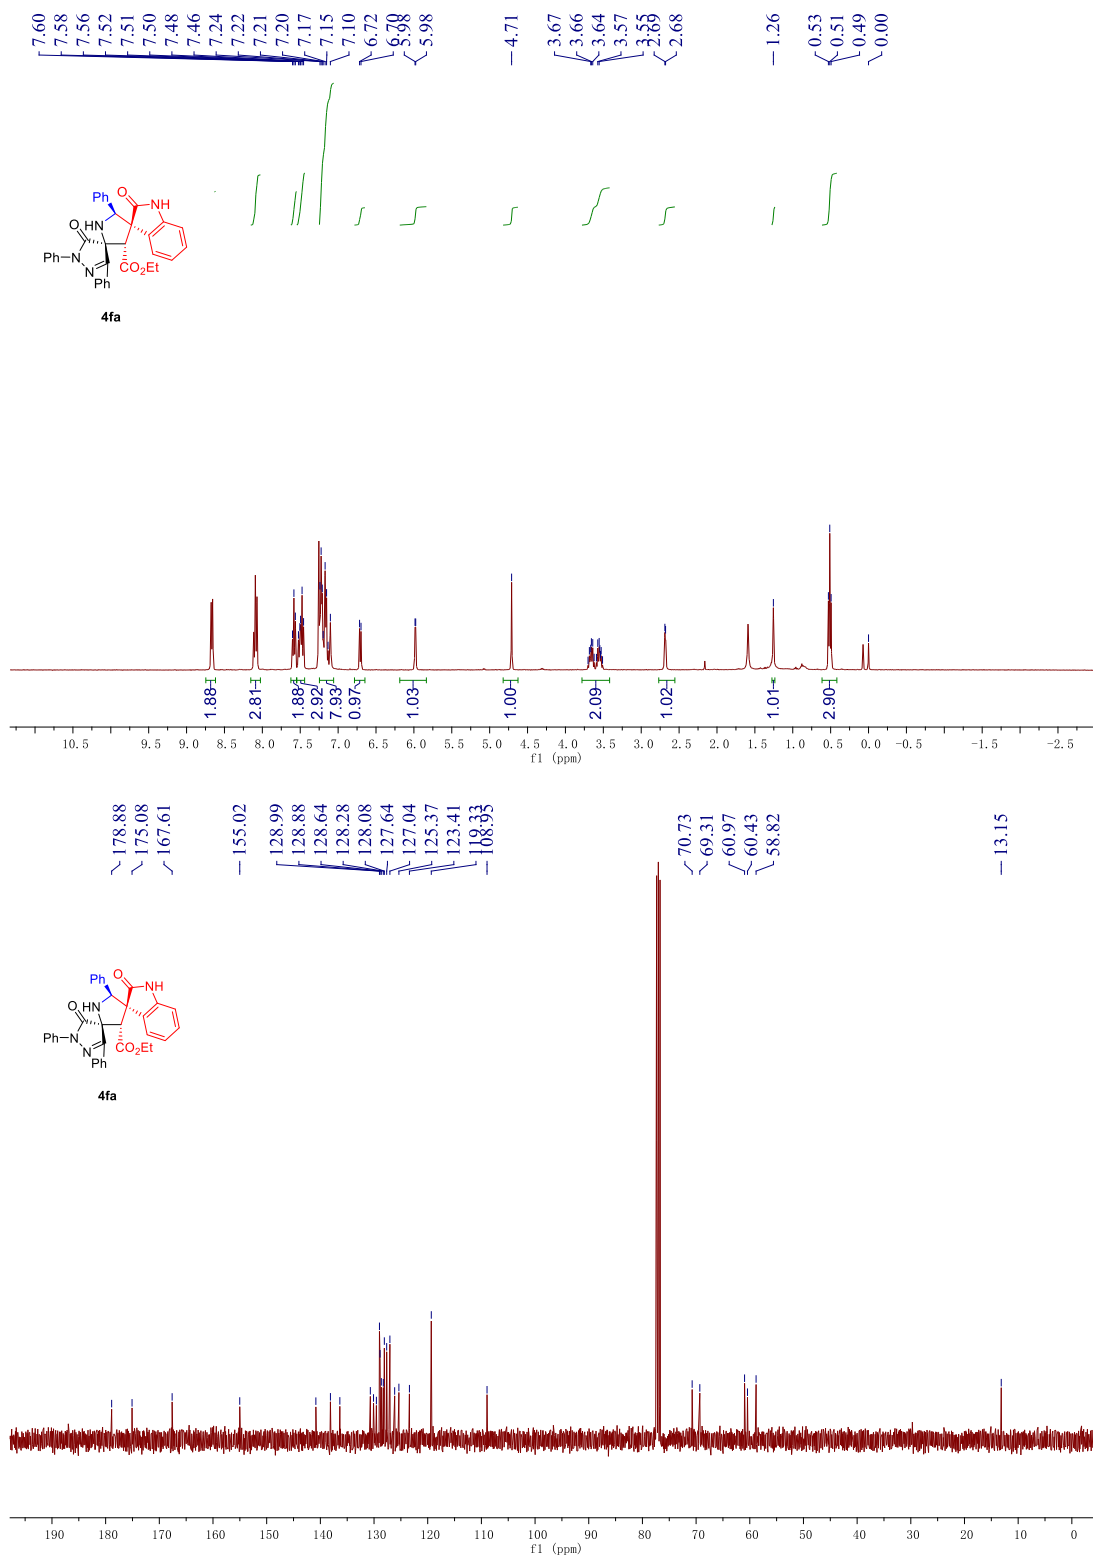

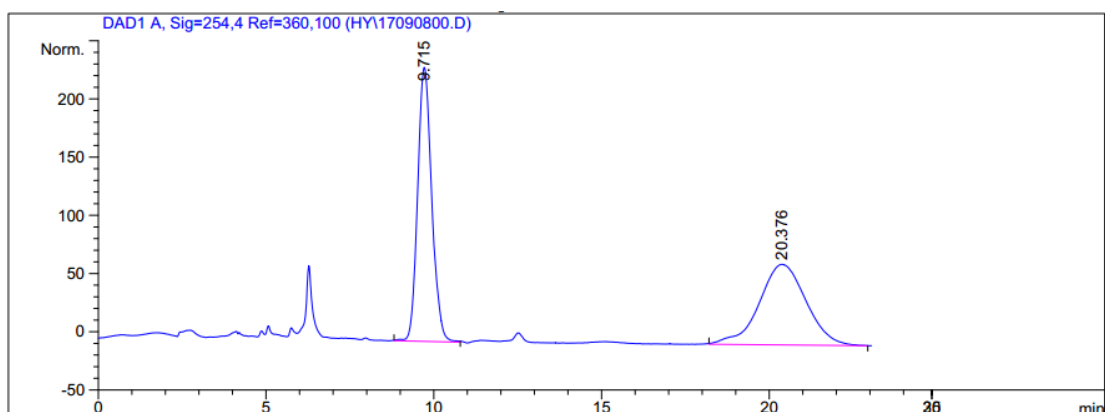

| Peak # | RetTime [min] | Type | Width [min] | Area [mAU*s] | Height [mAU] | Area %  |
|--------|---------------|------|-------------|--------------|--------------|---------|
| 1      | 9.715         | BB   | 0.4484      | 6867.38623   | 235.36469    | 50.5093 |
| 2      | 20.376        | BP   | 1.3657      | 6728.90723   | 69.24541     | 49.4907 |

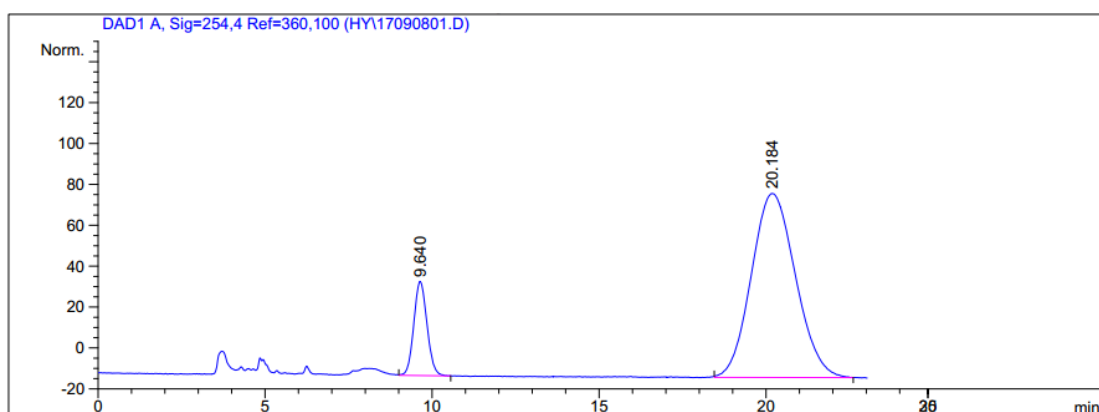

| Peak # | RetTime [min] | Type | Width [min] | Area [mAU*s] | Height [mAU] | Area %  |
|--------|---------------|------|-------------|--------------|--------------|---------|
| 1      | 9.640         | VB   | 0.4289      | 1267.18005   | 46.06562     | 13.2824 |
| 2      | 20.184        | BB   | 1.3886      | 8273.10742   | 89.98389     | 86.7176 |

#### 4ga

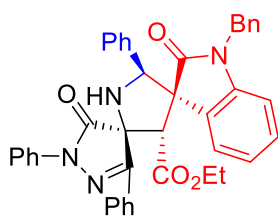

#### 4ga

Prepared according to the procedure within 72 h as White solid (125.3 mg, 97% yield, dr > 20:1). mp 132.6 – 133.2 °C;  $[\alpha]_D^{15} = 308.12$  (c 0.52, CH<sub>2</sub>Cl<sub>2</sub>); <sup>1</sup>H NMR (400 MHz, CDCl<sub>3</sub>) δ 8.71 (d, *J* = 7.6 Hz, 2H), 8.27 – 7.98 (m, 3H), 7.40 – 7.65 (m, 5H), 7.34 – 7.22 (m, 6H), 7.06 – 7.17 (m, 5H), 6.62 – 6.43 (m, 3H), 6.03 (d, *J* = 3.2 Hz, 1H), 4.85 (dd, *J* = 31.6, 15.8 Hz, 2H), 4.31 (d, *J* = 15.9 Hz, 1H), 3.70 – 3.45 (m, 2H), 2.66 (d, *J* = 3.5 Hz, 1H), 0.44 (t, *J* = 7.1 Hz, 3H); <sup>13</sup>C NMR (101 MHz, CDCl<sub>3</sub>) δ 177.74, 175.09, 167.65, 155.05, 143.12, 138.16, 136.38, 135.20, 130.76, 129.64, 129.61, 129.01, 128.94, 128.61, 128.56, 128.41, 128.32, 127.68, 127.56, 127.22, 126.65, 125.72, 125.37, 123.48, 119.32, 108.62, 70.73, 69.31, 60.90, 60.20, 59.38, 43.93, 13.12; HRMS (ESI)



m/z Calcd. for  $C_{41}H_{35}N_4O_4^+$  ( $[M+H]^+$ ) 647.2653, Found 647.2642; Enantiomeric excess was determined to be 87% (determined by HPLC using chiral AD-H column, hexane/2-propanol = 70/30,  $\lambda = 254$  nm, 30 °C, 0.8 mL/min,  $t_{major} = 8.6$  min,  $t_{minor} = 20.2$  min).

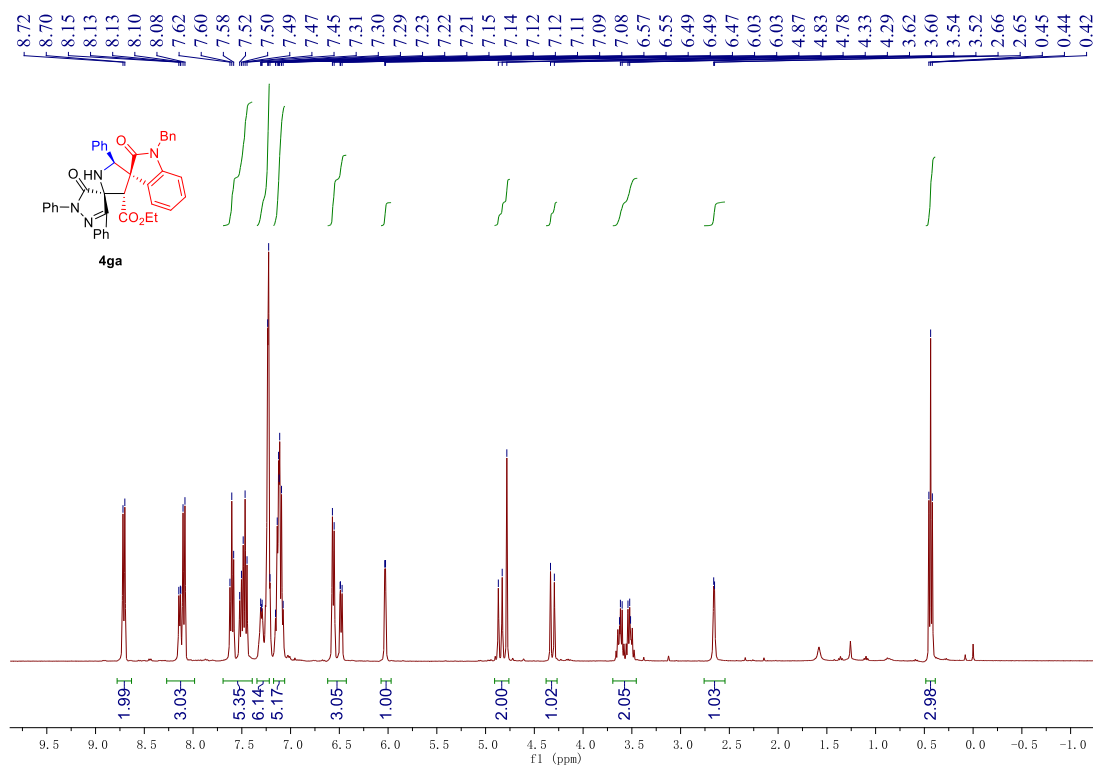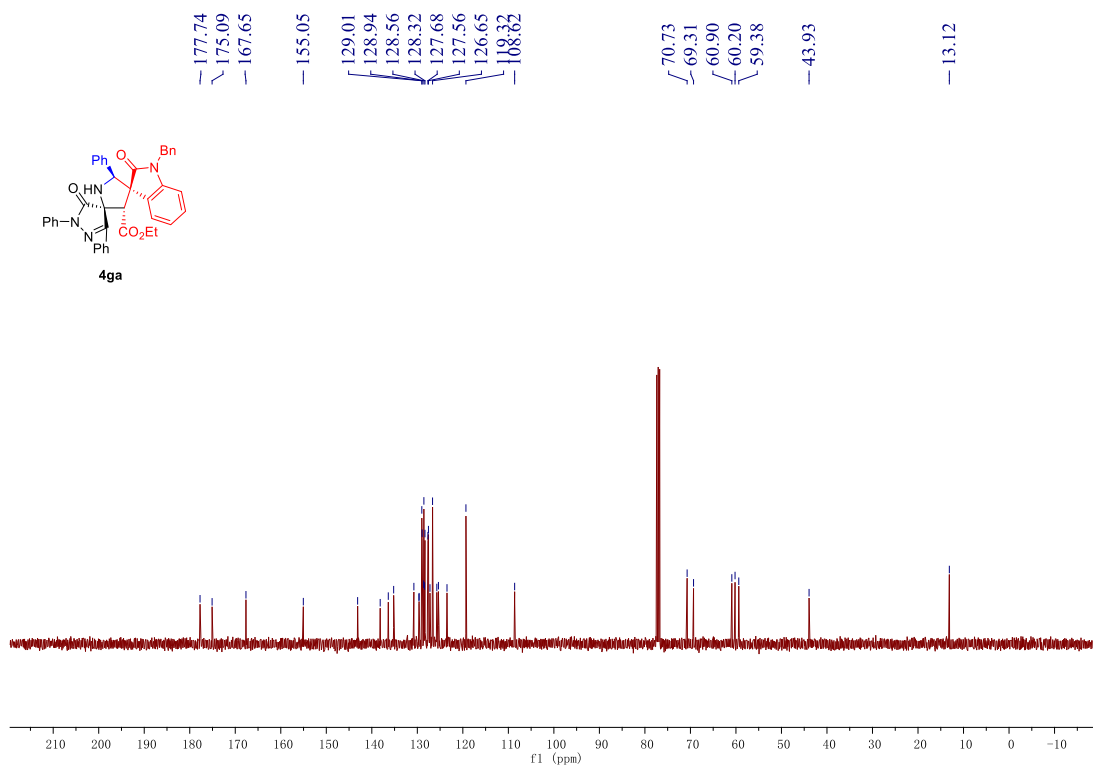

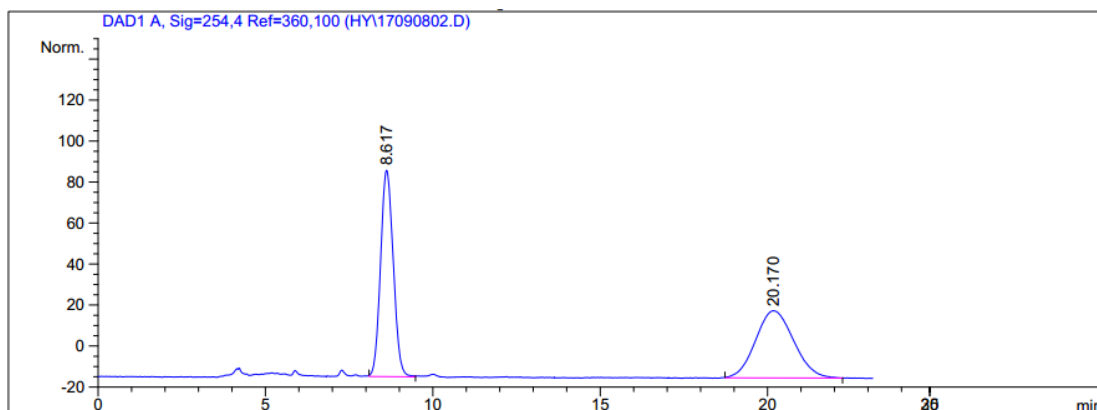

| Peak # | RetTime [min] | Type | Width [min] | Area [mAU*s] | Height [mAU] | Area %  |
|--------|---------------|------|-------------|--------------|--------------|---------|
| 1      | 8.617         | BB   | 0.4153      | 2653.98486   | 100.75963    | 50.5429 |
| 2      | 20.170        | BB   | 1.0840      | 2596.96558   | 32.78823     | 49.4571 |

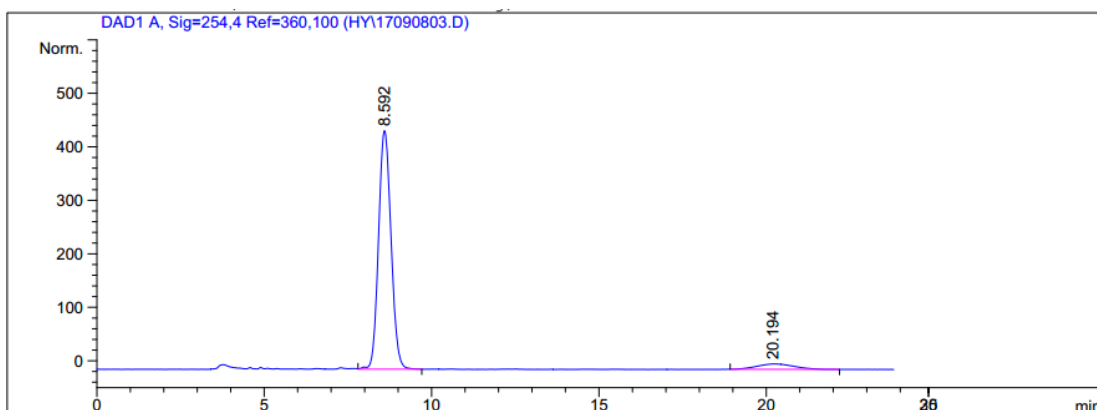

| Peak # | RetTime [min] | Type | Width [min] | Area [mAU*s] | Height [mAU] | Area %  |
|--------|---------------|------|-------------|--------------|--------------|---------|
| 1      | 8.592         | VB   | 0.4060      | 1.15393e4    | 445.73947    | 93.6033 |
| 2      | 20.194        | BB   | 0.9335      | 788.57892    | 10.15983     | 6.3967  |

#### 4ha

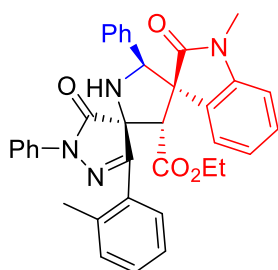

4ha

Prepared according to the procedure within 96 h as White solid (108.6 mg, 93% yield, dr > 20:1). mp 115.2 – 116.2 °C;  $[\alpha]_D^{19} = -333.70$  (*c* 0.86, CH<sub>2</sub>Cl<sub>2</sub>); <sup>1</sup>H NMR (400 MHz, CDCl<sub>3</sub>) δ 8.89 (d, *J* = 7.8 Hz, 1H), 8.07 (dd, *J* = 15.5, 7.8 Hz, 3H), 7.53 (dd, *J* = 7.5 Hz, 1H), 7.52 – 7.41 (m, 2H), 7.37 (dd, *J* = 7.4 Hz, 1H), 7.32 (d, *J* = 7.5 Hz, 1H), 7.26 (dd, *J* = 7.6 Hz, 1H), 7.22 (d, *J* = 9.5 Hz, 1H), 7.19 – 7.11 (m, 4H), 7.07 – 7.00 (m, 2H), 6.63 (d, *J* = 7.7 Hz, 1H), 5.84 (d, *J* = 4.1 Hz, 1H), 4.40 (s, 1H), 3.68 – 3.50 (m, 2H), 2.70 (s, 3H), 2.63 (s, 3H), 2.50 (d, *J* = 4.2 Hz, 1H), 0.50 (t, *J* = 7.1 Hz, 3H); <sup>13</sup>C NMR (101 MHz, CDCl<sub>3</sub>) δ 177.13, 174.16, 167.81, 155.99, 143.81, 138.69, 138.30, 136.47, 131.89, 130.16, 129.82, 129.75, 129.05,

128.60, 128.56, 128.13, 127.90, 126.81, 126.18, 125.66, 125.19, 123.34, 118.99, 107.36, 71.99, 69.16, 60.86, 60.04, 57.83, 25.96, 22.91, 13.22; HRMS (ESI)  $m/z$  Calcd. for  $C_{36}H_{33}N_4O_4^+$  ( $[M+H]^+$ ) 585.2496, Found 585.2485; Enantiomeric excess was determined to be 97% (determined by HPLC using chiral AD-H column, hexane/2-propanol = 70/30,  $\lambda = 254$  nm, 30 °C, 0.8 mL/min,  $t_{major} = 10.0$  min,  $t_{minor} = 11.9$  min).

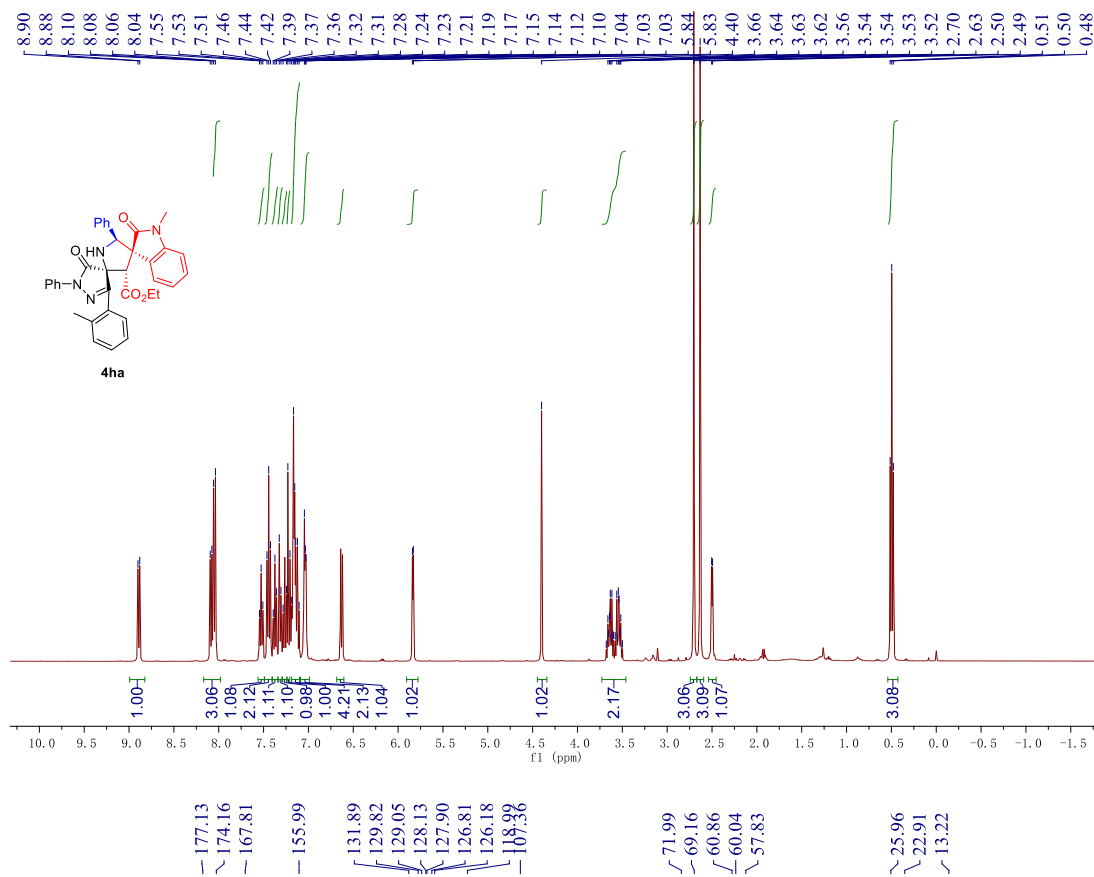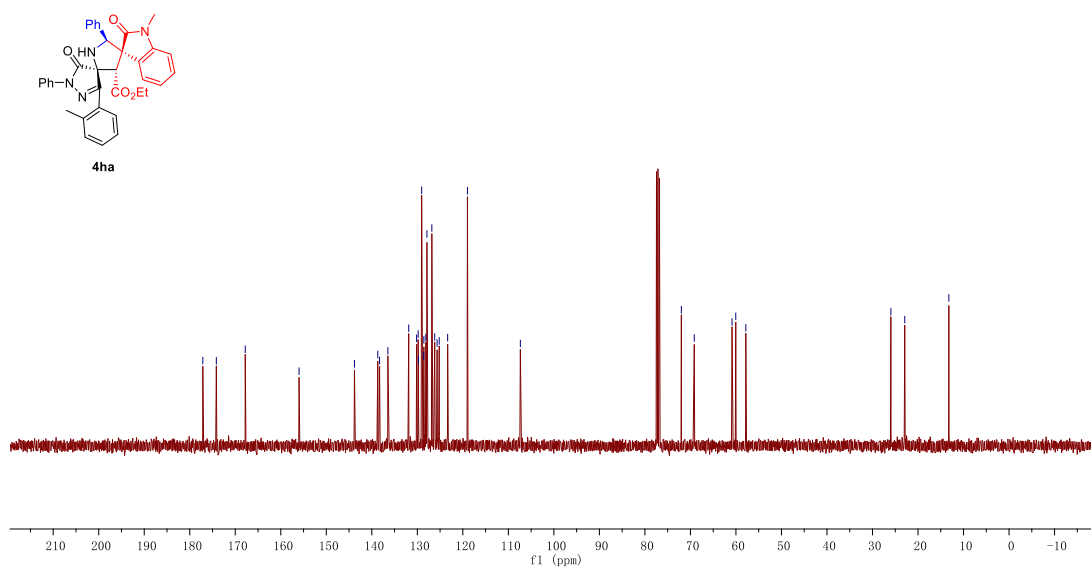

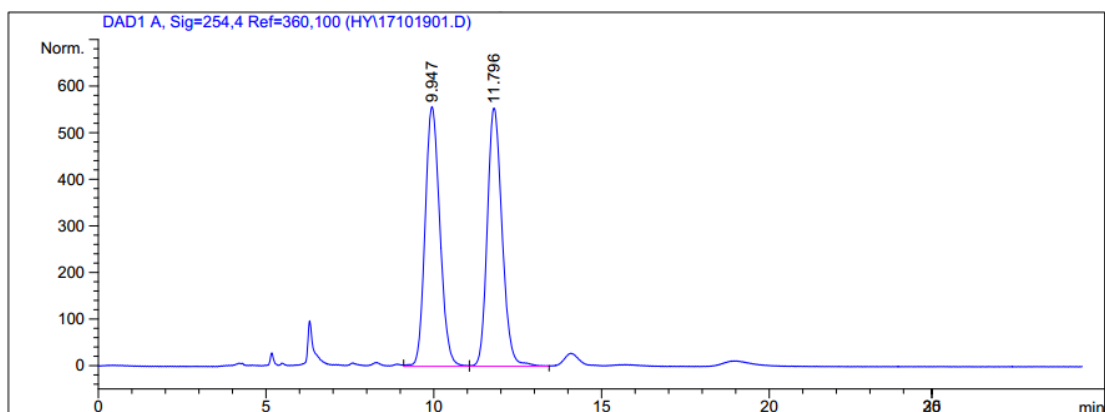

| Peak # | RetTime [min] | Type | Width [min] | Area [mAU*s] | Height [mAU] | Area %  |
|--------|---------------|------|-------------|--------------|--------------|---------|
| 1      | 9.947         | VV   | 0.4798      | 1.69987e4    | 557.46118    | 50.1127 |
| 2      | 11.796        | VB   | 0.4722      | 1.69223e4    | 554.29669    | 49.8873 |

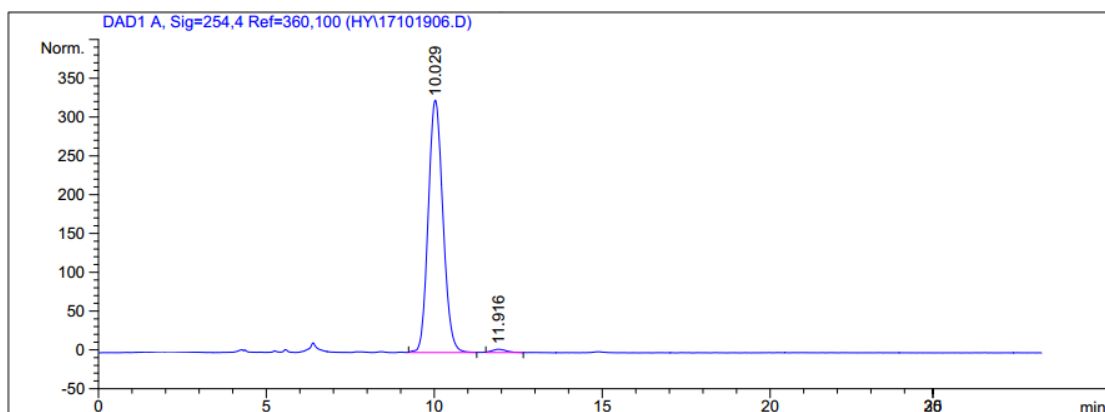

| Peak # | RetTime [min] | Type | Width [min] | Area [mAU*s] | Height [mAU] | Area %  |
|--------|---------------|------|-------------|--------------|--------------|---------|
| 1      | 10.029        | BB   | 0.4741      | 9868.39551   | 325.17874    | 98.7389 |
| 2      | 11.916        | BB   | 0.4241      | 126.04471    | 4.22391      | 1.2611  |

#### 4ia

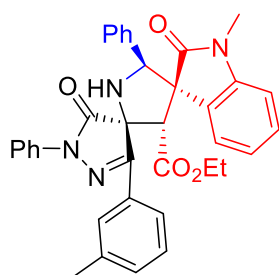

4ia

Prepared according to the procedure within 96 h as White solid (99.3 mg, 85% yield, dr > 20:1). mp 123.2 – 124.3 °C;  $[\alpha]_D^{17} = -239.93$  (*c* 0.57, CH<sub>2</sub>Cl<sub>2</sub>); <sup>1</sup>H NMR (400 MHz, CDCl<sub>3</sub>) δ 8.71 (d, *J* = 7.6 Hz, 2H), 8.12 (d, *J* = 7.7 Hz, 3H), 7.46 – 7.56 (m, 5H), 7.33 (dd, *J* = 7.5 Hz, 1H), 7.26 (d, *J* = 7.4 Hz, 1H), 7.19 (dd, *J* = 7.5 Hz, 1H), 7.11 (dd, *J* = 7.5 Hz, 1H), 7.03 (d, *J* = 7.5 Hz, 1H), 6.95 (d, *J* = 7.6 Hz, 1H), 6.82 (s, 1H), 6.72 (d, *J* = 7.7 Hz, 1H), 5.91 (s, 1H), 4.73 (s, 1H), 3.75 – 3.47 (m, 2H), 2.83 (s, 3H), 2.63 (d, *J* = 17.8 Hz, 1H), 2.23 (s, 3H), 0.53 (t, *J* = 7.1 Hz, 3H); <sup>13</sup>C NMR (101 MHz, CDCl<sub>3</sub>) δ 177.44, 175.09, 167.73, 155.14, 143.93, 138.18, 137.31, 136.40, 130.70, 129.82, 129.59, 128.99, 128.88, 128.81, 128.62,

127.80, 127.65, 127.27, 125.64, 125.30, 123.68, 123.40, 119.28, 107.32, 70.85, 69.16, 60.84, 60.39, 58.48, 26.05, 21.44, 13.17; HRMS (ESI)  $m/z$  Calcd. for  $C_{36}H_{33}N_4O_4^+$  ( $[M+H]^+$ ) 585.2496, Found 585.2494; Enantiomeric excess was determined to be 99% (determined by HPLC using chiral AD-H column, hexane/2-propanol = 70/30,  $\lambda = 254$  nm, 30 °C, 0.8 mL/min,  $t_{major} = 11.1$  min,  $t_{minor} = 18.1$  min).

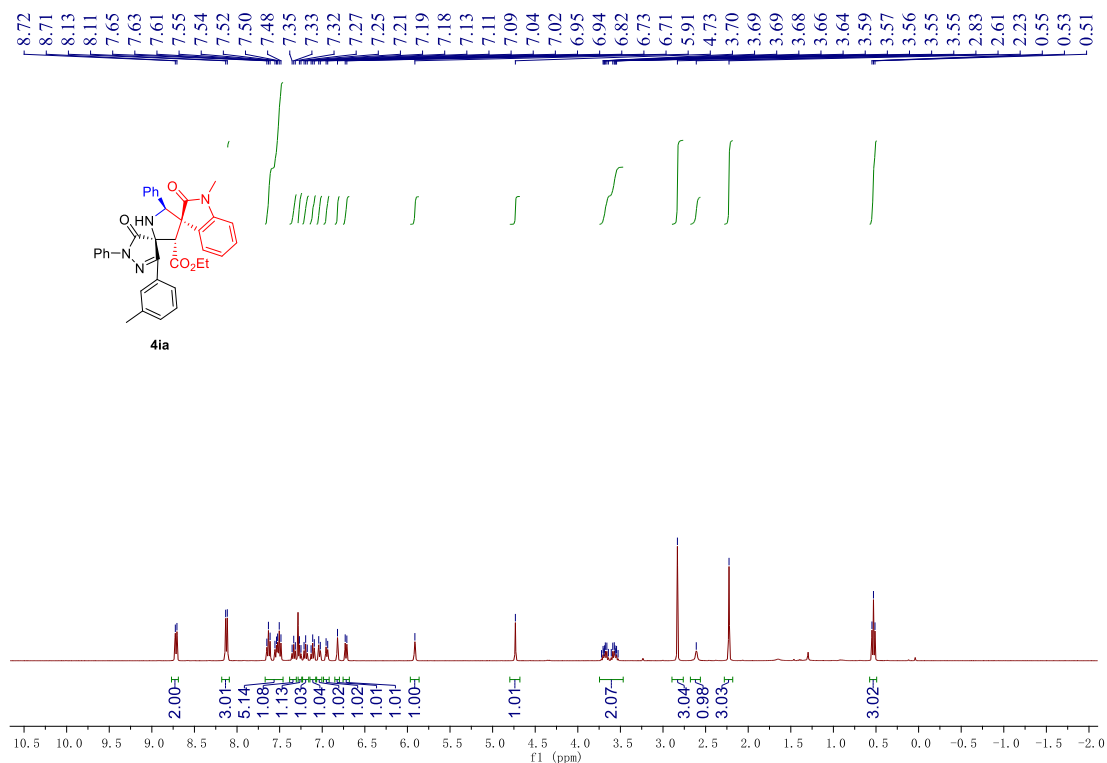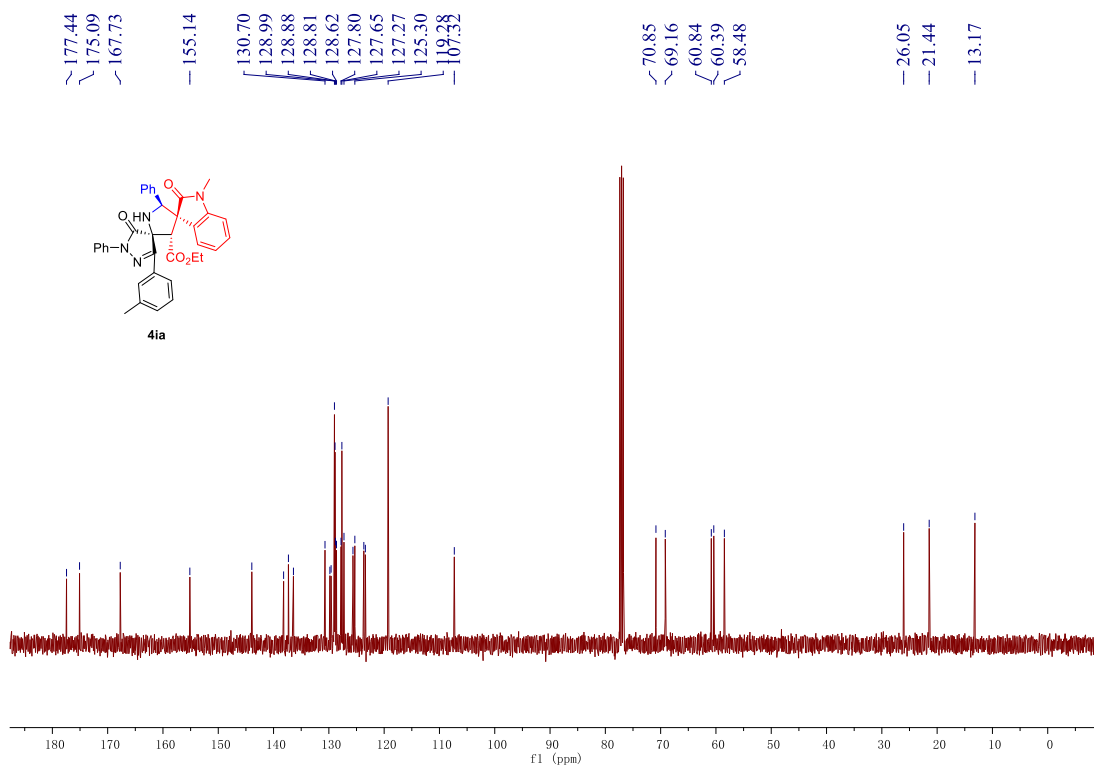

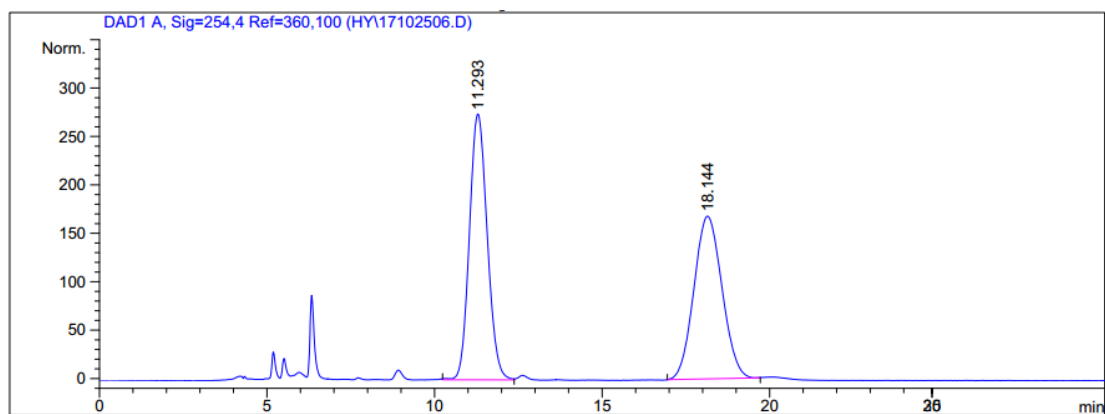

| Peak # | RetTime [min] | Type | Width [min] | Area [mAU*s] | Height [mAU] | Area %  |
|--------|---------------|------|-------------|--------------|--------------|---------|
| 1      | 11.293        | BV   | 0.5745      | 1.01308e4    | 274.53659    | 50.8869 |
| 2      | 18.144        | BB   | 0.9068      | 9777.69531   | 168.04346    | 49.1131 |

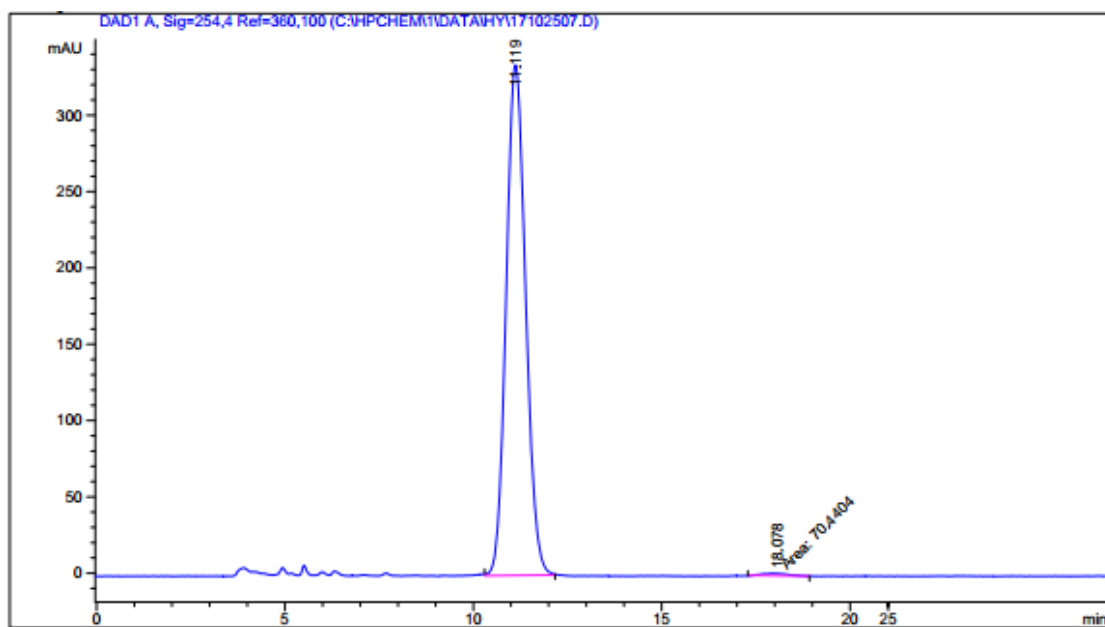

| Peak # | RetTime [min] | Type | Width [min] | Area [mAU*s] | Height [mAU] | Area %  |
|--------|---------------|------|-------------|--------------|--------------|---------|
| 1      | 11.119        | BB   | 0.5539      | 1.19781e4    | 334.40463    | 99.4154 |
| 2      | 18.078        | MM   | 0.7875      | 70.44043     | 1.49080      | 0.5846  |

4ja

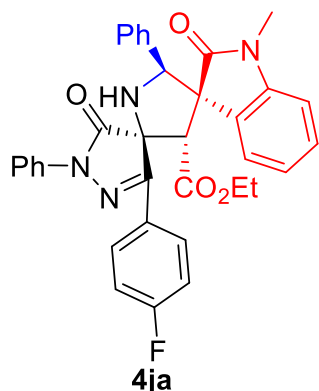

Prepared according to the procedure within 84 h as White solid (96.5 mg, 82% yield, dr > 20:1). mp 128.5.0 – 129.2 °C;  $[\alpha]_D^{18} = -328.99$  (*c* 0.75.9, CH<sub>2</sub>Cl<sub>2</sub>); <sup>1</sup>H NMR (400 MHz, CDCl<sub>3</sub>) δ 8.76 – 8.66 (m, 2H), 8.13 – 8.02 (m, 3H), 7.50 – 7.44 (m, 2H), 7.35 – 7.26 (m, 3H), 7.25 (d, *J* = 7.4 Hz, 1H), 7.23 – 7.14 (m, 4H), 7.10 – 7.05 (m, 2H), 6.70 (d, *J* = 7.6 Hz, 1H), 5.93 (d, *J* = 7.4 Hz, 1H), 4.64 (s, 1H), 3.74 – 3.41 (m, 2H), 2.79 (s, 3H), 2.64 (t, *J* = 8.6 Hz, 1H), 0.49 (t, *J* = 7.1 Hz, 3H); <sup>19</sup>F NMR (376 MHz, CDCl<sub>3</sub>) δ -108.68; <sup>13</sup>C NMR (101 MHz, CDCl<sub>3</sub>) δ 177.49, 174.89, 167.60, 154.37, 143.82, 138.05, 136.37, 129.96, 129.88, 129.58, 129.03, 128.71, 128.22, 127.94, 126.64, 125.80 (d, *J* = 3.2 Hz), 125.58, 125.36, 123.50, 119.18, 116.02 (d, *J* = 21.6 Hz), 107.50, 70.70, 69.13, 60.91, 60.31, 58.43, 26.03, 13.16; HRMS (ESI) *m/z* Calcd. for C<sub>35</sub>H<sub>30</sub>FN<sub>4</sub>O<sub>4</sub><sup>+</sup> ([M+H]<sup>+</sup>) 589.2246, Found 589.2228; Enantiomeric excess was determined to be 99%(determined by HPLC using chiral AD-H column, hexane/2-propanol = 70/30, λ = 254 nm, 30 °C, 0.8 mL/min, *t*<sub>major</sub> = 8.4 min *t*<sub>minor</sub> = 18.7 min).

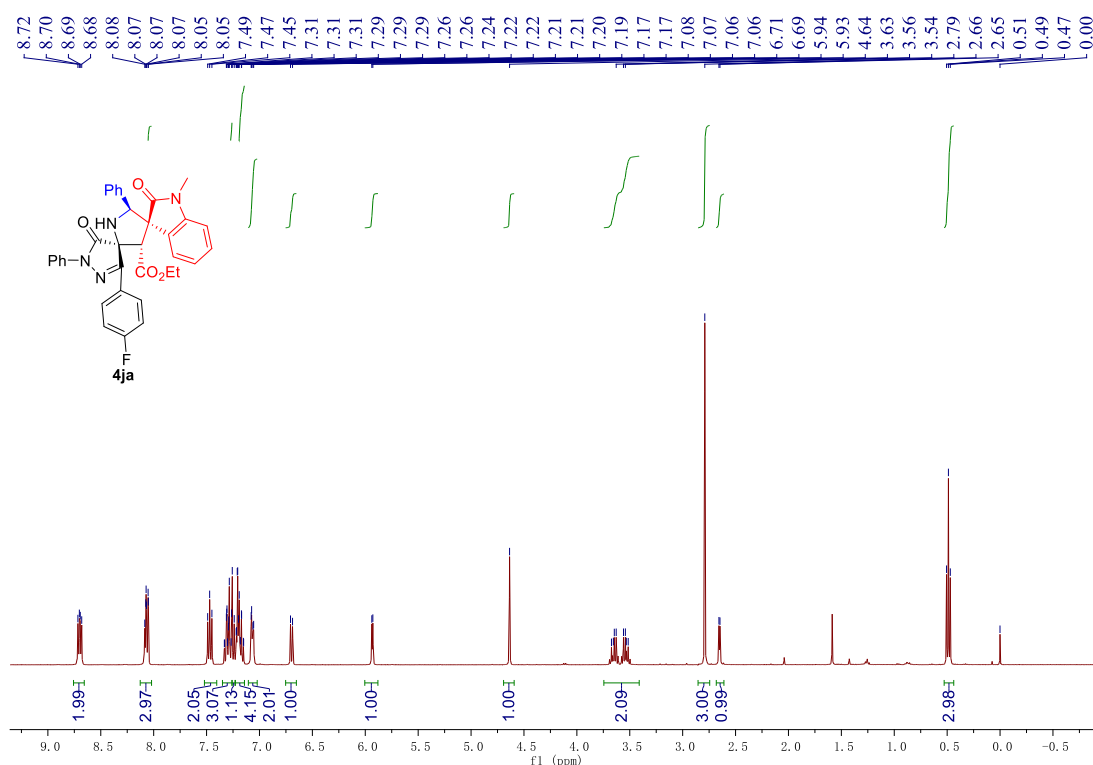

177.4857  
 174.8862  
 167.6005  
 154.3652  
 143.8194  
 136.3674  
 129.9616  
 129.8782  
 129.5752  
 129.0321  
 128.7056  
 128.2162  
 127.9430  
 126.6420  
 125.5830  
 125.3622  
 123.4992  
 119.1839  
 116.1241  
 115.9093  
 107.8370  
 107.7876  
 69.1283  
 60.9084  
 60.3123  
 58.4330  
 26.0280  
 13.1593

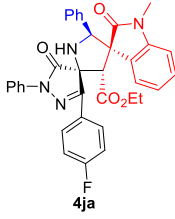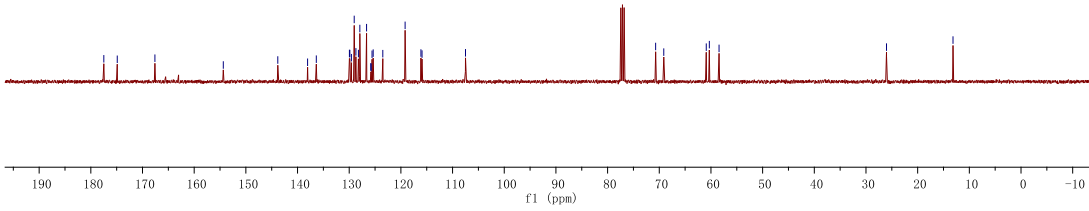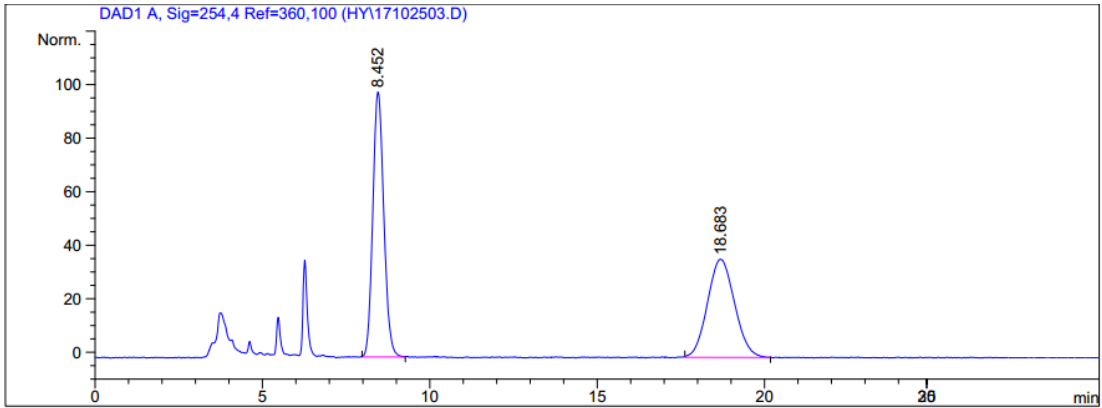

| Peak # | RetTime [min] | Type | Width [min] | Area [mAU*s] | Height [mAU] | Area %  |
|--------|---------------|------|-------------|--------------|--------------|---------|
| 1      | 8.452         | BB   | 0.3543      | 2260.18335   | 99.02084     | 52.3003 |
| 2      | 18.683        | BB   | 0.8436      | 2061.36646   | 36.68541     | 47.6997 |

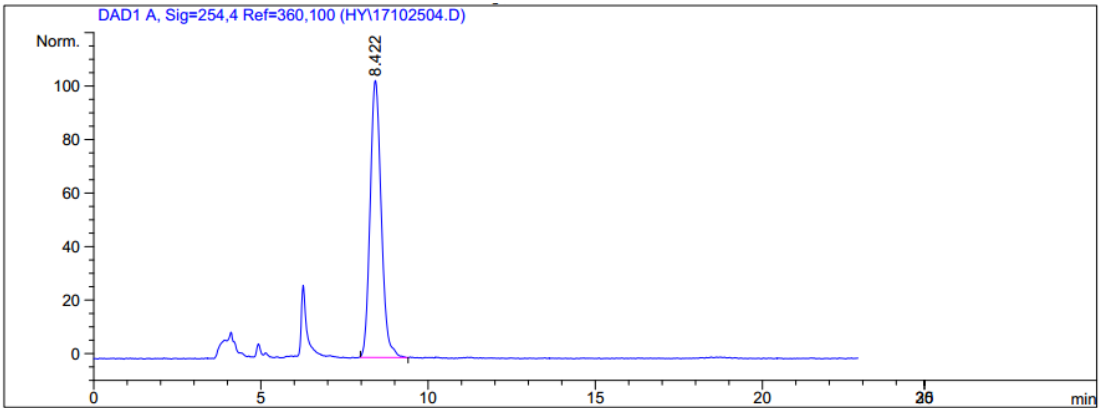



| Peak # | RetTime [min] | Type | Width [min] | Area [mAU*s] | Height [mAU] | Area %   |
|--------|---------------|------|-------------|--------------|--------------|----------|
| 1      | 8.422         | BP   | 0.3567      | 2385.19214   | 103.55997    | 100.0000 |

#### 4ka

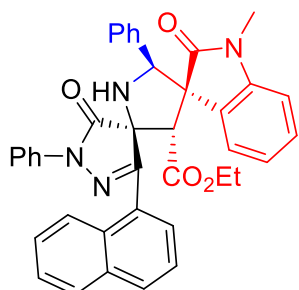

4ka

Prepared according to the procedure within 82 h as White solid (90.5 mg, 73% yield, dr > 20:1). mp 126.8 – 127.9 °C;  $[\alpha]_D^{16} = -221.73$  (*c* 0.65, CH<sub>2</sub>Cl<sub>2</sub>); <sup>1</sup>H NMR (400 MHz, CDCl<sub>3</sub>) δ 9.07 (d, *J* = 7.3 Hz, 1H), 8.89 (d, *J* = 8.3 Hz, 1H), 8.15 – 8.05 (m, 3H), 7.97 (d, *J* = 8.1 Hz, 1H), 7.88 (d, *J* = 7.7 Hz, 1H), 7.75 (dd, *J* = 7.8 Hz, 1H), 7.59 – 7.41 (m, 4H), 7.30 – 7.11 (m, 6H), 7.09 – 7.01 (m, 2H), 6.61 (d, *J* = 7.6 Hz, 1H), 5.88 (d, *J* = 3.8 Hz, 1H), 4.37 (s, 1H), 3.69 – 3.40 (m, 2H), 2.66 (s, 3H), 2.65 (s, 1H), 0.47 (t, *J* = 7.1 Hz, 3H); <sup>13</sup>C NMR (101 MHz, CDCl<sub>3</sub>) δ 177.06, 174.17, 167.91, 155.68, 143.80, 138.25, 136.41, 134.33, 131.59, 131.41, 129.70, 129.12, 128.92, 128.81, 128.59, 128.18, 127.93, 127.42, 126.83, 126.14, 126.05, 125.63, 125.37, 125.28, 123.36, 119.21, 107.39, 72.35, 69.32, 60.88, 59.99, 58.19, 25.94, 13.19; HRMS (ESI) *m/z* Calcd. for C<sub>39</sub>H<sub>33</sub>N<sub>4</sub>O<sub>4</sub><sup>+</sup> ([M+H]<sup>+</sup>) 621.2496, Found 621.2493; Enantiomeric excess was determined to be 97% (determined by HPLC using chiral AD-H column, hexane/2-propanol = 70/30, λ = 254 nm, 30 °C, 0.8 mL/min, *t*<sub>major</sub> = 12.8 min, *t*<sub>minor</sub> = 16.5 min).

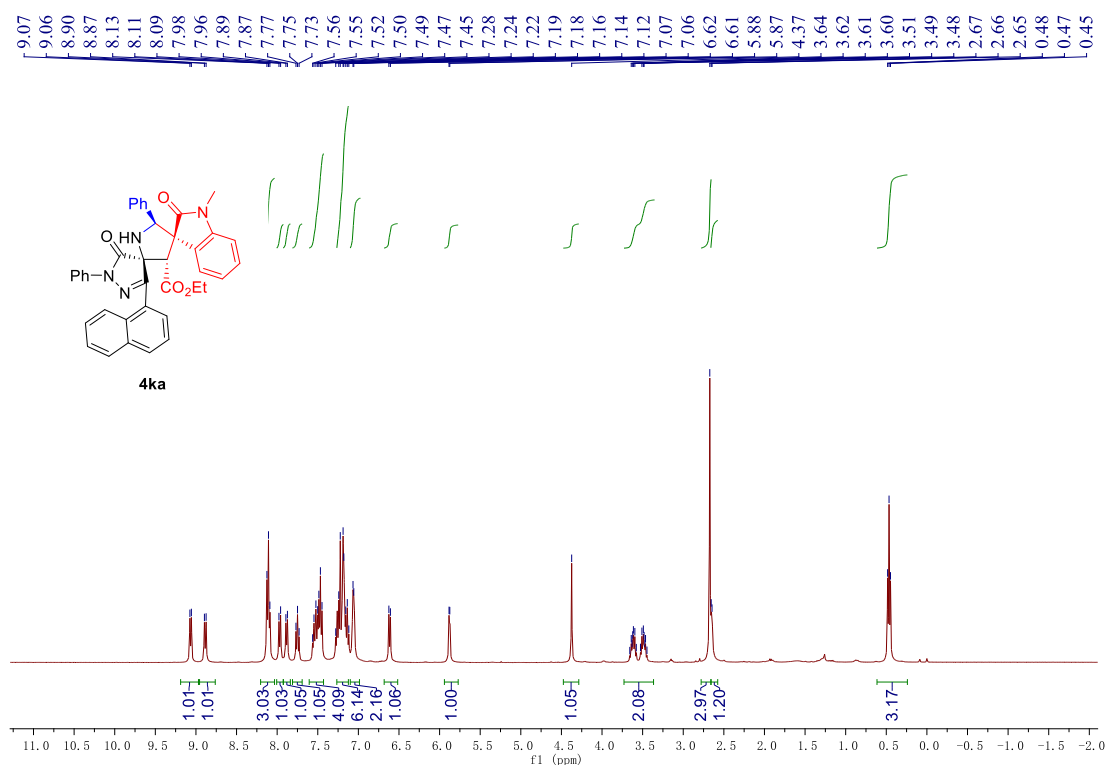

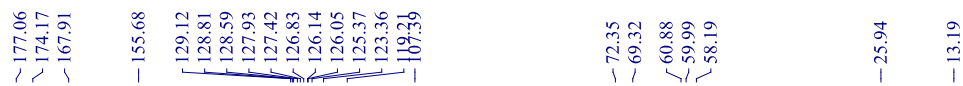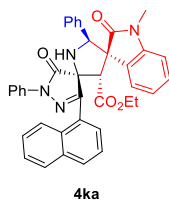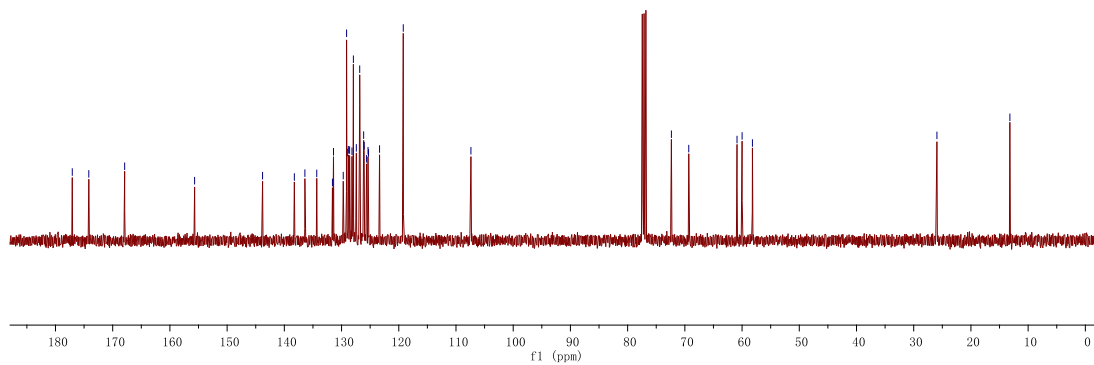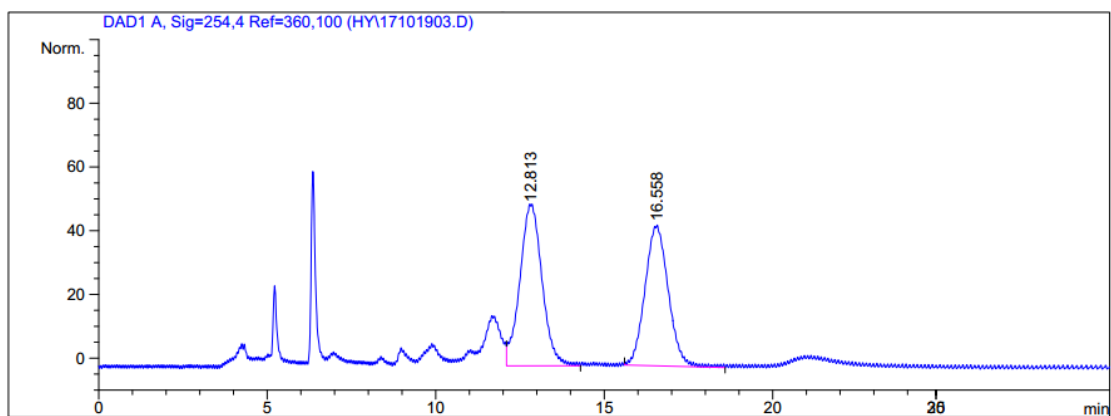

| Peak # | RetTime [min] | Type | Width [min] | Area [mAU*s] | Height [mAU] | Area %  |
|--------|---------------|------|-------------|--------------|--------------|---------|
| 1      | 12.813        | VP   | 0.5851      | 2325.48999   | 50.13725     | 52.2698 |
| 2      | 16.558        | BP   | 0.5818      | 2123.52197   | 44.10070     | 47.7302 |

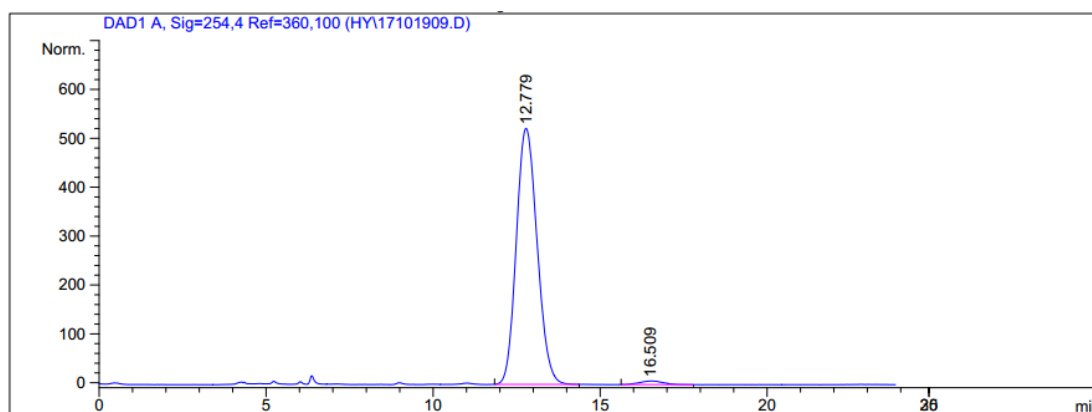

| Peak # | RetTime [min] | Type | Width [min] | Area [mAU*s] | Height [mAU] | Area %  |
|--------|---------------|------|-------------|--------------|--------------|---------|
| 1      | 12.779        | BB   | 0.6815      | 2.27002e4    | 523.90503    | 98.4278 |
| 2      | 16.509        | BP   | 0.6173      | 362.58969    | 7.37825      | 1.5722  |

#### 41a

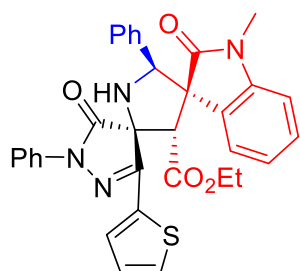

**41a**

Prepared according to the procedure within 96 h as White solid (92.2 mg, 80% yield, dr > 20:1). mp 133.6.8 – 134.1 °C;  $[\alpha]_D^{24} = -331.90$  (*c* 0.72, CH<sub>2</sub>Cl<sub>2</sub>); <sup>1</sup>H NMR (400 MHz, CDCl<sub>3</sub>) δ 8.68 (d, *J* = 3.6 Hz, 1H), 8.07 – 8.01 (m, 3H), 7.46 (dd, *J* = 14.9, 6.9 Hz, 3H), 7.33 – 7.26 (m, 2H), 7.24 – 7.11 (m, 5H), 7.04 (d, *J* = 6.7 Hz, 2H), 6.68 (d, *J* = 7.7 Hz, 1H), 5.84 (d, *J* = 2.7 Hz, 1H), 4.72 (s, 1H), 3.71 – 3.51 (m, 2H), 2.77 (s, 3H), 2.59 (s, 1H), 0.50 (t, *J* = 7.1 Hz, 3H); <sup>13</sup>C NMR (101 MHz, CDCl<sub>3</sub>) δ 177.49, 174.61, 167.54, 152.46, 143.80, 137.98, 136.28, 132.65, 130.93, 129.62, 129.00, 128.79, 128.70, 128.59, 128.19, 127.88, 126.62, 125.60, 125.35, 123.51, 119.28, 107.49, 70.67, 69.62, 60.93, 60.59, 59.47, 26.01, 13.21; HRMS (ESI) *m/z* Calcd. for C<sub>33</sub>H<sub>29</sub>N<sub>4</sub>O<sub>4</sub>S<sup>+</sup> ([M+H]<sup>+</sup>) 577.1904, Found 577.1902; Enantiomeric excess was determined to be 98% (determined by HPLC using chiral AD-H column, hexane/2-propanol = 70/30, λ = 254 nm, 30 °C, 0.8 mL/min, *t*<sub>major</sub> = 12.6 min, *t*<sub>minor</sub> = 17.9 min).

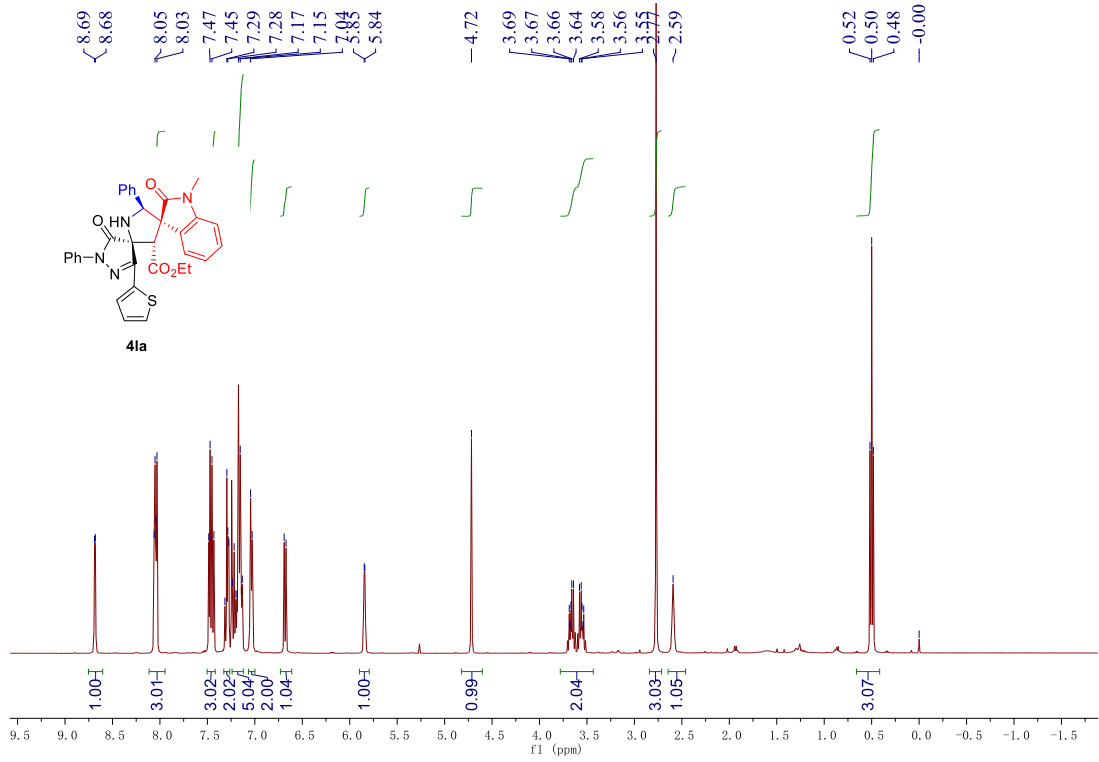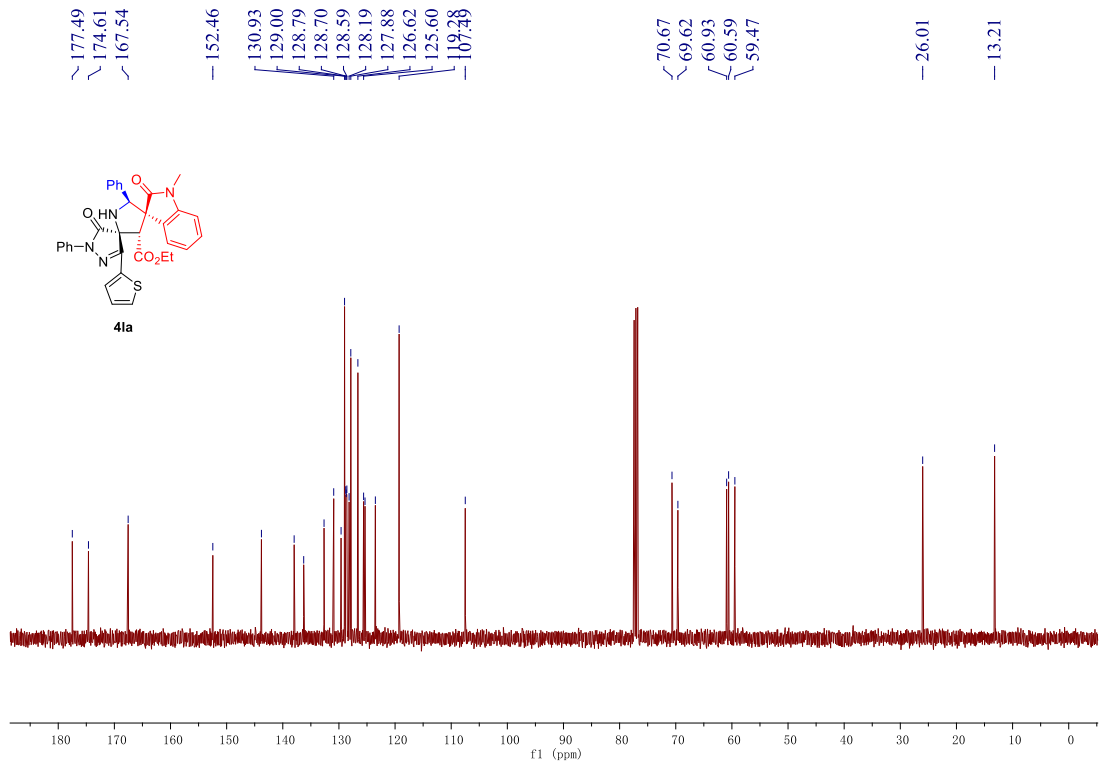

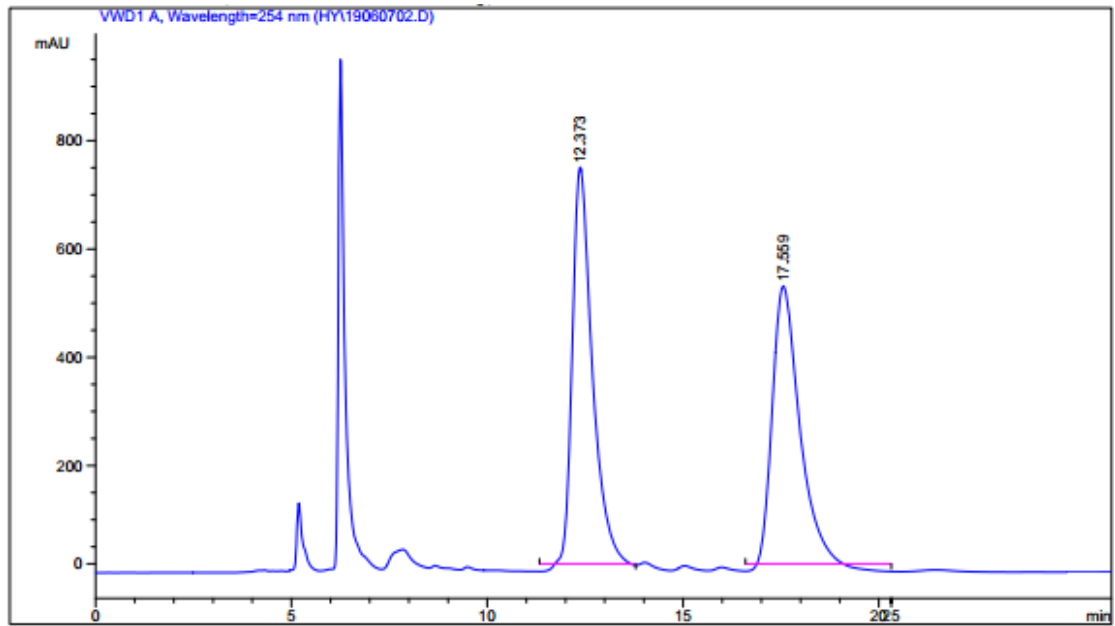

| Peak # | RetTime [min] | Type | Width [min] | Area mAU *s | Height [mAU] | Area %  |
|--------|---------------|------|-------------|-------------|--------------|---------|
| 1      | 12.373        | VV   | 0.5513      | 2.79710e4   | 747.93073    | 50.6356 |
| 2      | 17.559        | VB   | 0.7669      | 2.72688e4   | 528.17114    | 49.3644 |

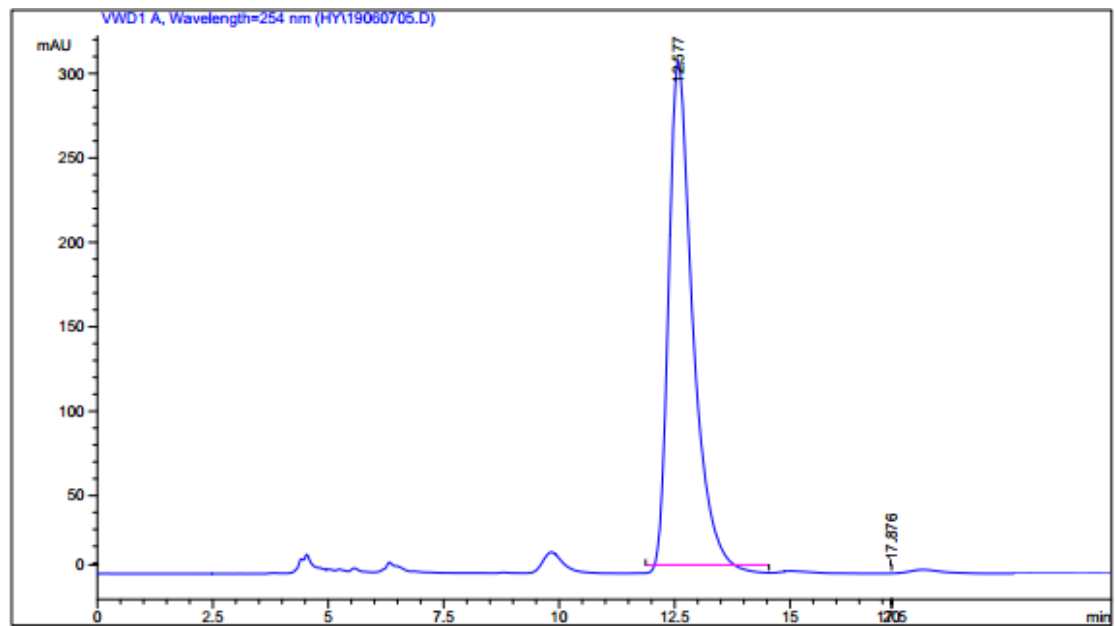

| Peak # | RetTime [min] | Type | Width [min] | Area mAU *s | Height [mAU] | Area %  |
|--------|---------------|------|-------------|-------------|--------------|---------|
| 1      | 12.577        | BB   | 0.5440      | 1.11789e4   | 303.01846    | 99.1009 |
| 2      | 17.876        | BB   | 0.6082      | 101.42113   | 2.21016      | 0.8991  |

**4ma**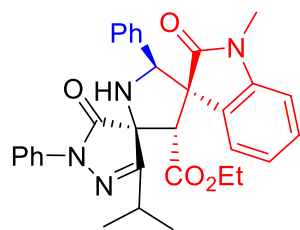**4ma**

Prepared according to the procedure within 86 h as White solid (93.3 mg, 87% yield, dr > 20:1). mp 94.6 – 95.3 °C;  $[\alpha]_D^{18} = -220.77$  ( $c$  0.80,  $\text{CH}_2\text{Cl}_2$ );  $^1\text{H}$  NMR (400 MHz,  $\text{CDCl}_3$ )  $\delta$  8.07 (d,  $J = 7.4$  Hz, 1H), 7.98 (d,  $J = 8.0$  Hz, 2H), 7.47 – 7.40 (m, 2H), 7.28 (dd,  $J = 7.6$  Hz, 1H), 7.19 (d,  $J = 7.5$  Hz, 1H), 7.17 – 7.10 (m, 4H), 6.96 (d,  $J = 6.6$  Hz, 2H), 6.67 (d,  $J = 7.7$  Hz, 1H), 5.71 (s, 1H), 4.37 (s, 1H), 3.75 – 3.61 (m, 2H), 3.16 (dt,  $J = 13.6, 6.8$  Hz, 1H), 2.75 (s, 3H), 2.32 (s, 1H), 1.53 (d,  $J = 6.9$  Hz, 3H), 1.39 (d,  $J = 6.8$  Hz, 3H), 0.56 (t,  $J = 7.1$  Hz, 3H);  $^{13}\text{C}$  NMR (101 MHz,  $\text{CDCl}_3$ )  $\delta$  177.31, 174.33, 167.50, 165.63, 143.71, 138.28, 136.35, 129.56, 128.90, 128.58, 128.08, 127.76, 126.57, 125.75, 124.93, 123.39, 118.98, 107.42, 71.38, 69.52, 60.94, 60.20, 56.87, 27.53, 25.98, 21.91, 21.08, 13.28; HRMS (ESI)  $m/z$  Calcd. for  $\text{C}_{32}\text{H}_{33}\text{N}_4\text{O}_4^+$  ( $[\text{M}+\text{H}]^+$ ) 537.2496, Found 537.2499; Enantiomeric excess was determined to be 78% (determined by HPLC using chiral AD-H column, hexane/2-propanol = 70/30,  $\lambda = 254$  nm, 30 °C, 0.8 mL/min,  $t_{\text{major}} = 6.0$  min,  $t_{\text{minor}} = 10.2$  min).

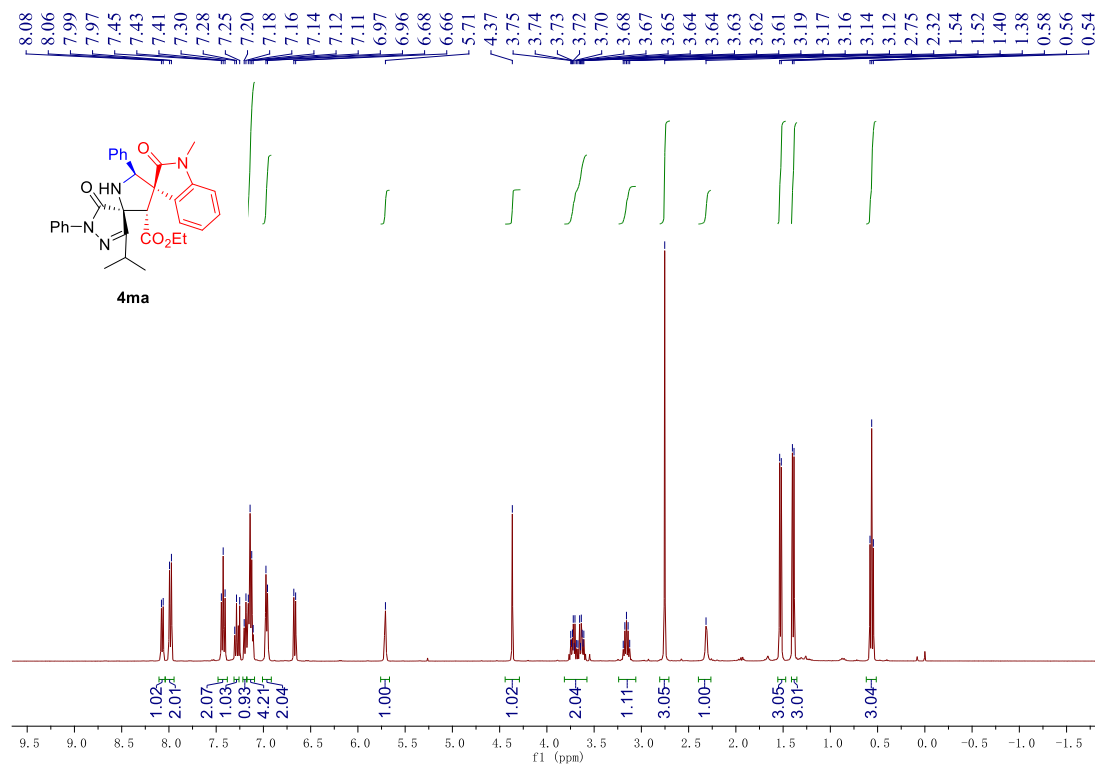

177.31  
 174.33  
 167.50  
 165.63  
 136.35  
 128.90  
 128.58  
 128.08  
 127.76  
 126.57  
 125.75  
 124.93  
 123.39  
 118.35  
 71.38  
 69.52  
 60.94  
 60.20  
 56.87  
 27.53  
 25.98  
 21.91  
 21.08  
 13.28

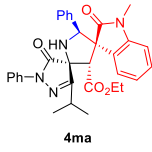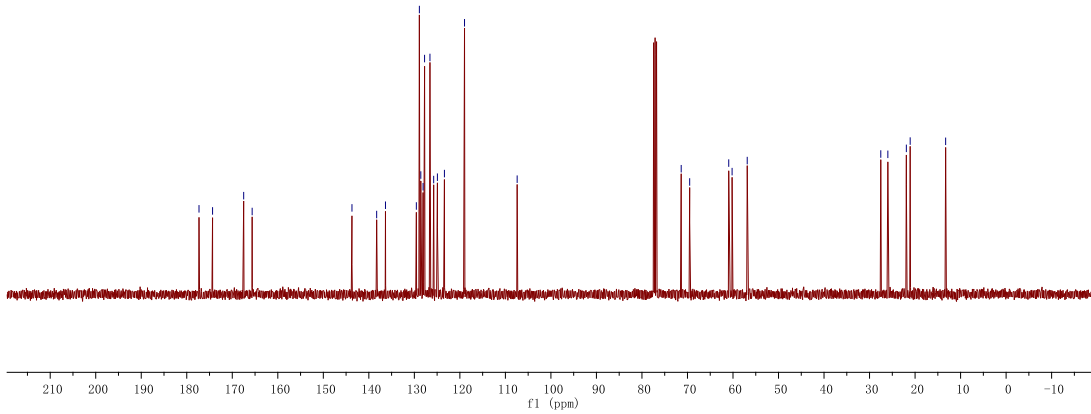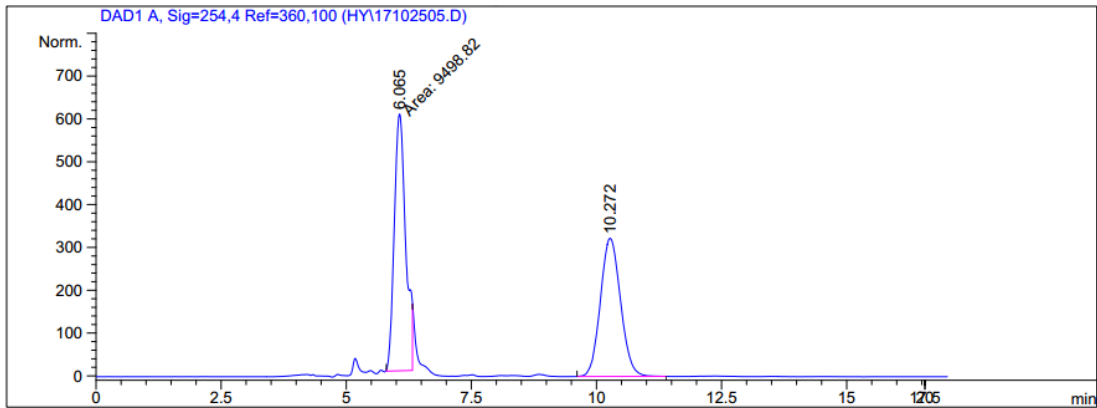

| Peak # | RetTime [min] | Type | Width [min] | Area [mAU*s] | Height [mAU] | Area %  |
|--------|---------------|------|-------------|--------------|--------------|---------|
| 1      | 6.065         | MM   | 0.2637      | 9498.81738   | 600.31177    | 51.2526 |
| 2      | 10.272        | BB   | 0.4386      | 9034.53027   | 322.76035    | 48.7474 |

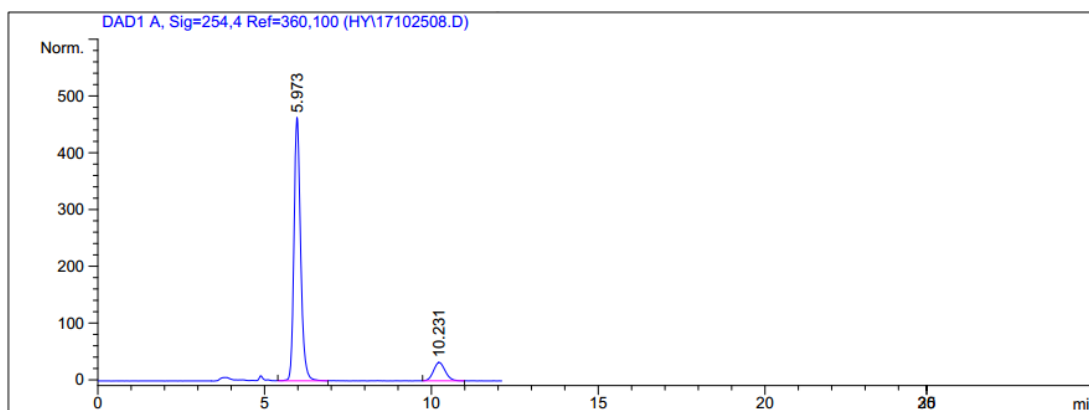

| Peak # | RetTime [min] | Type | Width [min] | Area [mAU*s] | Height [mAU] | Area %  |
|--------|---------------|------|-------------|--------------|--------------|---------|
| 1      | 5.973         | BB   | 0.2132      | 6408.82764   | 463.72354    | 89.0192 |
| 2      | 10.231        | BB   | 0.3835      | 790.54883    | 32.53530     | 10.9808 |

#### 4na

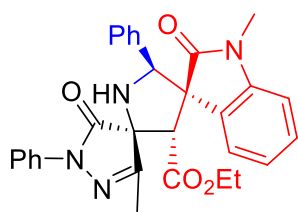

4na

Prepared according to the procedure within 72 h as White solid (82.3 mg, 81% yield, dr > 20:1). mp 112.3 – 113.6 °C;  $[\alpha]_D^{18} = -168.71$  (*c* 0.47, CH<sub>2</sub>Cl<sub>2</sub>); <sup>1</sup>H NMR (400 MHz, CDCl<sub>3</sub>) δ 8.09 (d, *J* = 7.4 Hz, 1H), 7.98 (d, *J* = 8.0 Hz, 2H), 7.46 – 7.40 (m, 2H), 7.32 (dd, *J* = 7.6 Hz, 1H), 7.23 (d, *J* = 7.3 Hz, 1H), 7.18 (dd, *J* = 13.6, 6.6 Hz, 4H), 7.02 (d, *J* = 6.8 Hz, 2H), 6.71 (d, *J* = 7.7 Hz, 1H), 5.75 (s, 1H), 4.29 (s, 1H), 3.80 – 3.59 (m, 2H), 2.79 (s, 3H), 2.44 (s, 1H), 2.41 (s, 3H), 0.58 (t, *J* = 7.1 Hz, 3H); <sup>13</sup>C NMR (101 MHz, CDCl<sub>3</sub>) δ 177.18, 174.37, 167.47, 159.11, 143.71, 138.10, 136.21, 129.58, 128.94, 128.61, 128.13, 127.76, 126.55, 125.66, 125.06, 123.40, 119.01, 107.43, 70.76, 69.77, 60.97, 60.28, 57.09, 26.01, 13.25, 12.75; HRMS (ESI) *m/z* Calcd. for C<sub>30</sub>H<sub>29</sub>N<sub>4</sub>O<sub>4</sub><sup>+</sup> ([M+H]<sup>+</sup>) 509.2183, Found 509.2178; Enantiomeric excess was determined to be 66% (determined by HPLC using chiral AD-H column, hexane/2-propanol = 70/30, λ = 254 nm, 30 °C, 0.8 mL/min, *t*<sub>major</sub> = 7.8 min, *t*<sub>minor</sub> = 10.7 min).



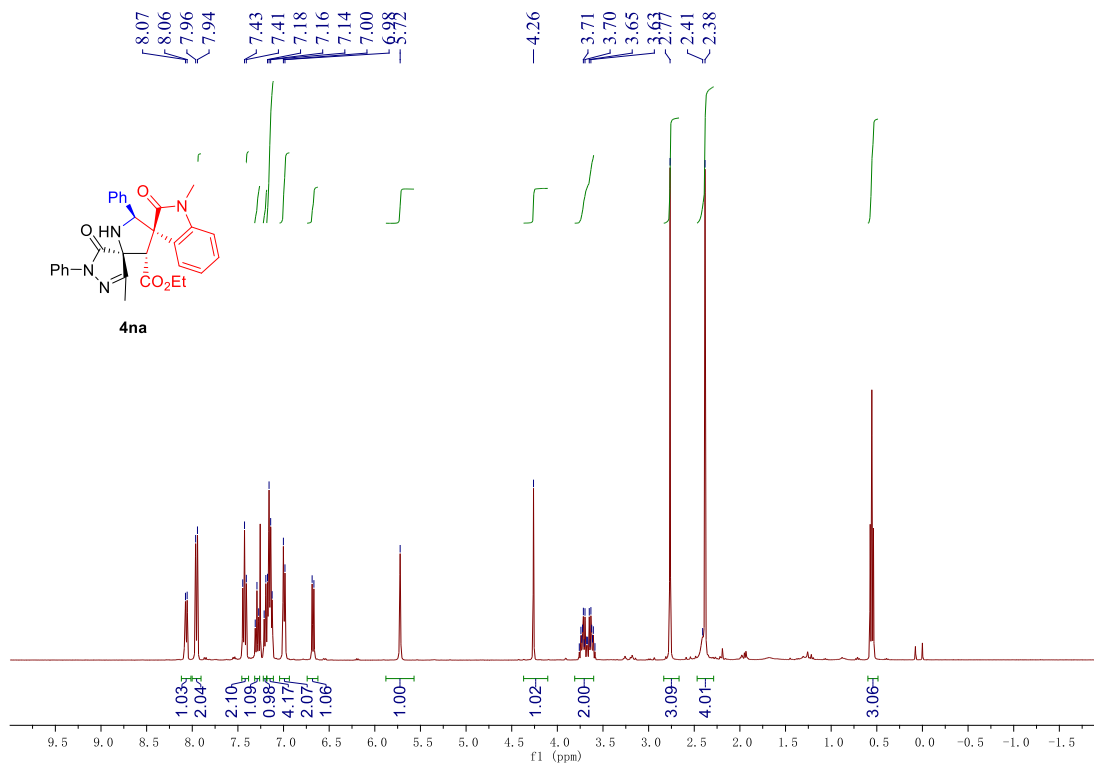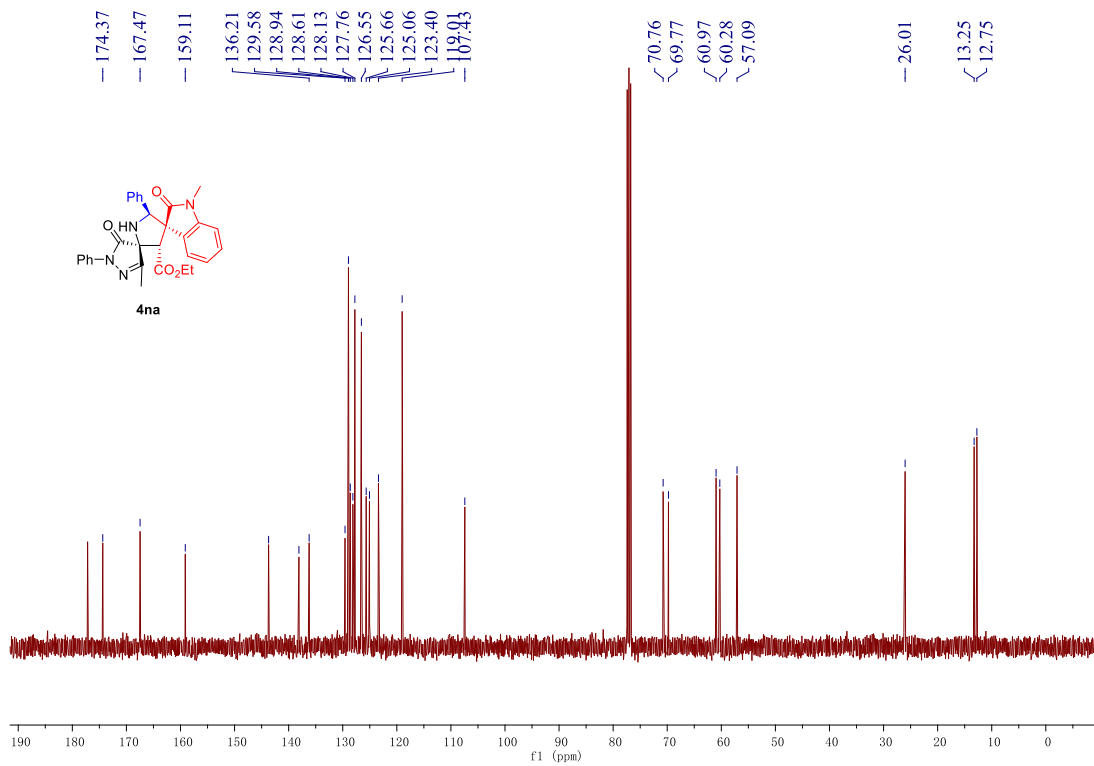

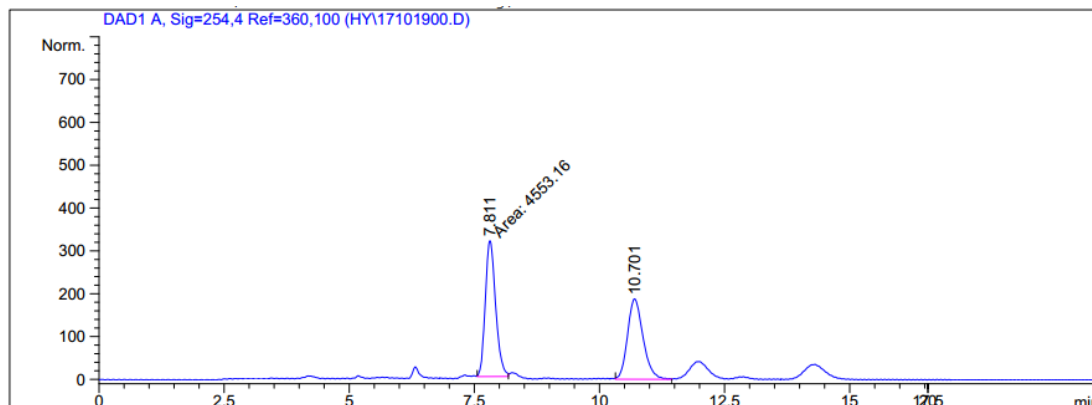

| Peak # | RetTime [min] | Type | Width [min] | Area [mAU*s] | Height [mAU] | Area %  |
|--------|---------------|------|-------------|--------------|--------------|---------|
| 1      | 7.811         | MM   | 0.2390      | 4553.16455   | 317.55609    | 52.8711 |
| 2      | 10.701        | BV   | 0.3240      | 4058.66113   | 187.88934    | 47.1289 |

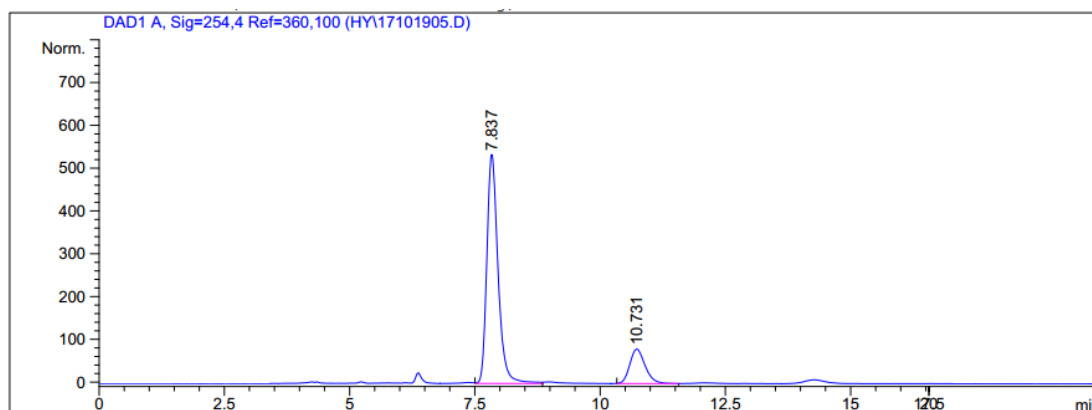

| Peak # | RetTime [min] | Type | Width [min] | Area [mAU*s] | Height [mAU] | Area %  |
|--------|---------------|------|-------------|--------------|--------------|---------|
| 1      | 7.837         | VB   | 0.2375      | 8316.05469   | 534.64166    | 82.9083 |
| 2      | 10.731        | BB   | 0.3284      | 1714.37305   | 80.53384     | 17.0917 |

5

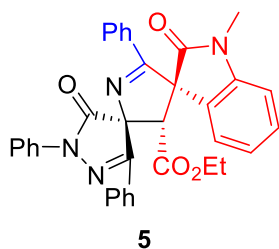

Prepared according to the procedure within 48 h as White solid (109.1 mg, 96% yield, dr > 20:1). mp 209.8 – 210.3 °C;  $[\alpha]_D^{14} = -70.82$  (*c* 0.83, CH<sub>2</sub>Cl<sub>2</sub>); <sup>1</sup>H NMR (400 MHz, CDCl<sub>3</sub>) δ 8.49 (d, *J* = 7.5 Hz, 1H), 8.19 – 8.01 (m, 4H), 7.56 – 7.42 (m, 7H), 7.40 – 7.32 (m, 2H), 7.28 – 7.19 (m, 3H), 7.14 (dd, *J* = 7.6 Hz, 1H), 6.93 (d, *J* = 7.7 Hz, 1H), 4.73 (s, 1H), 3.69 – 3.53 (m, 2H), 3.30 (s, 3H), 0.59 (t, *J* = 7.0 Hz, 3H); <sup>13</sup>C NMR (101 MHz,

CDCl<sub>3</sub>) δ 176.21, 174.85, 170.42, 166.37, 156.48, 144.10, 138.07, 132.10, 131.74, 130.90, 129.82, 129.59, 129.00, 128.98, 128.80, 127.94, 127.48, 127.19, 126.76, 125.56, 124.18, 119.59, 108.33, 84.09, 68.08, 61.32, 60.66, 27.05, 13.32; HRMS (ESI) *m/z* Calcd. for C<sub>35</sub>H<sub>29</sub>N<sub>4</sub>O<sub>4</sub><sup>+</sup> ([M+H]<sup>+</sup>) 569.2183, Found 569.2179; Enantiomeric excess was determined to be 95% (determined by HPLC using chiral AD-H column,

hexane/2-propanol = 70/30,  $\lambda = 254$  nm, 30 °C, 0.8 mL/min,  $t_{\text{major}} = 5.0$  min,  $t_{\text{minor}} = 6.1$  min).

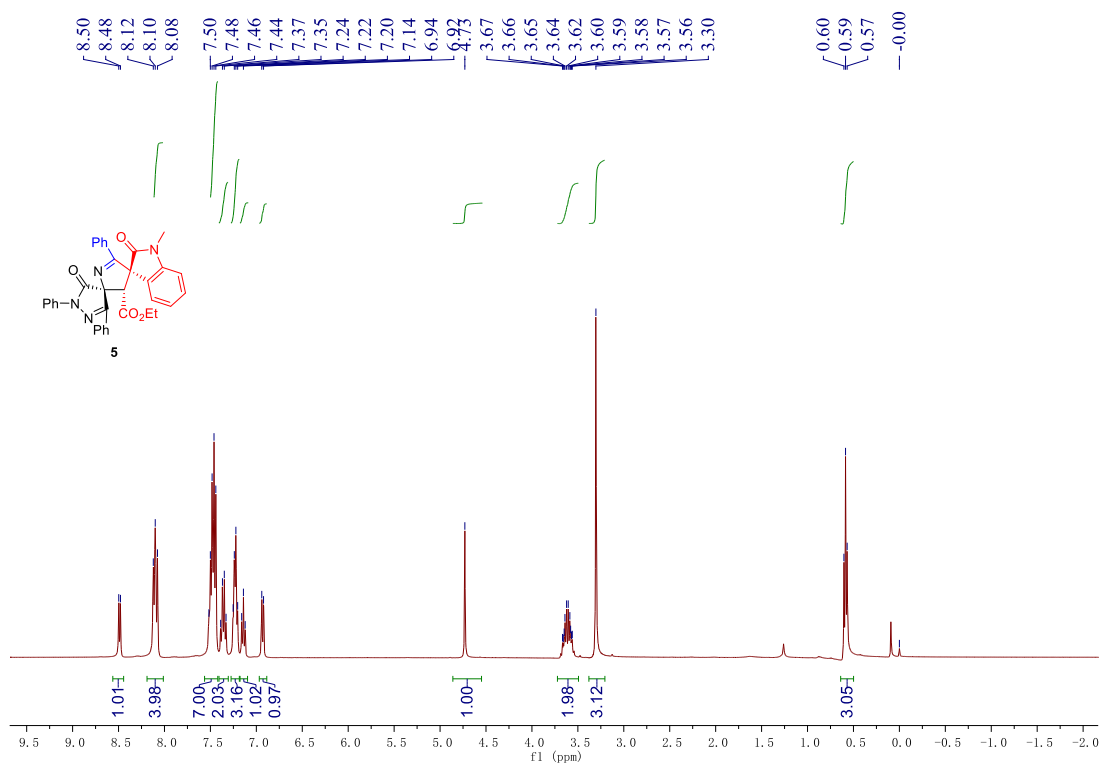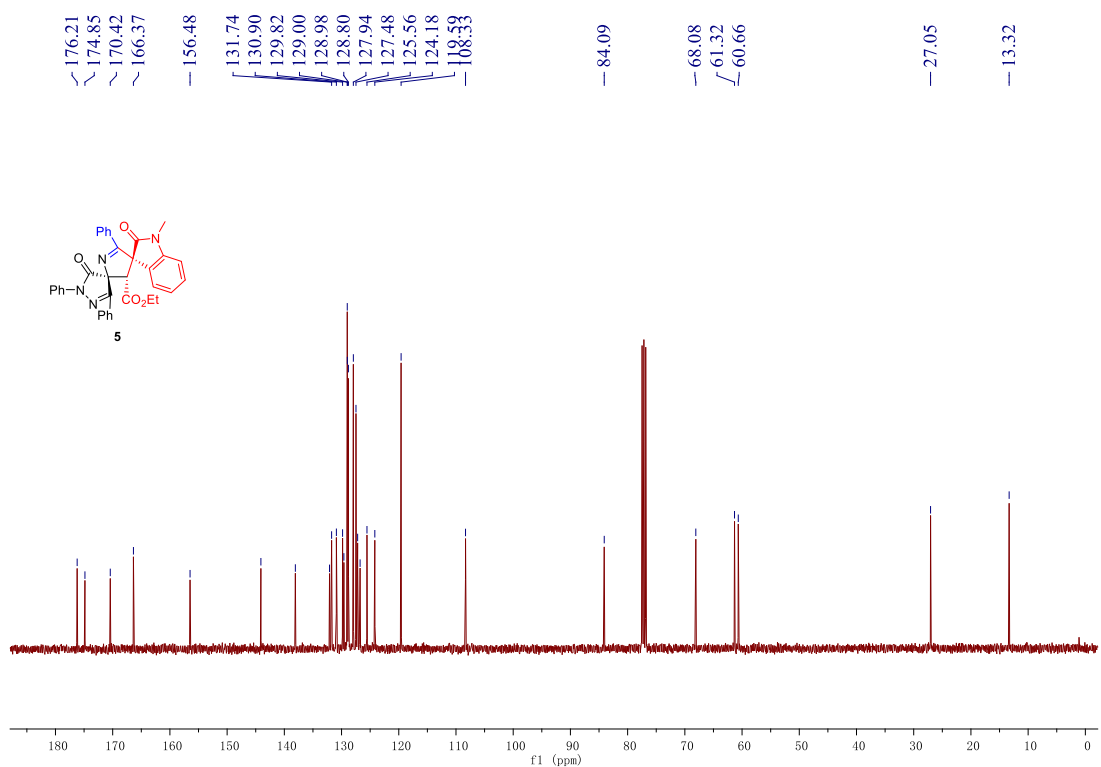

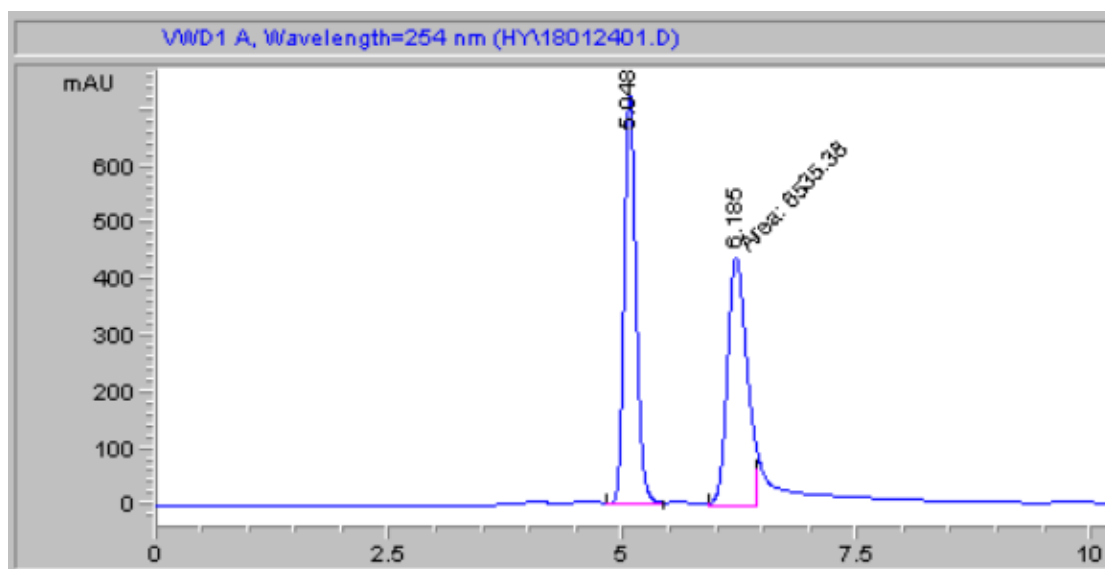

| # | Time  | Area   | Height | Width  | Area%  | Symmetry |
|---|-------|--------|--------|--------|--------|----------|
| 1 | 5.048 | 6494.5 | 735.4  | 0.1365 | 49.843 | 0.801    |
| 2 | 6.185 | 6535.4 | 440.8  | 0.2471 | 50.157 | 0.75     |

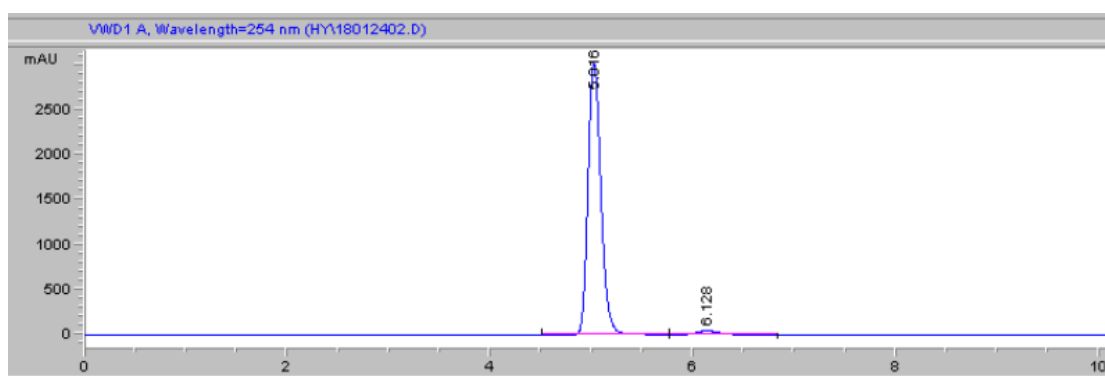

| # | Time  | Area    | Height | Width  | Area%  | Symmetry |
|---|-------|---------|--------|--------|--------|----------|
| 1 | 5.016 | 26732.8 | 3019.7 | 0.1382 | 97.457 | 0.781    |
| 2 | 6.128 | 697.7   | 44     | 0.2372 | 2.543  | 0.794    |

### 3. X-ray crystal structure of 4ad.

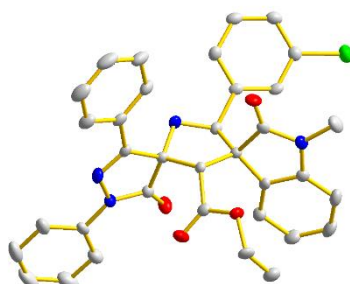

X-ray crystal structure of **4ad**.

Bond precision: C-C = 0.0049 Å                          Wavelength=0.71073  
  
 Cell:                          a=6.4132(4)                  b=10.9919(7)                  c=40.683(2)  
                                 alpha=90                  beta=90                  gamma=90  
 Temperature:                  173 K

|                        | Calculated       | Reported         |
|------------------------|------------------|------------------|
| Volume                 | 2867.9(3)        | 2867.9(3)        |
| Space group            | P 21 21 21       | P 21 21 21       |
| Hall group             | P 2ac 2ab        | P 2ac 2ab        |
| Moiety formula         | C35 H30 Cl N4 O4 | C35 H30 Cl N4 O4 |
| Sum formula            | C35 H30 Cl N4 O4 | C35 H30 Cl N4 O4 |
| Mr                     | 606.08           | 606.08           |
| Dx, g cm <sup>-3</sup> | 1.404            | 1.404            |
| Z                      | 4                | 4                |
| Mu (mm <sup>-1</sup> ) | 0.182            | 0.182            |
| F000                   | 1268.0           | 1268.0           |
| F000'                  | 1269.11          |                  |
| h,k,lmax               | 8,13,50          | 8,13,50          |
| Nref                   | 5831 [ 3372]     | 5813             |
| Tmin, Tmax             | 0.974, 0.982     | 0.638, 0.746     |
| Tmin'                  | 0.964            |                  |

Correction method= # Reported T Limits: Tmin=0.638 Tmax=0.746  
 AbsCorr = NONE

Data completeness= 1.72/1.00                  Theta(max) = 26.372

R(reflections)= 0.0435 ( 4754)                  wR2(reflections)= 0.0979 ( 5813)

S = 1.048                                          Npar= 403
